# Supplementary material for: Amino acid substitutions affecting aspartic acid 605 and valine 606 decrease the interaction strength between the influenza virus RNA polymerase PB2 '627' domain and the viral nucleoprotein
Source: PLoS One. 2018 Jan 16;13(1):e0191226. doi: 10.1371/journal.pone.0191226 (PMC5770049; doi:10.1371/journal.pone.0191226)
Supplement: S1 Appendix — (XLSX) [file pone.0191226.s001.xlsx]

## Sheet: Fig1A SPR PB2 627-NP 146-185
NP146 Pb2c Fc=2-1 - 2_X	2500 nm	0	313 nm	1250 nm	625 nm	1000 nm
112.5	-0.116699	0.0601807	-0.0964966	-0.088501	-0.0130615	-0.13031
113.5	-0.118652	-0.0687256	-0.0628662	-0.0404663	-0.0958862	-0.0772095
114.5	-0.0115967	-0.112122	-0.0230713	-0.0592041	-0.00561523	-0.0658569
115.5	-0.0233154	-0.0789185	-0.0750122	0.00366211	-0.0435181	0.0310059
116.5	0.00946045	-0.0335693	-0.0195313	-0.00762939	0.0482788	-0.0010376
117.5	0.0387573	0.120728	0.0800781	0.0145874	-0.0423584	-0.0272217
118.5	-0.0491333	-0.0421753	0.0472412	-0.0193481	-0.00720215	-0.0541382
119.5	0.024353	0.0339966	-0.0328369	0.00872803	0.0447388	0.0513306
120.5	-0.00769043	-0.0683594	0.0543213	0.055603	-0.0228271	-0.0088501
121.5	0.0172729	-0.055481	0.0390625	-0.0490723	-0.0404053	0.146606
122.5	0.0360718	-0.0617065	0.00354004	0.102478	-0.158752	0.0235596
123.5	0.365356	0.152344	0.0527344	0.176697	0.0521851	0.181396
124.5	-0.313965	0.513306	0.511719	0.147827	0.447876	0.454834
127.5	18.5856	0.201965	-1.23907	7.00446	0.0603638	109.84
128.5	23.7716	0.932068	1.4328	8.81305	2.34277	119.935
129.5	25.8255	0.828125	1.94025	9.70404	2.83575	123.515
130.5	27.1235	0.605469	2.19727	10.2463	3.09631	125.228
131.5	27.8403	0.444519	2.30157	10.6122	3.22949	126.527
132.5	28.1693	0.327759	2.5531	10.7658	3.41858	127.257
133.5	28.5856	0.257019	2.87579	10.9408	3.38458	127.701
134.5	28.8208	0.160583	3.05078	11.1255	3.53265	128.121
135.5	29.1306	0.235962	3.18201	11.3193	3.75177	128.438
136.5	29.3056	0.308228	3.28284	11.4916	3.79944	128.785
137.5	29.4525	0.232422	3.466	11.5771	3.98108	129.256
138.5	29.686	0.234009	3.50427	11.7529	4.03302	129.304
139.5	29.665	0.38324	3.63831	11.7541	4.08813	129.521
140.5	29.8454	0.272278	3.61292	11.7963	4.17871	129.597
141.5	29.8302	0.487488	3.69415	11.7845	4.21429	129.718
142.5	29.9091	0.368347	3.81604	11.9529	4.34631	129.827
143.5	30.0524	0.541443	4.0293	11.9299	4.43384	129.933
144.5	30.1149	0.509399	4.10742	11.9693	4.40723	129.992
145.5	30.1888	0.5	4.08124	12.0697	4.58575	130.04
146.5	30.1653	0.497253	4.22229	12.0951	4.67798	130.197
147.5	30.1923	0.578918	4.31836	12.2095	4.82288	130.305
148.5	30.2017	0.625427	4.47772	12.1982	4.75726	130.239
149.5	30.1884	0.641785	4.48322	12.1786	4.82794	130.251
150.5	30.079	0.680481	4.50427	12.1541	4.92719	130.031
151.5	30.0568	0.596863	4.56055	12.2353	4.92444	129.822
152.5	30.0349	0.673828	4.53241	12.1896	4.97095	129.709
153.5	30.1181	0.693787	4.61914	12.3146	5.0791	129.603
154.5	29.9509	0.775818	4.56836	12.1822	4.88617	129.486
155.5	29.89	0.83905	4.65198	12.2123	4.89044	129.343
156.5	29.8376	0.801941	4.61444	12.1548	5.15332	129.531
157.5	29.7618	0.933228	4.64685	12.1454	5.27051	129.418
158.5	29.6657	0.926208	4.716	12.174	5.21545	129.437
159.5	29.624	0.912903	4.71252	12.0744	5.09009	129.39
160.5	29.5696	1.00311	4.75079	12.1208	5.06079	129.354
161.5	29.6349	1.03674	4.82306	12.072	5.01544	129.349
162.5	29.4622	0.944946	4.74768	11.9501	4.96387	129.416
163.5	29.4446	1.05585	4.72034	11.8834	4.8631	129.302
164.5	29.3575	1.04218	4.68005	11.7927	4.86621	129.311
165.5	29.3493	1.04926	4.76599	11.851	4.86664	129.253
166.5	29.2896	1.09686	4.84845	11.9818	4.87366	129.064
167.5	29.3154	1.08167	4.85822	11.913	4.96075	129.046
168.5	29.3415	1.13715	4.88123	11.8638	4.94513	129.086
169.5	29.4103	1.13593	4.74725	11.9451	4.95178	129.04
170.5	29.3701	1.1875	4.74805	12.0212	4.91309	129.028
171.5	29.2443	1.18555	4.76331	11.9127	4.96234	129.077
172.5	29.2763	1.2215	4.7926	11.9701	5.0791	128.998
173.5	29.2466	1.24414	4.76288	11.9416	5.0014	128.903
174.5	29.2861	1.35785	4.80078	11.976	5.05219	128.911
175.5	29.2318	1.32501	4.79413	11.9146	5.0979	128.858
176.5	29.1364	1.33087	4.79456	11.9045	5.151	128.871
177.5	29.2271	1.3844	4.84412	11.8036	5.09747	128.757
178.5	29.2239	1.37073	4.83124	11.9408	5.11548	128.768
179.5	29.1259	1.41718	4.87775	11.976	4.99945	128.693
180.5	29.0626	1.34027	5.02344	11.8303	5.00177	128.797
181.5	29.1888	1.40625	4.92072	11.856	4.96429	128.828
182.5	29.131	1.41095	4.82733	11.9431	4.99438	128.722
183.5	29.2372	1.42108	4.82385	11.9646	5.04321	128.676
184.5	29.1755	1.36096	4.82849	11.933	4.95996	128.841
185.5	29.1458	1.46643	4.86993	11.8806	4.97247	128.979
186.5	29.1255	1.47736	4.83167	11.8591	4.96271	128.952
187.5	29.2126	1.6496	4.94568	11.9494	4.92053	128.766
188.5	29.1318	1.55273	4.9035	11.7662	4.87091	128.85
189.5	29.2247	1.66956	4.95081	11.8259	4.84009	128.827
190.5	29.2263	1.62189	5.02576	11.749	4.98303	128.855
191.5	29.2318	1.64569	5.00195	11.8228	5.03027	128.742
192.5	29.2197	1.71332	4.9035	11.9642	4.92603	128.635
193.5	29.2642	1.76019	4.98596	11.8381	5.02289	128.548
194.5	29.1302	1.70746	4.92499	11.7971	4.99396	128.578
195.5	29.2731	1.716	4.92224	11.7849	4.97717	128.505
196.5	29.2407	1.71173	4.91797	11.7724	4.90765	128.516
197.5	29.2571	1.67542	4.8949	11.7701	4.93579	128.542
198.5	29.1915	1.70941	4.95471	11.756	4.91235	128.549
199.5	29.1415	1.69843	4.7738	11.9568	4.92871	128.654
200.5	29.1911	1.67151	4.83984	11.965	5.01587	128.676
201.5	29.129	1.69452	4.92151	11.7037	4.89746	128.578
202.5	29.1415	1.65704	4.88635	11.6775	4.98029	128.661
203.5	29.2708	1.70746	4.76208	11.7092	4.95258	128.624
204.5	29.2231	1.68359	4.86249	11.6548	4.82056	128.592
205.5	29.2759	1.70001	4.86407	11.7463	4.93146	128.568
206.5	29.2454	1.72894	4.81799	11.8041	4.88965	128.65
207.5	29.2677	1.67462	4.90118	11.7307	4.91467	128.711
208.5	29.3486	1.83789	4.87537	11.7795	4.92017	128.769
209.5	29.249	1.83832	4.91211	11.8521	4.85767	128.747
210.5	29.32	1.91797	5.0531	11.8486	4.9389	128.809
211.5	29.3618	1.85315	5.03204	11.8173	4.83344	128.821
212.5	29.2263	1.88397	5.06445	11.9252	4.86505	128.772
214.5	31.3196	3.70508	4.25	13.9302	10.1967	115.674
215.5	18.2595	3.29297	7.53711	9.5896	4.42017	43.2931
216.5	14.2685	3.12384	5.91681	8.48492	5.31348	29.3541
217.5	12.4739	2.61407	5.11444	7.72943	4.57208	24.4236
218.5	11.6232	2.44299	4.74768	7.33728	4.29828	22.2009
219.5	11.0032	2.37152	4.5863	6.9986	4.22095	20.8681
220.5	10.5048	2.21448	4.48322	6.78571	4.01587	19.7486
221.5	10.0446	2.07776	4.42657	6.45093	3.91504	18.9114
222.5	9.93176	2.04535	4.25037	6.42908	3.77679	18.3591
223.5	9.56262	2.0285	4.28943	6.29779	3.81781	17.9595
224.5	9.16455	2.05939	4.1543	6.17987	3.78149	17.4532
225.5	9.03021	1.98907	4.1012	6.08258	3.65259	17.1111
226.5	8.89893	1.95233	4.06915	5.96735	3.72095	16.8595
227.5	8.70245	1.97894	4.04883	5.94312	3.60919	16.4884
228.5	8.51141	1.9762	3.94568	5.7771	3.45532	16.2861
229.5	8.46338	1.90472	3.86053	5.66772	3.63965	15.9669
230.5	8.16302	1.87152	3.85583	5.5849	3.47754	15.781
231.5	8.1579	2.12854	3.80585	5.45483	3.47485	15.6181
232.5	8.04895	1.85315	3.79022	5.52045	3.39868	15.3622
233.5	7.95209	1.80078	3.70782	5.33728	3.3252	15.1771
234.5	7.86963	1.88635	3.6828	5.20526	3.24438	15.0814
235.5	7.82318	1.98322	3.66876	5.10681	3.1803	14.8544
236.5	7.71576	1.96014	3.72577	5.08881	3.23615	14.6779
237.5	7.68524	2.02112	3.69299	5.1994	3.33185	14.5599
238.5	7.729	2.03204	3.65198	5.23529	3.15607	14.4791
239.5	7.65442	1.80823	3.68909	4.99506	3.19556	14.365
240.5	7.49817	1.8703	3.55743	4.92322	3.13538	14.2318
241.5	7.27277	1.82617	3.46057	4.93256	3.19708	14.0814
242.5	7.40131	1.78516	3.46759	4.9599	3.07288	13.9337
243.5	7.15869	1.80585	3.49689	4.79236	3.07794	13.8599
244.5	7.14661	1.68829	3.39258	4.87396	3.03345	13.8279
245.5	7.05048	1.65277	3.59296	4.75757	2.98224	13.715
246.5	7.00128	1.70001	3.3703	4.65253	2.95844	13.4974
247.5	6.90167	1.67773	3.29413	4.51227	3.06079	13.3755
248.5	6.83173	1.64063	3.26367	4.57867	3.04553	13.365
249.5	6.74426	1.67657	3.26642	4.41815	2.97717	13.2919
250.5	6.75677	1.58441	3.21796	4.56854	2.95062	13.2177
251.5	6.78723	1.64691	3.11444	4.42084	2.97211	13.14
252.5	6.72198	1.59222	3.17853	4.47321	3.00684	13.0517
253.5	6.67981	1.61292	3.22815	4.49664	2.92871	12.9931
254.5	6.68994	1.62695	3.15741	4.4267	2.90179	13.1119
255.5	6.6427	1.71014	3.00195	4.31732	2.87524	12.865
256.5	6.55438	1.66522	3.09216	4.27594	2.83929	12.7076
257.5	6.58563	1.69104	3.2301	4.25055	2.78381	12.7841
258.5	6.51923	1.62695	3.12811	4.28491	2.75256	12.6861
259.5	6.52435	1.66254	3.17072	4.28143	2.81427	12.747
260.5	6.46533	1.56366	3.09802	4.3158	2.73303	12.5947
261.5	6.44305	1.60156	3.1004	4.35211	2.86194	12.5771
262.5	6.46924	1.71759	3.14532	4.34198	2.81818	12.572
263.5	6.62079	1.69495	3.05701	4.4306	2.87952	12.4603
264.5	6.60443	1.62933	3.091	4.27869	2.78772	12.4509
265.5	6.35443	1.62811	3.16095	4.31464	2.79474	12.297
266.5	6.15204	1.58203	3.06561	4.42749	2.8385	12.4041
267.5	6.30988	1.68793	3.14417	4.29858	2.83032	12.2974
268.5	6.27161	1.72461	3.10547	4.34821	2.9104	12.2122
269.5	6.18604	1.64301	3.11328	4.26031	2.88696	12.1622
270.5	6.16888	1.56879	2.97424	4.23529	2.80298	12.1407
271.5	5.97357	1.57581	3.02618	4.29156	2.73419	11.9943
272.5	6.08759	1.76288	3.02576	4.38177	2.6709	11.9626
273.5	5.98138	1.69104	3.05078	4.14349	2.71973	12.0677
274.5	6.013	1.62579	3.26447	4.09784	2.83423	12.0447
275.5	5.94305	1.62225	3.09845	3.90912	2.81274	12.0595
276.5	6.0036	1.56525	3.03357	4.09155	2.77521	12.0224
277.5	5.94696	1.57269	3.04724	4.1701	2.72443	11.9654
278.5	5.95282	1.62073	2.98865	4.08221	2.69867	11.9228
279.5	5.98645	1.60547	3.01721	4.09979	2.72168	11.9208
280.5	5.83685	1.61914	3.01599	4.16815	2.65411	12.0701
281.5	5.79071	1.50116	3.01642	4.09003	2.69751	11.8767
282.5	5.81378	1.64337	2.97034	4.26227	2.60645	11.8251
283.5	5.88135	1.60004	2.96759	4.10913	2.7522	11.8142
284.5	5.67395	1.61682	2.97852	4.01776	2.59357	11.7025
285.5	5.73407	1.57697	2.94806	4.06616	2.6424	11.6927
286.5	5.78955	1.57697	3.06561	3.91577	2.66272	11.6357
287.5	5.72394	1.59613	2.92969	3.98376	2.72168	11.5443
288.5	5.76416	1.45782	2.93866	3.8974	2.75647	11.6814
289.5	5.77667	1.45392	2.92151	3.92358	2.65021	11.631
290.5	5.6958	1.55157	2.97577	3.84589	2.57446	11.5224
291.5	5.87469	1.47034	2.97424	3.85797	2.53772	11.4939
292.5	5.72278	1.46173	3.02069	3.85291	2.57092	11.3611
293.5	5.62628	1.52148	2.88165	3.93884	2.65063	11.3619
294.5	5.59778	1.56683	2.91602	3.84741	2.69904	11.3423
295.5	5.56067	1.49921	2.88281	3.87982	2.49512	11.3873
296.5	5.46497	1.40082	2.90039	3.83685	2.54474	11.324
297.5	5.63446	1.45081	2.94141	3.93182	2.53577	11.2712
298.5	5.54816	1.50354	2.91132	3.86969	2.45215	11.3036
299.5	5.50793	1.56055	2.89337	3.8736	2.39673	11.2032
300.5	5.50012	1.56915	2.90704	4.05096	2.58069	11.1591
301.5	5.5376	1.48828	2.82928	3.82709	2.59906	11.2083
302.5	5.52942	1.45081	2.91913	3.98492	2.57092	11.2447
303.5	5.37628	1.46094	2.86877	3.98767	2.59943	11.2025
304.5	5.4259	1.46094	2.78436	3.83453	2.6225	11.1321
305.5	5.47119	1.48596	2.98163	3.89508	2.58575	11.1572
306.5	5.35986	1.44379	2.76953	3.79431	2.53381	11.1161
307.5	5.45166	1.50116	2.85156	3.80756	2.55725	11.1478
308.5	5.51025	1.58752	2.97107	3.96265	2.65802	11.0665
309.5	5.39465	1.38129	2.79846	3.80487	2.45648	10.8115
310.5	5.38409	1.37891	2.80896	3.74469	2.48108	11.0587
311.5	5.20013	1.37811	2.83435	3.69781	2.33575	10.9247
312.5	5.25873	1.28479	2.77148	3.66541	2.35449	10.8767
313.5	5.03998	1.37738	2.69611	3.59039	2.32324	10.783
314.5	5.19543	1.25159	2.62146	3.59937	2.31	10.7161
315.5	5.23529	1.36487	2.79572	3.61853	2.35883	10.7642
316.5	5.1806	1.29144	2.76642	3.64233	2.39282	10.7599
317.5	5.10559	1.32617	2.77734	3.63177	2.37286	10.6681
318.5	5.14581	1.32343	2.78632	3.66931	2.28809	10.6556
319.5	5.25012	1.34924	2.76013	3.72162	2.44867	10.6755
320.5	5.19855	1.4176	2.82928	3.73022	2.36078	10.7122
321.5	5.1626	1.37073	2.80042	3.74353	2.38501	10.7216

## Sheet: Fig1B NMR CSP
		NP	CSP	Residue	Peptide CSP	NP CSP
T569	0.0348875	G541	0.00615769	G532	0.0112055	0
Y572	0.0528101	E543	0.00512391	H534	0.00338199	0
K674	0.259881	S544	0.00401182	M535	0.00397998	0
E576	0.133278	V545	0.00955984	A536	0.00265691	0
F577	0.0569556	L546	0.00461795	S537	0.00104627	0
E578	1.01406	V547	0	E538	0.000769231	0
L583	0.0352105	N548	0.00544418	I539	0.0018349	0
R589	0.268782	T549	0.000769231	N540	0.00419918	0
Q601	0.214286	Y550	0.00576667	G541	0.0018349	0.00615769
Q602	0.0144462	Q551	0.0070606	E543	0.00214283	0.00512391
M603	0.0626449	W552	0.00571565	S544	0.000153846	0.00401182
R604	0.0956559	I553	0	V545	0.00202353	0.00955984
D605	0.155444	I554	0.00781025	L546	0.00265691	0.00461795
V606	0.129806	R555	0.0129736	V547	0.00415385	0
L607	1.58658	N556	0.00404706	N548	0.00317162	0.00544418
T609	1.04303	W557	0.00251504	T549	0.0018349	0.000769231
F610	0.174435	E558	0.00500237	Y550	0.003	0.00576667
D611	1.86311	T559	0.00428566	Q551	0.00317162	0.0070606
T612	0.207744	V560	0.00955984	W552	0.00440548	0.00571565
V613	0.50267	L561	0	I554	0.0034444	0.00781025
Q614	0.0568536	I562	0.00728011	R555	0.00309705	0.0129736
I615	0.0356336	Q563	0.00828487	N556	0.001	0.00404706
I616	0.0220508	W564	0.008	W557	0.000307692	0.00251504
K617	0.0154551	S565	0.00243252	E558	0.00104627	0.00500237
L618	0.0759783	Q566	0	T559	0.00292308	0.00428566
F621	0.00418507	E567	0.00915772	V560	0.00338199	0.00955984
Q628	0.00455961	T569	0.0101177	I562	0.00117418	0.00728011
R630	0.011248	M570	0.00700169	Q563	0.00252326	0.00828487
M631	0.0237426	L571	0.0061788	W564	0.0034444	0.008
Q632	0.0145978	Y572	0.0145838	S565	0.000461538	0.00243252
F633	0.0416871	N573	0.0112686	Q566	0.00733961	0
L648	2.37604	K574	0.00511466	T569	0.00136091	0.0101177
N657	0.121854	M575	0.00817704	M570	0.0030353	0.00700169
D671	0.414064	E576	0.0110526	L571	0.00196568	0.0061788
L675	0.0290191	F577	0.0130007	Y572	0.00209253	0.0145838
		E578	0.004	N573	0.00384615	0.0112686
		F580	0.00608276	K574	0.00101177	0.00511466
		Q581	0.00294426	M575	0.00153846	0.00817704
		S582	0.00609588	E576	0.00595297	0.0110526
		L583	0.0101856	F577	0.00766457	0.0130007
		V584	0.00564272	E578	0.00341594	0.004
		A588	0.00841561	F580	0.00752786	0.00608276
		R589	0.0127498	Q581	0.00237467	0.00294426
		S590	0.0034444	S582	0.000307692	0.00609588
		Q591	0.000307692	L583	0.000461538	0.0101856
		Y592	0.00716707	V584	0.000307692	0.00564272
		S593	0.00205256	K586	0.000923077	0
		G594	0.0070606	A588	0.00117418	0.00841561
		F595	0.00382533	R589	0.00107692	0.0127498
		V596	0	S590	0.00117418	0.0034444
		R597	0.00742019	Q591	0.00117418	0.000307692
		T598	0.00565685	Y592	0	0.00716707
		L599	0.00418507	S593	0.000307692	0.00205256
		F600	0.00680454	G594	0.00101177	0.0070606
		Q601	0.00809412	F595	0.00170797	0.00382533
		Q602	0.0119894	V596	0.00104627	0
		M603	0.0148921	R597	0.00117418	0.00742019
		R604	0.0190622	T598	0.00138462	0.00565685
		D605	0.0105796	L599	0.00227151	0.00418507
		V606	0	F600	0.00104627	0.00680454
		L607	0.0191907	Q601	0.00272182	0.00809412
		G608	0.0107141	Q602	0.00402654	0.0119894
		T609	0.00564272	M603	0.0136291	0.0148921
		F610	0.0120131	R604	0.00814659	0.0190622
		D611	0.0130907	D605	0.00695718	0.0105796
		T612	0	V606	0.0144222	0
		V613	0	L607	0.0252506	0.0191907
		Q614	0.00500946	G608	0.0177531	0.0107141
		I615	0.0100012	T609	0.00579175	0.00564272
		I616	0	F610	0.00839555	0.0120131
		K617	0.00577948	D611	0.00723609	0.0130907
		L618	0.00600197	T612	0.0018349	0
		L619	0	V613	0.00300394	0
		F621	0.0144495	Q614	0.0101177	0.00500946
		A622	0.00209253	I615	0.00237467	0.0100012
		A623	0.0061941	I616	0.00196568	0
		A624	0.00600788	K617	0.00243252	0.00577948
		E627	0.00612493	L618	0.00440548	0.00600197
		Q628	0.00827057	F621	0.00227151	0.0144495
		S629	0.00272182	A623	0.000307692	0.0061941
		L636	0.00766457	A624	0.00205256	0.00600788
		T637	0	E627	0.00246154	0.00612493
		V638	0.00601773	Q628	0.00196568	0.00827057
		N639	0.0080369	S629	0.000615385	0.00272182
		V640	0	R630	0.00214283	0
		R641	0.00929115	M631	0.00382533	0
		G642	0	Q632	0.000769231	0
		S643	0.00500237	S635	0.000153846	0
		G644	0.00802363	L636	0.00117418	0.00766457
		M645	0.00251504	T637	0.00136091	0
		R646	0.00609588	V638	0.00136091	0.00601773
		I647	0.0018349	N639	0.000307692	0.0080369
		L648	0.0190305	R641	0.00252326	0.00929115
		V649	0.00642849	G642	0.000307692	0
		R650	0.00538516	S643	0	0.00500237
		G651	0	G644	0.00196568	0.00802363
		S653	0.00604911	M645	0.00196568	0.00251504
		A655	0.00502126	R646	0.0018349	0.00609588
		F656	0.00532994	I647	0.00117418	0.0018349
		N657	0.0101144	L648	0.00612493	0.0190305
		Y658	0.00728011	V649	0.00117418	0.00642849
		N659	0.00306247	R650	0.00276923	0.00538516
		K660	0.00220274	G651	0.00632456	0
		T661	0.00414243	N652	0.00123077	0
		T662	0	S653	0.00301574	0.00604911
		K663	0	A655	0.000461538	0.00502126
		R664	0.00603148	F656	0.00136091	0.00532994
		L665	0.0092359	N657	0.00104627	0.0101144
		T666	0.00402654	Y658	0.00512391	0.00728011
		I667	0.00202353	N659	0.00104627	0.00306247
		L668	0.00814659	K660	0.000461538	0.00220274
		G669	0.0100578	T661	0.00646337	0.00414243
		K670	0.00301574	T662	0.00454302	0
		D671	0.0162772	R664	0.00169231	0.00603148
		A672	0.0190156	L665	0.00117418	0.0092359
		G673	0.005	T666	0.000307692	0.00402654
		A674	0	I667	0.0034444	0.00202353
		L675	0.0107703	L668	0.00138462	0.00814659
		T676	0.00369231	G669	0.0126154	0.0100578
		E677	0	K670	0.00117418	0.00301574
		D678	0.00571565	D671	0	0.0162772
		D680	0.00318744	A672	0.000769231	0.0190156
		E681	0.008544	G673	0	0.005
		G682	0.00419918	A674	0.00123077	0
		T683	0.00293923	L675	0.00369311	0.0107703
		A684	0.00670776	T676	0.00701689	0.00369231
		G685	0.00220274	E677	0.0093204	0
		V686	0	D678	0.0036698	0.00571565
		E687	0.00393136	D680	0.0053255	0.00318744
		S688	0.00463904	E681	0.0125658	0.008544
		A689	0.00440884	G682	0.00406457	0.00419918
		V690	0	T683	0.00610752	0.00293923
		L691	0.00692308	A684	0.00406457	0.00670776
		R692	0.00926819	G685	0.00397998	0.00220274
		G693	0	V686	0.00200591	0
				E687	0.00461025	0.00393136
				S688	0.00440884	0.00463904
				A689	0.0035418	0.00440884
				V690	0.00517447	0
				L691	0.00616393	0.00692308

## Sheet: Fig2 Luciferase reporter assay
	Luciferase signal			GFP			Luciferase signal			GFP			Average	SD	Average	SD	p-value	Relative RNP activity to WT
WT	776	846	900	11498	12389	11292	16159	17480	25696	58457	54209	41043	0.0718263	0.00683258	0.299441	0.0325483	1	1
Q601A							2988	4663	208	87385	48646	30764			0.0972554	0.089183	0.0185944	0.32479
Q602A	32	30	20	11999	11652	10075							0.00240889	0.000369887			0.00314048	0.0335377
M603A	68	44	42	9612	11554	11973							0.00479686	0.00197819			0.00185819	0.0667842
R604A	62	60	62	8705	12631	9424							0.0061505	0.00124275			0.0027976	0.0856303
D605A	172	154	150	9938	11062	10731							0.015069	0.00193863			0.00278885	0.209798
V606A	14	18	10	5233	5869	4879							0.0025973	0.00051315			0.00309126	0.0361608
L607A							3272	3142	4691	31038	27216	31672			0.122993	0.0223242	0.0348166	0.410741
negative	26	16	16	8103	8085	7594							0.00243153	0.000676073			0.00297819	0.0338529

## Sheet: Fig3 RNP reconstitution
NA 47
Variants	Average
	mRNA	vRNA		mRNA				vRNA
WT	1	1		1	1	1		1	1	1
Q601A	0.921674	1.25952		1.03028	0.860457	0.874285		1.41286	0.591026	1.77466
Q602A	-0.0269997	0.279059		-0.0320748	-0.0989285	0.0500043		0.236686	0.26598	0.334511
M603A	0.411634	1.289		0.417432	0.273169	0.5443		1.23929	1.06143	1.56629
R604A	0.409109	1.05506		0.330735	0.23774	0.658853		0.42427	1.13034	1.61057
D605A	1.3043	1.10106		1.43024	1.06153	1.42113		0.651797	1.33998	1.3114
V606A	1.21679	1.15468		1.20554	1.48635	0.958485		0.784452	1.62634	1.05323
L607A	1.6474	1.17328		2.0188	1.51459	1.40882		1.43485	0.966261	1.11874
negative	-0.054582	0.273288		-0.0337147	-0.147224	0.0171922		0.160111	0.276358	0.383396
	Standard Error
	mRNA	vRNA
WT	0	0
Q601A	0.0544502	0.350182
Q602A	0.043068	0.0289869
M603A	0.0783224	0.147844
R604A	0.127725	0.344517
D605A	0.121413	0.224783
V606A	0.152486	0.248269
L607A	0.188191	0.137991
negative	0.0485961	0.064475
NA full-length
Variants	Average
	mRNA	vRNA		mRNA				vRNA
WT	1	1		1	1	1		1	1	1
Q601A	1.07173	1.30317		1.14408	0.999173	1.07173		0.918797	0.79249	1.30317
Q602A	0.0323644	0.174365		-0.0107468	-0.000505492	0.0323644		0.095181	0.461916	0.174365
M603A	0.0532552	0.245065		0.0208204	0.0810215	0.0532552		0.656233	0.0980026	0.245065
R604A	0.0411412	0.081737		0.0731222	0.0963919	0.0411412		0.368847	0.237733	0.081737
D605A	0.11858	0.18247		0.237733	0.0731222	0.11858		0.181684	0.095181	0.18247
V606A	0.475596	1.04473		0.396296	0.328737	0.475596		1.06123	0.552549	1.04473
L607A	1.24077	1.50845		1.61928	1.52408	1.24077		1.36745	1.20002	1.50845
negative	0.0128253	0.0638556		-0.0389906	0.0495421	0.0128253		-0.149159	0.146884	0.0638556
Standard Error
	mRNA	vRNA
WT	0	0
Q601A	0.0418322	0.153568
Q602A	0.013004	0.111418
M603A	0.017396	0.167051
R604A	0.0160155	0.0829852
D605A	0.0490809	0.0289662
V606A	0.0424398	0.166879
L607A	0.113674	0.0891454
negative	0.0256808	0.0881637

## Sheet: Fig4A SPR WT PB2 627-NPR416A
Time (s)	7.81nM	15.63nM	31.25nM	62.5nM	125nM	250nM	500nM	1000nM	2000nM	4000nM	8000nM
1.5	6.95996	5.08887	5.55859	6.1875	6.78223	6.47559	7.03223	6.99805	7.3418	7.57227	-1.98828
2.5	-2.38281	-3.96875	-3.32422	-3.02637	-2.25	-2.53027	-2.17773	-2.24805	-2.14063	-2.25195	-1.96094
3.5	-2.43652	-3.89551	-3.35645	-2.7959	-2.20215	-2.54297	-2.09375	-2.27344	-2.24219	-2.23047	-1.85547
4.5	-2.64063	-4.44238	-3.8623	-3.375	-2.59961	-2.86816	-2.73438	-2.62305	-2.79297	-2.7168	-2.67773
5.5	-2.12207	-3.23438	-3.15723	-2.49219	-1.98145	-2.41113	-1.74512	-2.05859	-1.9668	-2.17969	-1.40039
6.5	-1.56055	-2.75879	-2.55566	-2.07617	-1.61719	-1.74316	-1.32324	-1.56836	-1.64063	-1.61523	-1.25391
7.5	-1.38574	-2.80957	-2.49121	-2.06543	-1.59961	-1.74219	-1.23242	-1.54492	-1.60156	-1.59961	-1.28906
8.5	-1.31836	-2.66602	-2.31348	-1.95703	-1.53613	-1.66113	-1.18262	-1.35156	-1.44141	-1.49023	-1.11133
9.5	-1.2207	-2.50879	-2.23926	-1.88184	-1.49023	-1.62305	-1.22754	-1.42773	-1.4082	-1.3457	-0.919922
10.5	-1.31836	-2.60352	-2.27832	-1.70117	-1.55664	-1.6709	-1.35254	-1.32031	-1.5625	-1.39258	-1.19336
11.5	-1.41016	-2.55859	-2.41504	-1.97461	-1.70313	-1.7041	-1.32422	-1.50977	-1.53906	-1.4707	-1.20703
12.5	-1.23535	-2.38379	-2.21289	-1.74609	-1.58984	-1.6416	-1.23828	-1.46484	-1.53516	-1.46484	-1.28711
13.5	-1.44238	-2.55566	-2.21777	-1.85156	-1.46582	-1.5293	-1.30762	-1.5	-1.53516	-1.4375	-1.23047
14.5	-1.53809	-2.51367	-2.27734	-1.94434	-1.44727	-1.67773	-1.46387	-1.52734	-1.57813	-1.56641	-1.32422
15.5	-1.38574	-2.29102	-2.3125	-1.80762	-1.38574	-1.68848	-1.26855	-1.34766	-1.49414	-1.50391	-1.16602
16.5	-1.47266	-2.28906	-2.30273	-1.77832	-1.44824	-1.41406	-1.2666	-1.24414	-1.41016	-1.35352	-1.15625
17.5	-1.40527	-2.31348	-2.33398	-1.80957	-1.52148	-1.70117	-1.36133	-1.57617	-1.57227	-1.74023	-1.38281
18.5	-1.16504	-2.13574	-2.0625	-1.73145	-1.44238	-1.61133	-1.25	-1.22266	-1.31836	-1.49023	-1.36328
19.5	-1.27637	-2.56152	-2.10742	-1.78125	-1.35645	-1.46582	-1.30078	-1.48047	-1.6543	-1.58594	-1.54297
20.5	-1.34277	-2.17383	-2.07715	-1.67871	-1.33984	-1.50781	-1.2832	-1.5	-1.51563	-1.52344	-1.33008
21.5	-1.24707	-2.18555	-1.99805	-1.7627	-1.34863	-1.44922	-1.1084	-1.39648	-1.45117	-1.38672	-1.31836
22.5	-1.33691	-2.05859	-2	-1.61328	-1.32031	-1.33887	-1.08594	-1.29883	-1.41016	-1.32617	-1.27148
23.5	-1.21875	-1.94531	-1.80469	-1.63574	-1.32813	-1.29883	-1.12207	-1.41406	-1.45703	-1.35352	-1.28516
24.5	-1.00977	-1.86719	-1.68262	-1.49609	-1.23828	-1.31934	-0.974609	-1.1582	-1.44141	-1.20508	-1.23242
25.5	-0.995117	-1.83691	-1.56836	-1.26563	-1.22656	-1.32129	-0.927734	-1.0918	-1.22852	-1.21094	-1.14844
26.5	-1.04785	-1.68555	-1.72754	-1.30176	-1.19434	-1.21875	-0.839844	-1.34961	-1.35156	-1.17188	-1.09766
27.5	-1.15918	-1.66602	-1.76758	-1.41504	-1.10254	-1.19727	-0.93457	-1.19922	-1.32617	-1.27148	-1.06055
28.5	-1.17676	-1.81836	-1.78809	-1.33691	-1.10449	-1.12109	-1.06348	-1.38867	-1.36523	-1.25781	-1.25
29.5	-1.08887	-1.73633	-1.71484	-1.30957	-1.21582	-1.23145	-1.2334	-1.33984	-1.2832	-1.51367	-1.38477
30.5	-1.26172	-1.7334	-1.58887	-1.32813	-1.3418	-1.20605	-1.26563	-1.26172	-1.41211	-1.34375	-1.31445
31.5	-1.0459	-1.60254	-1.38965	-1.15332	-1.19727	-1.2002	-1.03223	-1.12695	-1.2207	-1.33008	-1.28711
32.5	-1.08301	-1.80762	-1.62109	-1.2168	-0.962891	-1.24512	-1.22754	-1.10938	-1.43555	-1.5	-1.31641
33.5	-1.18555	-1.63184	-1.58691	-1.32813	-1.07129	-1.19727	-1.26367	-1.28516	-1.26367	-1.49805	-1.4082
34.5	-0.979492	-1.40039	-1.44629	-1.21777	-0.90918	-1.2793	-1.31445	-1.11133	-1.27148	-1.375	-1.15234
35.5	-0.936523	-1.51953	-1.53613	-1.18066	-1.02148	-1.16504	-1.23535	-1.13867	-1.29102	-1.4043	-1.35547
36.5	-1.10547	-1.52734	-1.41113	-1.33301	-0.988281	-1.3457	-1.27637	-1.24023	-1.36133	-1.49023	-1.42383
37.5	-1.00391	-1.44629	-1.37207	-1.22949	-0.867188	-1.16992	-1.27148	-1.19531	-1.19531	-1.2793	-1.19727
38.5	-0.988281	-1.40625	-1.40332	-1.10547	-1.1582	-1.12891	-1.34961	-1.0918	-1.15234	-1.29883	-1.36523
39.5	-1.06934	-1.49512	-1.3584	-1.2832	-1.2207	-1.21582	-1.43652	-1.15234	-1.38672	-1.49609	-1.43359
40.5	-0.914063	-1.37305	-1.32715	-1.13379	-1.08789	-1.14746	-1.2041	-1.19141	-1.31445	-1.42578	-1.24219
41.5	-0.767578	-1.06738	-1.10156	-1.03027	-0.94043	-1.07422	-1.0752	-1.10352	-1.27539	-1.41211	-1.13281
42.5	-0.737305	-0.594727	-0.819336	-0.84082	-0.761719	-0.991211	-0.825195	-0.880859	-0.890625	-0.978516	-0.867188
43.5	0.102539	-0.22168	-0.0244141	-0.142578	-0.154297	-0.383789	-0.117188	-0.130859	0.0136719	-0.28125	0.136719
44.5	0.0322266	-0.136719	-0.0107422	-0.00684	0.0244141	-0.0664063	-0.142578	-0.0214844	0.132813	-0.0234375	-0.0742188
45.5	0.109375	-0.134766	-0.158203	0.0732422	0.0673828	-0.140625	0.0390625	-0.142578	0.105469	-0.0644531	-0.144531
46.5	0.185547	-0.0839844	-0.107422	-0.15918	-0.151367	-0.0224609	-0.0302734	0.00195	-0.0117188	-0.0839844	0.0371094
47.5	0.0361328	-0.115234	0.0644531	-0.102539	-0.0449219	0.00684	-0.0244141	-0.0488281	0.0996094	-0.0429688	0.00781
48.5	-0.000977	-0.0166016	0.0478516	-0.0986328	-0.0712891	0.00684	0.0722656	0.126953	-0.0253906	-0.0332031	0.0253906
49.5	-0.206055	-0.0654297	-0.141602	0.0244141	-0.0703125	-0.0234375	-0.126953	0.134766	-0.177734	-0.0722656	0.00977
50.5	-0.103516	0.0830078	-0.0234375	-0.0244141	-0.0146484	-0.0585938	0.0234375	-0.0332031	-0.15625	0.0351563	-0.078125
51.5	-0.131836	0.0371094	0.0126953	0.168945	0.104492	0.0273438	0.110352	-0.0273438	-0.0292969	0.0722656	-0.0234375
52.5	-0.0644531	0.196289	0.0703125	-0.0253906	0.104492	0.09375	0.0625	0.0195313	-0.00391	0.0898438	0.0253906
53.5	0.145508	0.236328	0.243164	0.15332	0.0537109	0.172852	0.015625	-0.0136719	0.0605469	0.128906	0.207031
54.5	0.0244141	0.191406	0.126953	0.112305	0.09375	0.213867	-0.111328	0.0625	-0.00391	0.152344	0.195313
55.5	-0.237305	0.0185547	0.0605469	-0.0253906	-0.0302734	0.0507813	-0.186523	-0.144531	-0.0527344	0.015625	-0.0410156
56.5	-0.242188	0.142578	0.217773	-0.108398	0.146484	-0.132813	-0.0585938	-0.0175781	-0.111328	0.0136719	-0.0996094
57.5	-0.0244141	0.130859	0.246094	0.21875	0.324219	0.170898	0.140625	0.0742188	-0.0214844	0.0742188	0.0214844
58.5	-0.25293	0.188477	0.25	0.208008	0.305664	0.0527344	0.0625	0.0625	0.132813	0.0996094	0.0527344
59.5	-0.132813	0.212891	0.240234	0.331055	0.3125	0.140625	0.0585938	0.126953	0.0722656	0.207031	0.128906
60.5	-0.120117	0.167969	0.293945	0.307617	0.292969	0.144531	0.0283203	0.0625	0.132813	0.0996094	0.0800781
61.5	-0.0722656	0.424805	0.404297	0.195313	0.324219	0.0117188	0.0390625	0.166016	-0.0507813	0.175781	0.271484
62.5	-0.271484	-2.56055	0.561523	0.566406	0.685547	0.418945	0.101563	0.203125	0.236328	0.337891	0.0742188
63.5	-3.99414	-5.03125	-13.9473	-3.08008	-4.37793	-2.9834	-19.666	-16.7168	-2.05664	-2.31055	-49.2227
64.5	2.61426	2.95898	-2.62891	-11.0527	-10.0117	-30.8594	9.1875	12.668	-0.78125	3.66211	108.789
65.5	1.78809	2.22266	-1.2041	-3.74512	0.142578	19.1094	39.7012	53.2207	78.8906	104.256	203.844
66.5	1.42285	4.39551	6.18457	10.0215	21.7549	35.5781	82.6084	110.209	149.016	196.445	313.275
67.5	0.792969	5.67969	10.3652	18.708	36.8477	62.3047	115.279	153.537	204.959	265.734	387.068
68.5	0.423828	6.96191	13.4873	25.3398	48.875	83.3887	143.758	190.934	251.605	320.971	443.164
69.5	0.00488	7.85156	16.3809	31.2842	59.6563	102.082	169.914	224.773	293.082	367.902	487.943
70.5	-0.311523	8.78613	19.0801	36.8809	69.8184	119.695	194.419	256.293	330.92	408.557	524.697
71.5	-0.489258	9.8457	21.6211	42.1289	79.5791	136.202	217.708	285.895	365.525	444.709	556.139
72.5	-0.723633	10.9004	24.1455	47.3232	89.0273	151.928	240.019	313.887	397.652	477.141	583.416
73.5	-0.772461	12.0742	26.6992	52.46	98.1279	167.548	261.628	340.539	427.494	506.232	607.385
74.5	-0.759766	13.1621	29.2588	57.3213	107.021	182.472	282.382	366.211	455.574	532.646	628.977
75.5	-0.71875	14.0322	32.0186	62.1357	115.714	197.022	302.609	390.789	481.691	556.795	648.398
76.5	-0.736328	15.2852	34.4287	66.8994	124.226	210.949	322.181	414.088	506.018	579.109	666.246
77.5	-0.75	16.2324	36.6758	71.5762	132.232	224.573	340.974	436.541	529.113	599.881	682.861
78.5	-0.714844	17.3369	39.0303	76.1074	140.322	237.886	359.292	458.25	550.805	619.223	698.479
79.5	-0.68457	18.4375	41.2578	80.498	148.233	250.771	377.126	479.178	571.512	637.732	713.002
80.5	-0.556641	19.5039	43.54	84.8027	156	263.583	394.517	499.271	591.25	654.947	726.619
81.5	-0.554688	20.4893	45.8193	89.1094	163.515	276.042	411.575	518.564	609.9	671.277	739.746
82.5	-0.526367	21.5986	48.0625	93.3809	170.938	288.287	428.343	537.379	627.738	686.902	752.01
83.5	-0.452148	22.5898	50.1514	97.5	178.265	300.34	444.38	555.555	644.936	701.629	763.666
84.5	-0.255859	23.5381	52.3789	101.484	185.385	312.025	460.161	573.303	661.26	715.904	775.021
85.5	-0.105469	24.5479	54.7129	105.638	192.668	323.537	475.604	590.533	677.07	729.471	785.879
86.5	-0.0742188	25.5713	56.8086	109.581	199.674	334.999	490.843	607.219	692.338	742.504	796.152
87.5	0.0820313	26.7109	58.8672	113.54	206.47	346.111	505.717	623.318	707.012	755.313	806.105
88.5	0.0439453	27.7402	61.0762	117.506	213.25	357.042	520.188	639.188	721.156	767.43	815.76
89.5	0.232422	28.6455	63.1006	121.404	219.901	367.95	534.278	654.395	734.984	779.057	825.115
90.5	0.301758	29.7148	65.0049	125.093	226.465	378.594	548.36	669.486	748.283	790.408	834.049
91.5	0.28125	30.6758	67.0947	128.958	232.957	389.167	561.981	684.006	761.139	801.498	842.814
92.5	0.535156	31.7246	68.959	132.723	239.423	399.398	575.404	698.287	773.758	812.246	851.461
93.5	0.441406	32.709	71.041	136.269	245.921	409.661	588.739	712.191	785.967	822.615	859.893
94.5	0.754883	33.6162	73.0645	139.909	251.971	419.595	601.734	725.787	797.793	832.814	868.16
95.5	0.837891	34.6436	75.1475	143.526	258.213	429.387	614.385	739.031	809.273	842.826	876.162
96.5	1.06348	35.4277	77.0713	147.025	264.277	439.042	626.869	752.061	820.633	852.313	884.08
97.5	1.03809	36.4609	78.9717	150.67	270.402	448.807	639.248	764.936	831.84	861.816	891.539
98.5	1.01855	37.4326	80.9355	154.004	276.443	458.443	651.354	777.32	842.516	871.117	899
99.5	1.19434	38.375	82.7266	157.564	282.308	467.708	663.359	789.623	853.105	880.227	906.318
100.5	1.25684	39.2773	84.4717	161.093	288.234	476.966	675.029	801.621	863.479	889.02	913.414
101.5	1.35547	40.0566	86.4854	164.311	294.045	486.232	686.76	813.432	873.707	897.725	920.547
102.5	1.40332	41.1484	88.2129	167.814	299.705	495.275	698.143	824.92	883.531	906.172	927.523
103.5	1.62207	42.0703	90.1934	171.136	305.388	504.2	709.611	836.533	893.287	914.703	934.352
104.5	1.74414	43.0957	91.9229	174.385	310.956	513.247	720.699	847.816	902.957	922.896	941.02
105.5	1.89063	43.9336	93.7969	177.714	316.649	521.941	731.615	858.803	912.393	930.969	947.566
106.5	2.05664	44.7217	95.5039	180.974	322.331	530.411	742.471	869.844	921.633	938.951	954.023
107.5	2.08301	45.6689	97.2168	184.184	327.689	538.969	753.203	880.578	930.809	946.689	960.395
108.5	2.24902	46.5166	99.1797	187.371	333.071	547.371	763.711	891.252	939.881	954.459	966.561
109.5	2.40918	47.582	100.852	190.491	338.465	555.721	774.031	901.623	948.678	962.1	972.836
110.5	2.47461	48.3291	102.549	193.75	343.704	563.986	784.48	911.941	957.207	969.531	978.654
111.5	2.56738	49.25	104.182	196.93	349.021	572.197	794.729	922.168	965.727	976.959	984.609
112.5	2.68555	50.0986	106.061	199.989	354.248	580.23	804.848	932.105	974.221	984.061	990.469
113.5	2.81641	51.0498	107.779	203.114	359.474	588.307	814.691	941.855	982.582	991.133	996.33
114.5	3.10645	52.0703	109.423	206.139	364.583	596.146	824.566	951.607	990.537	998.189	1002.25
115.5	3.03027	52.8115	111.126	209.203	369.797	604.011	834.258	961.275	998.68	1005.25	1008.05
116.5	3.12793	53.6777	112.896	212.309	374.973	611.897	843.795	970.689	1006.6	1012.21	1013.71
117.5	3.31641	54.6387	114.384	215.319	379.97	619.571	853.52	980.064	1014.57	1018.9	1019.33
118.5	3.30176	55.4277	116.093	218.163	384.918	627.269	862.783	989.367	1022.17	1025.55	1024.72
119.5	3.41797	56.1875	117.775	221.126	389.907	634.706	872.076	998.236	1029.83	1032.36	1030.15
120.5	3.66992	57.1406	119.462	224.025	394.63	642.255	881.264	1007.28	1037.48	1038.79	1035.55
121.5	3.65723	57.9736	121.179	226.949	399.479	649.787	890.348	1016.18	1044.91	1045.28	1040.95
122.5	3.92578	58.8291	122.808	229.88	404.346	657.075	899.266	1025.12	1052.32	1051.61	1046.2
123.5	4.0459	59.7607	124.571	232.748	409.396	664.325	908.156	1033.86	1059.6	1058.02	1051.34
124.5	4.12012	60.5166	126.095	235.773	414.034	671.534	916.924	1042.57	1066.83	1064.26	1056.43
125.5	4.13281	61.3984	127.636	238.728	418.821	678.678	925.648	1050.95	1073.89	1070.27	1061.57
126.5	4.13379	62.1191	129.244	241.409	423.451	685.867	934.279	1059.28	1080.81	1076.67	1066.53
127.5	4.42383	63.0205	130.871	244.131	428.111	692.942	942.75	1067.54	1087.92	1082.66	1071.59
128.5	4.39355	63.8672	132.354	246.982	432.762	699.724	951.24	1075.58	1094.38	1088.62	1076.47
129.5	4.65332	64.5879	133.836	249.707	437.158	706.59	959.541	1083.52	1101.05	1094.46	1081.19
130.5	4.73242	65.3447	135.36	252.196	441.716	713.309	967.393	1091.36	1107.65	1100.39	1085.94
131.5	4.84473	66.0322	136.712	254.842	446.113	719.976	975.326	1098.98	1113.9	1105.82	1090.66
132.5	4.90625	66.7305	138.313	257.412	450.37	726.388	983.164	1106.63	1120.36	1111.38	1095.1
133.5	5.14063	67.585	139.745	260.179	454.509	732.851	990.803	1113.98	1126.54	1116.97	1099.64
134.5	5.24023	68.3857	141.153	262.696	458.839	739.241	998.367	1121.37	1132.59	1122.45	1103.93
135.5	5.29688	69.1328	142.733	265.115	462.972	745.435	1006	1128.68	1138.64	1127.65	1108.35
136.5	5.3457	69.8359	144.187	267.68	467.185	751.641	1013.41	1135.87	1144.68	1132.78	1112.94
137.5	5.43555	70.4736	145.589	270.267	471.358	757.748	1020.92	1143.19	1150.48	1138.01	1117.18
138.5	5.60059	71.2236	147.01	272.574	475.622	763.87	1028.22	1150.14	1156.37	1143.41	1121.47
139.5	5.55469	71.9619	148.292	274.949	479.73	769.908	1035.18	1156.91	1162.15	1148.44	1125.77
140.5	5.77832	72.7441	149.717	277.491	483.664	775.848	1042.5	1163.82	1167.85	1153.51	1130.04
141.5	5.7998	73.4746	151.056	279.792	487.626	781.823	1049.63	1170.62	1173.57	1158.67	1134.3
142.5	5.9834	74.2295	152.507	282.291	491.485	787.675	1056.59	1177.37	1179.22	1163.91	1138.32
143.5	5.90039	74.7715	153.849	284.499	495.406	793.447	1063.52	1184.19	1184.8	1168.89	1142.57
144.5	6.04297	75.5791	155.306	286.943	499.354	799.286	1070.5	1190.79	1190.41	1173.84	1146.56
145.5	6.33301	76.2441	156.444	289.221	503.299	804.981	1077.44	1197.19	1196	1178.8	1150.74
146.5	6.26953	77.1416	157.891	291.804	507.094	810.705	1084.32	1203.83	1201.43	1183.7	1154.78
147.5	6.5166	77.7393	159.074	294.074	511.168	816.31	1090.94	1210.29	1206.87	1188.58	1158.9
148.5	6.75684	78.3828	160.467	296.329	514.791	821.988	1097.71	1216.69	1212.19	1193.51	1162.96
149.5	6.74902	79.0547	161.756	298.632	518.685	827.629	1104.26	1223.04	1217.57	1198.14	1166.81
150.5	7.02637	79.6523	163.176	301.003	522.504	833.016	1110.92	1229.32	1222.82	1202.98	1170.88
151.5	7.07031	80.4111	164.476	303.352	526.208	838.517	1117.55	1235.61	1228.16	1207.74	1174.81
152.5	7.25684	81.2461	165.848	305.542	529.826	844.164	1124	1241.69	1233.33	1212.3	1178.76
153.5	7.32324	81.7783	167.114	307.699	533.5	849.413	1130.43	1247.86	1238.43	1216.95	1182.58
154.5	7.34961	82.4824	168.454	310.059	537.482	854.75	1136.92	1253.99	1243.49	1221.72	1186.56
155.5	7.49707	83.3037	169.703	312.306	541.047	860.13	1143.38	1259.98	1248.75	1226.38	1190.3
156.5	7.60645	84.0664	171.158	314.564	544.648	865.633	1149.68	1266.09	1253.86	1230.89	1193.99
157.5	7.7959	84.8789	172.603	316.746	548.406	870.866	1156	1272.01	1258.66	1235.57	1197.79
158.5	7.87109	85.4258	173.782	319.1	551.992	876.082	1162.33	1278.03	1263.84	1240.31	1201.56
159.5	8.03125	86.1689	175.218	321.268	555.441	881.342	1168.58	1283.94	1268.8	1244.81	1205.08
160.5	8.07324	86.7412	176.502	323.612	559.032	886.55	1174.71	1289.73	1273.86	1249.24	1208.79
161.5	8.36523	87.4443	177.715	325.668	562.678	891.62	1180.87	1295.56	1278.76	1253.49	1212.19
162.5	8.56543	88.1143	179.048	327.786	566.18	896.839	1186.83	1301.37	1283.61	1257.95	1215.7
163.5	8.58203	88.8027	180.211	330.111	569.654	901.8	1192.99	1307.11	1288.32	1262.34	1219.27
164.5	8.71484	89.625	181.498	332.227	573.076	907.019	1199.11	1312.87	1293.18	1266.71	1222.81
165.5	8.79297	90.2129	182.795	334.229	576.525	912.053	1205.03	1318.41	1297.95	1270.89	1226.31
166.5	8.85352	90.9121	183.996	336.335	580.012	917.031	1210.98	1324	1302.71	1275.23	1229.8
167.5	9.14551	91.5771	185.352	338.689	583.354	921.909	1216.83	1329.76	1307.52	1279.28	1233.37
168.5	9.22656	92.249	186.4	340.835	586.86	926.926	1222.71	1335.25	1312.21	1283.48	1237.02
169.5	9.32715	92.9492	187.641	342.812	590.204	931.835	1228.74	1340.87	1316.71	1287.73	1240.44
170.5	9.38477	93.5684	188.849	344.947	593.606	936.697	1234.56	1346.37	1321.38	1291.88	1243.96
171.5	9.75	94.042	190.105	347.045	597.023	941.684	1240.26	1351.9	1326.17	1296.03	1247.38
172.5	9.67871	94.7549	191.27	349.101	600.424	946.601	1246.19	1357.24	1330.82	1300.18	1250.97
173.5	9.94531	95.3555	192.625	351.222	603.727	951.43	1251.82	1362.81	1335.5	1304.38	1254.38
174.5	10.0703	96.0137	193.646	353.321	607.118	956.181	1257.53	1368.18	1339.89	1308.54	1257.72
175.5	10.124	96.6973	195.031	355.145	610.435	960.9	1263.23	1373.57	1344.4	1312.49	1261.17
176.5	10.3965	97.4248	196.238	357.359	613.614	965.719	1268.98	1378.81	1349	1316.57	1264.64
177.5	10.4111	98.1016	197.397	359.419	616.891	970.288	1274.61	1384.14	1353.47	1320.76	1267.78
178.5	10.5049	98.7627	198.472	361.407	620.302	974.973	1280.2	1389.39	1357.92	1324.76	1270.83
179.5	10.5977	99.3311	199.796	363.446	623.583	979.742	1285.62	1394.17	1362.43	1328.74	1275.38
180.5	10.8066	99.9961	200.929	365.413	626.689	984.246	1291.23	1399.1	1366.95	1332.64	1280.71
181.5	10.7471	100.528	202.118	367.434	629.881	988.681	1296.88	1404.22	1371.46	1336.54	1284.1
182.5	10.9453	101.305	203.248	369.332	633.153	993.29	1302.17	1409.48	1375.69	1340.41	1287.52
183.5	10.9316	101.831	204.471	371.428	636.36	998.06	1307.57	1414.49	1380.08	1344.45	1290.84
184.5	11.1377	102.555	205.475	373.372	639.43	1002.57	1313.02	1419.63	1384.44	1348.43	1294.17
185.5	11.2012	103.066	206.654	375.281	642.635	1007.05	1318.43	1424.69	1388.81	1352.56	1297.39
186.5	11.3184	103.683	207.791	377.355	645.806	1011.53	1323.68	1429.81	1393.19	1356.43	1300.64
187.5	11.2686	104.479	209.007	379.283	648.92	1015.93	1329.02	1434.74	1397.5	1360.29	1303.9
188.5	11.4824	104.96	209.952	381.136	652.03	1020.52	1334.39	1439.82	1401.73	1364.1	1307.18
189.5	11.54	105.636	211.26	383.05	655.052	1024.89	1339.59	1444.7	1405.81	1368.07	1310.39
190.5	11.7207	106.079	212.481	385.062	658.155	1029.27	1344.93	1449.65	1410.06	1371.92	1313.61
191.5	11.6699	106.794	213.563	386.984	661.174	1033.55	1350.09	1454.79	1414.31	1375.69	1316.88
192.5	11.6895	107.375	214.631	388.963	664.226	1037.97	1355.38	1459.65	1418.44	1379.28	1320.09
193.5	11.9473	108.073	215.878	390.762	667.384	1042.32	1360.51	1464.51	1422.75	1383.3	1323.3
194.5	11.9707	108.551	216.977	392.695	670.286	1046.62	1365.55	1469.35	1426.9	1387.12	1326.51
195.5	11.9229	109.364	218.065	394.678	673.346	1051.04	1370.75	1474.07	1430.97	1390.7	1329.63
196.5	12.0332	109.875	219.285	396.571	676.264	1055.34	1375.73	1478.84	1435.15	1394.53	1332.88
197.5	12.1553	110.363	220.461	398.389	679.213	1059.43	1380.78	1483.69	1439.29	1398.19	1335.88
198.5	12.1357	110.904	221.5	400.148	682.287	1063.65	1385.85	1488.45	1443.31	1401.9	1338.98
199.5	12.3447	111.473	222.618	402.094	685.31	1067.84	1390.74	1493.11	1447.28	1405.7	1342.11
200.5	12.4707	112.111	223.654	404.083	688.142	1071.94	1395.74	1497.8	1451.3	1409.22	1345.15
201.5	12.6045	112.676	224.809	405.98	691.054	1076.07	1400.79	1502.44	1455.38	1412.91	1348.14
202.5	12.6494	113.274	225.923	407.735	693.94	1080.29	1405.76	1507.01	1459.46	1416.44	1351.05
203.5	12.5645	113.943	226.989	409.435	696.784	1084.52	1410.54	1511.62	1463.29	1420.06	1354.03
204.5	12.8418	114.436	228.02	411.473	699.729	1088.5	1415.37	1516.25	1467.28	1423.62	1356.85
205.5	12.8945	114.948	229.127	413.166	702.561	1092.72	1420.28	1520.85	1471.2	1427.34	1360
206.5	12.8047	115.497	230.254	414.866	705.37	1096.71	1425.04	1525.31	1475.13	1431.03	1363.01
207.5	12.918	116.194	231.308	416.606	708.306	1100.8	1429.66	1529.81	1478.99	1434.6	1366.06
208.5	12.9727	116.762	232.393	418.529	711.068	1104.82	1434.55	1534.19	1483.07	1438.1	1369
209.5	12.9443	117.328	233.458	420.232	713.92	1108.73	1439.36	1538.74	1486.88	1441.5	1372.05
210.5	13.0703	117.863	234.412	422.068	716.791	1112.82	1444.11	1543.01	1490.88	1444.96	1375.09
211.5	13.1162	118.371	235.508	423.961	719.485	1116.73	1448.83	1547.54	1494.67	1448.58	1377.83
212.5	10.5596	116.729	233.23	424.691	720.295	1120.42	1450.71	1549.91	1497.97	1450.96	1378.39
213.5	14.1494	122.767	252.047	442.646	752.753	1147.02	1489.3	1604.21	1546.26	1527.91	1468.35
214.5	14.2646	122.587	242.002	430.461	714.409	1126.1	1444.87	1530.51	1478.36	1405.75	1324.42
215.5	13.9463	120.515	240.048	431.448	726.844	1129.91	1446.22	1547.35	1486.67	1435.8	1346.86
216.5	13.9258	119.673	236.899	425.212	718.703	1116.85	1434.03	1531.3	1466.78	1413.36	1323.06
217.5	14.2021	119.239	235.441	422.02	714.084	1109.37	1425.56	1520.81	1454.13	1399.44	1308.18
218.5	14.3232	118.789	234.371	419.636	710.5	1103.65	1418.19	1512.39	1443.92	1388.54	1296.44
219.5	14.2813	118.373	232.979	417.458	706.785	1098.52	1411.36	1504.63	1435.01	1378.62	1285.96
220.5	14.3682	118.01	232.194	415.465	703.903	1093.78	1405.55	1497.74	1426.86	1370.3	1276.86
221.5	14.0146	117.472	230.98	413.643	700.76	1089.26	1399.83	1490.85	1419.21	1362.36	1268.13
222.5	13.7637	116.851	229.529	411.42	697.608	1084.88	1394.18	1484.1	1411.78	1354.61	1259.81
223.5	13.4092	116.496	228.623	409.443	694.507	1080.7	1388.87	1478.19	1404.98	1347.65	1252.54
224.5	13.3145	116.116	227.813	407.843	692.192	1076.95	1384.3	1472.73	1398.92	1341.29	1245.94
225.5	13.5352	115.857	227.192	406.521	689.976	1073.5	1380	1467.88	1393.33	1335.62	1239.83
226.5	13.4736	115.423	226.452	405.367	687.674	1070.24	1375.71	1463.09	1388.1	1330.02	1233.69
227.5	13.3496	115.2	225.813	403.902	685.577	1066.98	1371.48	1458.38	1382.97	1324.67	1228.13
228.5	13.2666	114.761	225.08	402.621	683.425	1063.7	1367.5	1454.03	1378.1	1319.68	1222.8
229.5	13.5303	114.65	224.461	401.392	681.369	1060.89	1363.99	1449.92	1373.37	1314.87	1217.92
230.5	13.3682	114.4	223.887	400.247	679.516	1058.15	1360.28	1445.79	1368.89	1310.2	1213.1
231.5	13.6416	114.228	223.463	399.128	677.721	1055.47	1356.65	1441.82	1364.66	1305.93	1208.43
232.5	13.4814	114.01	222.912	398.028	675.789	1052.75	1353.53	1438.16	1360.71	1301.77	1204.01
233.5	13.5527	113.78	222.28	396.896	674.119	1050.04	1350.14	1434.49	1356.68	1297.62	1199.77
234.5	13.5342	113.512	221.851	395.775	672.474	1047.59	1346.98	1430.89	1352.77	1293.75	1195.54
235.5	13.2979	113.354	221.237	394.667	670.606	1044.95	1343.79	1427.51	1349.02	1289.91	1191.67
236.5	13.5078	113.306	220.878	393.806	669.077	1042.68	1341.08	1424.34	1345.51	1286.29	1187.98
237.5	14.3545	113.494	220.798	393.403	668.439	1040.74	1338.89	1422.04	1342.76	1283.47	1185.04
238.5	13.3008	112.462	219.395	392.014	665.911	1038.7	1335.16	1418.38	1339.04	1279.65	1180.23
239.5	13.1865	111.779	218.78	390.495	664.185	1035.66	1332.44	1414.96	1335.12	1275.69	1176.68
240.5	2.60156	102.817	206.869	383.513	654.541	1029.12	1321.53	1404.25	1326.06	1266.37	1164.62
241.5	19.71	118.09	223.559	386.922	664.539	1028.17	1332	1412.89	1329.32	1270.1	1178.51
242.5	16.1045	113.279	220.159	393.506	664.285	1036.12	1329.49	1411.53	1332.28	1272.65	1172.31
243.5	13.8477	111.664	218.089	388.75	660.257	1029.73	1324.15	1405.42	1325.13	1265.52	1166.53
244.5	13.1738	111.09	216.951	387.268	658.53	1026.76	1320.82	1402.03	1321.42	1261.83	1162.56
245.5	12.9541	110.779	216.401	386.069	656.789	1024.63	1318.27	1399.1	1317.98	1258.57	1159.13
246.5	12.9951	110.739	215.896	385.186	655.571	1022.69	1315.82	1396.32	1315.08	1255.61	1156.18
247.5	12.9941	110.383	215.522	384.485	654.444	1020.86	1313.64	1393.95	1312.48	1252.75	1153.15
248.5	13.0459	110.142	215.076	383.648	652.913	1018.82	1311.3	1391.24	1309.76	1249.95	1150.31
249.5	12.9209	110.222	214.67	382.863	651.532	1016.94	1308.91	1388.62	1306.93	1247.1	1147.46
250.5	13.4102	109.926	214.916	382.463	651.214	1015.7	1307.51	1386.74	1304.63	1244.92	1145.3
251.5	12.3135	109.021	213.225	381.238	648.629	1013.29	1304.07	1383.68	1301.53	1241.5	1141.39
252.5	12.0908	108.735	212.711	379.752	647.362	1011	1301.87	1380.7	1298.38	1238.6	1138.76
253.5	11.9824	108.472	212.229	379.015	646.174	1009.51	1299.83	1378.5	1295.95	1236.03	1136
254.5	12.167	108.285	211.904	378.435	645.033	1007.76	1297.5	1376.23	1293.51	1233.59	1133.57
255.5	12.0674	108.089	211.548	377.802	643.913	1006.1	1295.75	1373.96	1291.1	1231.25	1131.13
256.5	12.1172	108.074	211.315	376.979	642.849	1004.7	1293.66	1371.86	1288.8	1228.93	1128.67
257.5	12.1826	107.956	210.879	376.36	641.76	1003.11	1291.8	1369.83	1286.6	1226.6	1126.07
258.5	12.0234	108.002	210.558	375.85	640.689	1001.6	1289.94	1367.68	1284.41	1224.42	1123.83
259.5	12.0273	107.85	210.351	375.046	639.584	1000.07	1287.98	1365.76	1282.32	1222.11	1121.34
260.5	11.9668	107.53	209.932	374.411	638.707	998.419	1286.22	1363.7	1279.93	1219.91	1118.99
261.5	12.0166	107.44	209.568	373.833	637.66	997.111	1284.4	1361.75	1277.86	1217.62	1116.68
262.5	11.8477	107.369	209.246	373.213	636.565	995.508	1282.76	1359.74	1275.78	1215.63	1114.65
263.5	11.625	107.101	208.801	372.58	635.645	994.163	1280.87	1357.97	1273.74	1213.57	1112.33
264.5	11.8408	107.058	208.602	371.979	634.573	992.747	1279.06	1355.99	1271.65	1211.39	1110.09
265.5	11.7471	106.905	208.268	371.652	633.608	991.304	1277.44	1354.03	1269.68	1209.45	1108.13
266.5	11.6221	106.672	207.902	370.866	632.622	990.109	1275.71	1352.25	1267.64	1207.33	1106.13
267.5	11.667	106.524	207.679	370.232	631.605	988.6	1274.08	1350.32	1265.66	1205.39	1104.23
268.5	11.5371	106.34	207.345	369.602	630.705	987.374	1272.5	1348.67	1263.88	1203.26	1102.03
269.5	11.5576	106.235	207.005	369.056	629.785	986.009	1270.89	1346.84	1261.83	1201.27	1100.25
270.5	11.4766	106.184	206.827	368.508	628.965	984.68	1269.21	1345.02	1259.94	1199.48	1098.36
271.5	11.4453	106.006	206.559	368.203	628.222	983.508	1267.62	1343.29	1258.06	1197.61	1096.4
272.5	11.5117	105.893	206.302	367.498	627.237	982.171	1266.11	1341.56	1256.23	1195.89	1094.45
273.5	11.2275	105.751	205.913	366.821	626.44	981.056	1264.56	1339.95	1254.53	1193.9	1092.61
274.5	11.249	105.631	205.521	366.338	625.519	979.907	1263.2	1338.21	1252.87	1192.17	1090.79
275.5	11.3584	105.669	205.398	365.892	624.73	978.783	1261.67	1336.69	1251.1	1190.46	1088.85
276.5	11.251	105.471	205.065	365.126	623.934	977.532	1260.21	1334.95	1249.4	1188.72	1087.07
277.5	11.3838	105.304	204.905	364.814	623.117	976.271	1258.68	1333.48	1247.82	1187.02	1085.42
278.5	11.2754	105.22	204.603	364.354	622.186	975.082	1257.38	1331.99	1246.13	1185.27	1083.72
279.5	11.1777	105.175	204.457	363.856	621.324	974.098	1255.93	1330.26	1244.47	1183.63	1081.97
280.5	11.3408	105.16	204.173	363.295	620.561	973.002	1254.47	1328.77	1242.94	1181.98	1080.16
281.5	11.1885	105.01	203.929	362.811	619.839	971.815	1253.28	1327.18	1241.3	1180.47	1078.61
282.5	11.3457	104.946	203.683	362.337	619.184	970.753	1251.8	1325.86	1239.7	1178.72	1076.86
283.5	11.1729	104.763	203.314	362.003	618.398	969.629	1250.54	1324.31	1238.14	1177.26	1075.09
284.5	11.1387	104.629	203.073	361.338	617.569	968.413	1249.24	1322.87	1236.53	1175.66	1073.53
285.5	11.2568	104.65	202.783	360.857	616.852	967.421	1247.92	1321.44	1235.07	1174.02	1071.97
286.5	11.3115	104.465	202.564	360.463	616.028	966.442	1246.46	1320.01	1233.3	1172.37	1070.31
287.5	11.2021	104.301	202.358	359.946	615.307	965.402	1245.26	1318.61	1231.87	1170.92	1068.82
288.5	11.0244	104.158	202.249	359.512	614.497	964.335	1243.93	1317.04	1230.47	1169.44	1067.29
289.5	11.0547	104.057	202.054	359.085	613.705	963.264	1242.63	1315.87	1229.02	1167.86	1065.84
290.5	10.9971	103.862	201.733	358.346	612.931	962.243	1241.46	1314.43	1227.29	1166.37	1064.24
291.5	10.9326	103.935	201.486	358.101	612.496	961.278	1240.29	1313.07	1225.99	1164.87	1062.73
292.5	10.9521	103.687	201.248	357.681	611.592	960.276	1239.08	1311.81	1224.51	1163.5	1061.34
293.5	10.9063	103.538	200.953	357.302	610.884	959.269	1237.67	1310.42	1223.12	1162.07	1059.81
294.5	10.8369	103.601	200.665	356.761	610.248	958.419	1236.45	1309.12	1221.87	1160.61	1058.38
295.5	10.8154	103.46	200.459	356.342	609.619	957.314	1235.27	1307.71	1220.35	1159.35	1056.91
296.5	10.8027	103.309	200.146	355.972	609.022	956.483	1234.11	1306.57	1218.99	1157.92	1055.71
297.5	10.8223	103.109	199.939	355.646	608.148	955.486	1232.98	1305.25	1217.77	1156.6	1054.18
298.5	10.8867	103.07	199.719	355.232	607.746	954.752	1231.76	1303.91	1216.41	1155.28	1052.82
299.5	10.9971	103.034	199.563	354.974	606.936	953.665	1230.77	1302.76	1215.05	1153.75	1051.49
300.5	11.0098	103.065	199.446	354.484	606.293	953.073	1229.56	1301.51	1213.75	1152.48	1050.12
301.5	10.9746	102.956	199.295	354.056	605.67	952.066	1228.4	1300.43	1212.6	1151.19	1048.78
302.5	11.0059	102.731	199.023	353.723	605.074	951.096	1227.37	1299.35	1211.22	1149.93	1047.41
303.5	10.7285	102.771	198.881	353.381	604.61	950.318	1226.33	1297.99	1210.01	1148.7	1046.1
304.5	10.6133	102.687	198.545	352.919	603.972	949.531	1225.42	1296.82	1208.79	1147.29	1044.85
305.5	10.6025	102.695	198.476	352.532	603.273	948.608	1224.36	1295.66	1207.45	1146.09	1043.56
306.5	10.6172	102.603	198.25	352.021	602.73	947.589	1223.11	1294.42	1206.19	1144.86	1042.18
307.5	10.5684	102.462	197.987	351.893	602.003	946.929	1222.12	1293.18	1204.89	1143.63	1040.85
308.5	10.5977	102.304	197.879	351.436	601.394	945.897	1220.9	1292.16	1203.83	1142.48	1039.59
309.5	10.6855	102.371	197.689	350.967	600.955	945.151	1219.88	1291.05	1202.47	1141.25	1038.37
310.5	10.5596	102.26	197.264	350.809	600.236	944.309	1218.98	1289.96	1201.28	1140.01	1037.18
311.5	10.6826	102.154	197.223	350.354	599.819	943.52	1218.07	1288.93	1200.17	1138.77	1035.91
312.5	10.4414	101.973	196.968	349.918	599.104	942.596	1216.96	1287.6	1198.87	1137.51	1034.57
313.5	10.3887	101.979	196.799	349.516	598.546	941.562	1215.99	1286.45	1197.72	1136.56	1033.53
314.5	10.5254	101.732	196.584	349.265	597.927	941.045	1214.93	1285.57	1196.54	1135.25	1032.27
315.5	10.5537	101.663	196.383	348.965	597.257	940.285	1214.02	1284.45	1195.28	1133.99	1030.97
316.5	10.4961	101.654	196.223	348.73	596.791	939.322	1213.08	1283.4	1194.27	1132.84	1029.84
317.5	10.6191	101.638	196.005	348.27	596.118	938.624	1211.98	1282.29	1193.16	1131.79	1028.8
318.5	10.458	101.505	195.938	347.822	595.66	937.904	1211.11	1281.2	1192.02	1130.65	1027.6
319.5	10.3965	101.546	195.723	347.601	595.247	937.21	1210.1	1280.23	1190.86	1129.5	1026.49
320.5	10.376	101.471	195.48	347.223	594.659	936.311	1209.22	1279.16	1189.91	1128.46	1025.5
321.5	10.4033	101.308	195.373	347.005	594.177	935.329	1208.33	1278.16	1188.91	1127.27	1024.46
322.5	10.5264	101.385	195.311	346.588	593.698	934.839	1207.32	1277.05	1187.85	1126.25	1023.35
323.5	10.4238	101.106	195.151	346.237	593.194	934.09	1206.58	1276.19	1186.57	1125.2	1022.21
324.5	10.4414	101.177	194.901	345.965	592.566	933.35	1205.77	1275.28	1185.73	1124.11	1021.05
325.5	10.4668	101.177	194.792	345.569	592.259	932.623	1204.89	1274.35	1184.7	1123.03	1019.96
326.5	10.5498	101.136	194.608	345.186	591.667	931.943	1203.9	1273.36	1183.63	1121.86	1018.86
327.5	10.3516	100.984	194.529	344.959	591.087	931.278	1202.99	1272.24	1182.53	1120.86	1017.82
328.5	10.1924	100.892	194.178	344.56	590.652	930.454	1202.08	1271.22	1181.4	1119.73	1016.72
329.5	10.2324	100.868	194.027	344.267	590.111	929.826	1201.24	1270.39	1180.36	1118.85	1015.56
330.5	10.3545	100.762	193.802	343.977	589.522	928.996	1200.41	1269.52	1179.62	1117.78	1014.56
331.5	10.3379	100.566	193.72	343.773	589.071	928.407	1199.52	1268.64	1178.49	1116.84	1013.55
332.5	10.2109	100.699	193.677	343.474	588.515	927.685	1198.64	1267.29	1177.55	1115.69	1012.4
333.5	10.1953	100.538	193.498	343.152	588.061	927.057	1197.81	1266.59	1176.33	1114.84	1011.56
334.5	10.1162	100.48	193.115	342.809	587.588	926.308	1197.06	1265.53	1175.44	1113.83	1010.39
335.5	10.0371	100.434	192.866	342.506	587.214	925.606	1196.05	1264.54	1174.67	1112.89	1009.45
336.5	9.94043	100.297	192.912	342.176	586.713	924.912	1195.42	1263.83	1173.73	1111.92	1008.48
337.5	10.165	100.262	192.675	341.861	586.218	924.378	1194.57	1262.66	1172.82	1110.94	1007.38
338.5	10.125	100.083	192.597	341.751	585.82	923.764	1193.72	1261.96	1171.81	1109.88	1006.57
339.5	10.207	100.141	192.524	341.389	585.312	923.094	1192.98	1261.13	1170.9	1108.96	1005.65
340.5	10.0117	100.156	192.286	341.172	584.781	922.502	1192.21	1260.22	1169.96	1108	1004.59
341.5	10.1328	100.129	192.188	340.674	584.424	921.84	1191.54	1259.27	1169.1	1107.1	1003.73
342.5	9.9873	100.119	192.167	340.387	583.89	921.125	1190.59	1258.6	1168.13	1106.29	1002.72
343.5	10.0186	100.097	191.977	340.286	583.408	920.646	1189.86	1257.57	1167.17	1105.42	1001.92
344.5	10.1113	100.07	191.718	339.984	583.055	919.915	1189.21	1256.68	1166.33	1104.46	1000.84
345.5	10.1289	99.9697	191.496	339.737	582.65	919.225	1188.33	1255.84	1165.52	1103.47	999.822
346.5	9.78613	99.7939	191.512	339.34	582.209	918.553	1187.57	1255.14	1164.62	1102.56	999.021
347.5	9.81836	99.9346	191.241	339.144	581.872	917.877	1186.72	1254.24	1163.85	1101.64	998.178
348.5	9.78516	99.7861	191.123	338.656	581.404	917.367	1185.98	1253.36	1162.79	1100.77	997.145
349.5	9.82715	99.707	191.114	338.476	580.873	916.629	1185.15	1252.67	1161.73	1099.86	996.314
350.5	9.80957	99.6855	190.834	338.287	580.497	916.111	1184.6	1251.84	1160.93	1099	995.332
351.5	9.76758	99.4961	190.51	338.176	579.994	915.472	1183.76	1251.1	1159.95	1098.15	994.445
352.5	9.74609	99.6172	190.575	337.758	579.61	914.966	1183.15	1250.22	1159.29	1097.25	993.576
353.5	9.73828	99.4902	190.251	337.346	579.041	914.364	1182.2	1249.2	1158.54	1096.21	992.727
354.5	9.63184	99.4414	190.196	337.056	578.9	913.764	1181.43	1248.54	1157.69	1095.32	991.738
355.5	9.56152	99.3936	190.088	336.809	578.486	913.176	1180.82	1247.74	1156.8	1094.49	990.908
356.5	9.58203	99.3096	189.966	336.739	578.224	912.633	1179.99	1246.9	1155.87	1093.43	990.086
357.5	9.63281	99.2764	189.871	336.401	577.77	912.082	1179.31	1246.07	1154.97	1092.83	989.262
358.5	9.58887	99.4492	189.737	336.253	577.291	911.407	1178.62	1245.39	1154.32	1091.99	988.41
359.5	9.59473	99.1934	189.554	335.97	576.913	910.848	1177.88	1244.62	1153.35	1091.08	987.477
360.5	9.58496	99.2637	189.406	335.575	576.368	910.315	1177.26	1243.72	1152.62	1090.3	986.648
361.5	9.5332	99.1709	189.309	335.428	576.181	909.728	1176.59	1243.04	1151.85	1089.45	985.799
362.5	9.55371	99.1055	189.28	335.255	575.713	909.281	1175.94	1242.22	1150.96	1088.64	985.029
363.5	9.56055	99.0879	189.102	334.828	575.237	908.771	1175.22	1241.5	1150.18	1087.89	984.264
364.5	9.56934	99.0439	189.113	334.704	574.873	908.199	1174.55	1240.79	1149.43	1087.02	983.373
365.5	9.36621	99.1182	188.964	334.585	574.666	907.646	1173.88	1240.08	1148.53	1086.21	982.531
366.5	9.4502	99.0342	188.915	334.281	574.175	907.214	1173.11	1239.35	1147.84	1085.29	981.813
367.5	9.55762	99.0146	188.833	333.854	573.793	906.638	1172.66	1238.5	1147.08	1084.58	980.92
368.5	9.44531	98.9941	188.64	333.657	573.477	905.956	1171.85	1237.81	1146.29	1083.97	980.227
369.5	9.4502	99.0283	188.461	333.479	573.123	905.521	1171.34	1236.97	1145.59	1082.99	979.328
370.5	9.4043	98.8271	188.279	333.229	572.619	904.831	1170.48	1236.3	1144.85	1082.14	978.531
371.5	9.38477	98.6475	188.209	333.152	572.308	904.356	1169.89	1235.71	1143.99	1081.37	977.83
372.5	9.29785	98.6289	188.127	332.816	571.832	903.979	1169.29	1234.88	1143.12	1080.81	976.984
373.5	9.27734	98.6104	188.054	332.655	571.513	903.372	1168.6	1234.26	1142.35	1080.1	976.098
374.5	9.27637	98.5264	187.934	332.367	571.299	902.88	1167.97	1233.51	1141.7	1079.36	975.309
375.5	9.13281	98.5742	187.722	331.951	570.69	902.296	1167.35	1232.75	1140.9	1078.4	974.576
376.5	9.16309	98.3398	187.552	331.808	570.254	901.726	1166.69	1231.86	1140.19	1077.6	973.947
377.5	9.22168	98.3447	187.339	331.652	569.94	901.309	1166.04	1231.26	1139.4	1076.87	972.945
378.5	9.28809	98.2852	187.261	331.357	569.722	900.854	1165.43	1230.64	1138.63	1076.26	972.342
379.5	9.21191	98.2314	187.252	331.239	569.256	900.351	1164.86	1229.84	1137.88	1075.35	971.49
380.5	9.0752	98.1387	187.125	330.911	568.909	899.816	1164.17	1229.07	1137.23	1074.78	970.701
381.5	9.28418	98.1553	186.959	330.802	568.469	899.358	1163.42	1228.44	1136.4	1074.08	970.02
382.5	9.26855	98.1826	186.882	330.542	568.277	898.907	1162.97	1227.96	1135.93	1073.41	969.236
383.5	9.27246	98.125	186.804	330.318	567.9	898.44	1162.46	1227.2	1135.16	1072.69	968.598
384.5	9.45215	98.0977	186.607	330.178	567.559	897.993	1161.58	1226.38	1134.4	1071.86	967.854
385.5	9.31934	98.1162	186.694	330.032	567.182	897.464	1161.07	1225.72	1133.88	1071.12	967.098
386.5	9.27539	97.958	186.57	329.733	566.904	896.969	1160.55	1225.15	1133.2	1070.6	966.604
387.5	9.2002	97.9834	186.268	329.478	566.474	896.507	1159.89	1224.5	1132.4	1069.89	965.811
388.5	9.16504	98.0635	186.453	329.222	566.207	895.977	1159.41	1223.87	1131.74	1069.2	964.809
389.5	9.22266	97.793	186.222	329.007	565.946	895.552	1158.8	1223.23	1131	1068.34	964.244
390.5	9.15039	97.7275	186.215	328.874	565.516	894.964	1158.34	1222.62	1130.28	1067.78	963.646
391.5	9.05664	97.79	185.94	328.522	565.19	894.576	1157.74	1221.98	1129.64	1066.86	962.887
392.5	9.05957	97.8926	186.026	328.298	564.935	893.996	1157.08	1221.3	1129.1	1066.45	962.113
393.5	9.17188	97.6865	185.909	328.203	564.586	893.537	1156.44	1220.55	1128.2	1065.65	961.273
394.5	9.01953	97.582	185.584	328.043	564.172	892.938	1155.81	1220.04	1127.55	1065.08	960.688
395.5	9.37109	98.0889	185.882	327.693	563.886	892.421	1155.61	1219.24	1126.87	1064.24	960.094
396.5	8.19141	96.5283	184.809	327.551	563.616	892.245	1153.73	1218.8	1126.11	1063.59	958.504
397.5	8.29492	96.7705	184.821	326.579	562.656	890.527	1152.91	1217.2	1124.29	1061.53	956.93
398.5	8.28809	96.6133	184.495	326.464	562.255	890.446	1152.03	1216.61	1123.76	1060.92	956.377
399.5	8.27441	96.6953	184.543	326.188	561.885	889.757	1151.47	1215.8	1122.95	1060.04	955.635
400.5	8.42383	96.8672	184.535	326.187	561.714	889.391	1150.91	1215.25	1122.45	1059.47	955.043
401.5	8.38867	96.9824	184.514	326.215	561.528	889.005	1150.51	1214.69	1121.86	1059.04	954.504
402.5	8.27832	97.1064	184.47	326.171	561.402	888.726	1149.92	1214.11	1121.23	1058.43	953.879
403.5	8.53809	96.9971	184.528	325.906	560.898	888.213	1149.41	1213.64	1120.57	1057.67	953.238
404.5	8.5498	96.9854	184.334	325.668	560.602	887.653	1148.68	1212.97	1120.02	1056.91	952.551
405.5	8.58789	97.1709	184.363	325.519	560.341	887.211	1148.28	1212.36	1119.21	1056.38	951.813
406.5	8.70996	97.2578	184.312	325.377	559.982	886.872	1147.81	1211.76	1118.76	1055.68	951.25
407.5	8.54102	97.0586	184.256	325.295	559.78	886.562	1147.2	1211.4	1118.15	1055.1	950.604
408.5	8.52246	97.1387	184.162	325.068	559.383	886.114	1146.75	1210.64	1117.6	1054.37	949.813
409.5	8.54297	97.0723	184.071	325.041	559.173	885.743	1146.27	1210.02	1117.12	1053.78	949.217
410.5	8.58203	97.2295	184.034	324.904	558.802	885.385	1145.58	1209.35	1116.41	1053.21	948.594
411.5	8.49707	97.2441	183.97	324.787	558.494	884.985	1145.17	1208.8	1115.87	1052.68	947.885
412.5	8.67383	97.5098	183.883	324.603	558.357	884.556	1144.74	1208.37	1115.31	1052.06	947.412
413.5	8.66699	97.6084	184.079	324.579	558.045	884.405	1144.14	1207.79	1114.72	1051.59	946.832
414.5	8.74219	97.5889	183.851	324.423	557.907	883.896	1143.55	1207.22	1114.16	1050.97	946.23
415.5	8.71094	97.5918	183.783	324.206	557.703	883.36	1143.03	1206.79	1113.59	1050.26	945.6
416.5	8.75488	97.6133	183.837	324.034	557.193	883.072	1142.44	1206.06	1112.81	1049.54	944.838
417.5	8.63379	97.5537	183.683	323.891	556.861	882.533	1141.95	1205.48	1112.31	1049.03	944.379
418.5	8.50488	97.4492	183.515	323.648	556.602	882.103	1141.34	1204.78	1111.6	1048.23	943.518
419.5	8.62598	97.5361	183.506	323.347	556.346	881.694	1140.95	1204.28	1111.05	1047.67	942.926
420.5	8.67285	97.583	183.46	323.291	556.173	881.508	1140.41	1203.74	1110.56	1047.14	942.328
421.5	8.6084	97.5898	183.243	323.146	555.856	881.032	1140.01	1203.27	1109.87	1046.63	941.768
422.5	9.13574	98.1904	183.561	323.172	555.814	880.704	1140.3	1202.97	1109.56	1045.89	941.264
423.5	9.62988	98.5957	183.96	323.521	555.991	880.863	1140.1	1203.01	1109.65	1046.12	941.361
424.5	9.6416	98.374	183.713	323.604	555.992	880.83	1139.56	1202.74	1109.31	1046.01	941.006
425.5	9.64453	98.3467	183.618	323.412	555.559	880.3	1138.91	1202.07	1108.52	1045.46	940.42
											122.02
											122.229

## Sheet: Fig4B SPR D605APB2 627-NPR416A 
Time(s)	7.81nM	15.63nM	31.25nM	62.5nM	125nM	250nM	500nM	1000nM	2000nM	4000nM	8000nM
2.5	1.73123	0.992004	0.570892	-0.0335693	0.337891	-0.101105	1.21689	-0.234558	-0.153625	0.360535	28.0856
3.5	-2.73907	-3.1326	-3.49121	-4.22537	-3.89102	-4.52609	-3.2124	-4.40918	-4.27548	-3.52853	23.4806
4.5	-4.04025	-4.13809	-4.88614	-5.70779	-4.69962	-5.80188	-4.57684	-5.83301	-6.12158	-4.64026	20.9099
5.5	-2.93008	-2.80878	-3.69864	-4.73398	-3.82147	-4.79562	-3.44989	-4.62518	-5.10361	-3.68869	21.218
6.5	-2.39923	-2.22443	-3.16309	-4.11484	-3.02655	-3.73273	-2.72412	-3.47519	-4.05713	-2.77774	21.8325
7.5	-2.55237	-2.4201	-3.6123	-4.0531	-3.241	-3.71436	-2.65381	-3.24548	-3.92978	-2.7215	17.0317
8.5	-2.77344	-2.28848	-3.46155	-4.26599	-3.60587	-3.83313	-2.61554	-3.21347	-3.94971	-2.99689	10.9352
9.5	-2.80078	-2.24121	-3.39905	-3.7789	-3.38907	-3.93936	-2.67218	-3.43494	-4.14151	-3.2301	8.43994
10.5	-2.95197	-2.21582	-3.07718	-3.61209	-3.05194	-3.75891	-2.88077	-3.80371	-4.58798	-2.90549	5.69891
11.5	-2.6301	-2.46622	-3.13614	-3.60037	-2.98007	-3.59641	-2.6792	-3.62598	-4.66104	-3.21838	3.3544
12.5	-2.96524	-2.94705	-3.61856	-4.19568	-3.62775	-3.89951	-3.04208	-4.21228	-4.93915	-4.62149	1.2583
13.5	-3.8125	-3.17792	-3.71896	-4.45544	-3.62384	-3.67139	-3.54483	-4.23145	-4.78525	-5.16721	-0.60968
14.5	-4.52344	-3.58612	-3.8877	-4.58044	-4.27423	-4.05069	-3.75146	-4.30096	-4.67667	-5.2164	-1.89053
15.5	-4.26682	-3.88925	-4.14865	-4.61209	-4.52618	-4.35382	-3.81903	-4.67322	-4.93369	-5.01642	-2.42334
16.5	-3.86057	-3.69824	-4.27756	-4.68396	-4.34885	-4.55188	-3.94366	-4.85019	-4.95126	-4.79807	-3.11124
17.5	-4.01367	-3.79666	-4.64319	-4.68631	-4.49609	-4.92648	-4.02881	-5.02167	-5.22589	-4.92267	-3.81747
18.5	-3.86874	-3.69901	-4.53653	-4.53241	-4.21368	-5.33936	-3.92529	-4.93143	-5.29425	-4.89532	-4.18781
19.5	-3.89142	-4.18146	-4.23068	-4.73398	-4.64569	-5.33545	-4.04913	-4.75409	-5.15283	-5.2551	-4.81396
20.5	-3.76016	-4.133	-3.84241	-4.84451	-4.67889	-5.04132	-3.85654	-4.79626	-5.09113	-5.30157	-5.00226
21.5	-3.49493	-3.96231	-3.32678	-4.71951	-4.33554	-4.90771	-3.80536	-4.733	-4.80869	-4.84961	-4.70264
22.5	-3.11603	-3.69119	-3.39044	-4.83905	-4.1875	-4.30304	-3.62842	-4.48416	-4.36533	-4.41095	-4.5585
23.5	-2.52032	-3.65021	-3.25607	-4.38007	-4.15936	-4.08118	-3.69757	-4.60214	-4.27158	-4.125	-4.18936
24.5	-2.2211	-3.07245	-2.56467	-3.60703	-3.78476	-3.93274	-3.21866	-3.9826	-3.79892	-3.59219	-3.33545
25.5	-2.25195	-2.6076	-2.51349	-3.73709	-3.491	-3.63235	-2.63702	-3.25684	-3.45712	-3.48477	-3.05811
26.5	-2.6586	-2.44159	-2.00684	-3.62967	-3.17969	-3.40616	-2.52725	-2.85059	-3.45126	-3.58398	-2.90381
27.5	-3.47385	-2.3877	-2.08691	-3.69022	-3.13596	-3.27335	-2.3378	-2.81543	-3.34579	-3.54416	-3.19287
28.5	-4.05038	-2.62637	-2.81427	-4.16562	-3.625	-3.54211	-2.94052	-3.72675	-3.60556	-3.78439	-3.99286
29.5	-4.32968	-3.0748	-3.42285	-4.64804	-4.40118	-3.63547	-3.55304	-4.24823	-4.38095	-4.39767	-4.89835
30.5	-4.33438	-2.91464	-3.55957	-4.53162	-4.16171	-3.8421	-3.46161	-4.00525	-4.64737	-4.76602	-4.83621
31.5	-4.0918	-2.71738	-3.86584	-4.491	-4.29492	-3.91672	-3.66202	-3.96072	-4.41846	-4.78204	-4.94287
32.5	-4.40976	-2.82245	-4.02911	-4.6152	-4.41055	-3.86789	-3.81436	-4.23886	-4.49307	-5.05472	-5.49286
33.5	-4.21054	-3.08963	-4.06857	-4.02264	-4.12695	-4.12256	-3.9007	-4.08923	-4.47705	-4.90939	-6.13037
34.5	-4.25079	-3.42557	-3.867	-4.17224	-3.87616	-3.87842	-3.69952	-3.82715	-4.37393	-4.41876	-5.44171
35.5	-4.4379	-3.79004	-3.92209	-4.50467	-4.07928	-4.49054	-3.97141	-4.2955	-4.49658	-4.86563	-5.20343
36.5	-4.42267	-4.28925	-4.38223	-4.41992	-4.41562	-5.0835	-4.5495	-4.79785	-5.02472	-5.20627	-5.43781
37.5	-4.46054	-4.3873	-4.30722	-4.04492	-4.20001	-4.96164	-4.21555	-4.64587	-5.0415	-5.25626	-5.74521
38.5	-5.0715	-4.21271	-4.16193	-4.27109	-4.29843	-5.01672	-3.88348	-4.62714	-5.02509	-5.0715	-5.68661
39.5	-5.17813	-4.27167	-3.96506	-4.55429	-4.10703	-4.72336	-3.45108	-4.36307	-5.54266	-4.87149	-6.13583
40.5	-4.7164	-4.04044	-3.76154	-4.92969	-3.97345	-4.68936	-3.64755	-4.25839	-5.00555	-4.5387	-5.79794
41.5	-4.23672	-3.8244	-4.10843	-5.11835	-3.69846	-4.00735	-3.0827	-3.86346	-4.50165	-4.17618	-5.18506
42.5	-4.29688	-4.20096	-3.50803	-4.20349	-4.73514	-4.24326	-4.09091	-4.79434	-5.46924	-4.54492	-5.47372
43.5	-1.55899	-0.96463	-0.902161	-1.88553	-1.30624	-2.45889	-0.913177	-0.99823	-1.98135	-1.58633	-1.92804
44.5	-0.72226	-0.12674	0.0915833	-1.23047	-0.563293	-0.369049	-0.409271	-0.305634	-0.960266	-0.608612	-0.635071
45.5	-0.4328	-0.0689392	0.392761	-1.01093	-0.841797	0.283691	-0.577637	-0.296661	-0.352844	-0.431274	-0.569061
46.5	-0.204681	-0.0498047	0.222046	-0.508179	-0.490234	0.428986	-0.338562	-0.223236	-0.120789	0.192963	-0.537415
47.5	0.355865	0.271301	0.0896301	-0.134766	-0.0117188	0.679779	-0.125305	0.158813	0.411224	0.62616	0.0254822
48.5	0.40625	0.536133	0.222839	-0.255859	0.132019	0.88916	-0.529602	0.0552673	0.294434	0.555847	0.115723
49.5	0.1875	0.622467	0.433777	-0.042572	0.144531	0.685638	-0.466309	-0.0732422	0.287018	0.273041	0.358704
50.5	-0.28595	0.447083	0.208374	0.375793	-0.0820313	0.380951	-0.177643	0.00412	0.187408	0.146881	0.383301
51.5	-0.0441589	0.0376892	-0.110748	0.0804749	-0.123047	0.146576	-0.356537	-0.0193176	0.280365	0.163269	0.273132
52.5	-0.0531311	-0.387299	0.025177	-0.0320129	0.166809	0.0200195	-0.230774	-0.0458984	-0.01651	-0.130096	0.0391541
53.5	-0.117584	-0.0173645	0.155273	0.019165	0.103912	-0.181549	0.106354	-0.0951233	-0.195404	-0.201569	-0.20575
54.5	0.214844	0.367004	-0.0697327	-0.0675659	-0.147644	0.0149231	0.480957	0.16037	-0.0684509	0.168335	-0.106537
55.5	0.109741	0.470123	0.140808	-0.506622	-0.307434	0.111023	0.48526	0.158417	-0.0520325	0.177338	-0.174103
56.5	-0.125	0.37793	0.420502	-0.351929	-0.209747	-0.0588989	0.738373	0.22522	-0.100098	0.126556	0.0169067
57.5	-0.782043	-0.105255	0.204865	-1.07538	-0.568756	-0.599121	0.571198	0.104126	-0.465729	-0.308228	-0.282318
58.5	-0.618744	-0.217377	-0.0689697	-1.1488	-0.647644	-0.86203	0.312592	-0.0509644	-0.866882	-0.27774	-0.85849
59.5	0.0827942	-0.201752	-0.262329	-0.944916	-0.250397	-0.645996	0.718445	0.28537	-0.565735	-0.0621338	-0.965515
60.5	-0.296112	0.0990295	-0.570129	-0.00781	-0.466797	0.0141602	1.20831	0.346313	-0.707123	-0.201569	-1.11591
61.5	-0.494537	0.115051	-0.133026	-0.267578	-0.6586	0.147339	1.4747	0.409576	-0.51181	-0.277344	-0.934662
62.5	-0.299622	0.246674	-1.81973	-3.02304	-0.134766	0.668823	1.81689	0.604889	-0.0446167	0.564056	-0.486603
63.5	-8.91992	-8.61426	1.43652	1.78711	-8.99258	-6.03976	-8.19327	-8.34549	-9.20245	-5.55353	-7.63779
64.5	28.0094	25.7112	11.9803	4.87894	20.2567	15.6001	21.788	15.7198	11.3163	14.9098	13.0212
65.5	22.8621	19.0901	10.5303	2.41251	-8.5625	-13.4437	-15.3737	-23.2783	-28.5743	-28.875	2.22821
66.5	14.1637	14.3154	12.94	10.3363	7.99335	1.4118	8.62003	8.38693	10.121	13.4203	35.304
67.5	9.45779	11.383	11.5568	11.2219	13.7652	13.6485	17.9521	20.4854	25.164	29.2742	41.8438
68.5	6.60587	8.96307	9.06543	8.76367	12.1699	15.1024	17.2833	20.6526	25.9054	31.2887	42.0571
69.5	4.79803	7.07129	7.10565	6.74023	10.0273	13.1153	15.6153	19.0936	24.3526	30.0476	40.8114
70.5	3.49298	5.83652	5.86191	5.24142	8.68085	11.2497	14.2493	17.9213	23.1405	28.8211	39.6478
71.5	2.76172	4.74045	5.03104	4.41797	7.70313	9.92236	13.6532	17.1057	22.3409	27.968	38.8099
72.5	1.93204	3.98184	4.69159	3.9473	7.23203	9.34189	13.4032	16.9111	22.2956	27.6656	38.5462
73.5	1.35858	3.61816	4.30447	3.89026	6.82578	9.01025	13.2333	16.8748	22.5546	27.9332	38.4024
74.5	1.15976	3.26584	3.98456	3.86057	6.85977	8.81454	13.2548	17.1467	22.9288	28.3512	38.3665
75.5	0.862885	2.81152	3.97949	3.72656	6.94376	8.89383	13.5489	17.4178	23.2812	28.7949	38.4649
76.5	0.605072	2.54785	4.00879	3.51837	6.75977	8.97	13.6493	17.601	23.7995	28.9621	38.561
77.5	0.410156	2.30176	3.95407	3.56174	6.71484	8.95554	13.7009	18.0057	24.3265	29.2586	38.6524
78.5	0.21875	2.32129	3.63651	3.64963	6.48633	9.14539	13.8067	18.3822	24.4382	29.4574	38.7407
79.5	-0.09375	2.00217	3.24588	3.49063	6.52579	9.22937	13.9567	18.5771	24.7003	29.8141	38.9606
80.5	-0.381653	1.80762	3.22479	3.45627	6.64337	9.33093	14.2025	18.79	25.3315	30.0113	39.1403
81.5	-0.569153	1.62753	2.99158	3.41486	6.71365	9.4993	14.4888	19.119	25.3745	30.4019	39.3509
82.5	-0.600769	1.54709	2.63806	3.26642	6.6965	9.47586	14.7642	19.2076	25.8288	30.6676	39.1806
83.5	-0.614075	1.47012	2.60059	3.30392	6.52969	9.50595	14.9306	19.4834	26.1308	30.7215	39.3552
84.5	-0.834381	1.30917	2.46579	3.21759	6.43555	9.57938	15.1259	19.6748	26.2026	30.8687	39.4153
85.5	-0.928528	1.01035	2.18692	3.03946	6.59766	9.9075	15.1169	19.7256	26.6628	30.9492	39.236
86.5	-1.20938	1.05646	2.11697	3.11603	6.44962	9.82861	15.4106	20.0928	26.9136	31.1074	39.1114
87.5	-1.16757	0.916595	2.31192	3.11719	6.38556	9.93289	15.7181	20.3362	27.114	31.2547	39.1646
88.5	-1.16876	0.844727	2.19003	3.23087	6.62225	10.2079	16.2372	20.574	27.3452	31.6156	39.3329
89.5	-1.37384	0.961517	2.25604	3.03439	6.46524	10.2716	16.3892	20.9678	27.7112	31.923	39.2325
90.5	-1.40741	0.871674	2.31033	3.07657	6.66095	10.3634	16.5177	21.04	28.1429	31.9699	38.8141
91.5	-1.36017	1.03537	2.50644	3.03165	7.03125	10.5305	16.8251	21.4525	28.6034	31.9894	39.1888
92.5	-1.27695	1.09747	2.77478	3.18674	7.1199	10.8802	17.0204	22.0584	28.8855	32.0719	39.2388
93.5	-1.18204	1.27832	2.97791	3.46994	7.13242	11.1149	17.3845	22.4447	29.1581	32.3809	39.1942
94.5	-1.10196	1.50412	3.04901	3.39963	7.33203	11.2388	17.6017	22.7424	29.6358	32.8727	39.4727
95.5	-1.10117	1.62091	2.96423	3.5336	7.53009	11.3911	17.7227	23.1201	30.1464	33.1078	39.6559
96.5	-1.18048	1.64395	2.89511	3.45822	7.67499	11.638	17.7548	23.2522	30.1073	33.2082	39.6251
97.5	-1.42307	1.64395	2.7619	3.48947	7.76328	11.5657	17.8403	23.3295	30.4589	33.5008	39.6138
98.5	-1.20938	1.30176	2.74823	3.37814	7.75665	11.9005	17.9048	23.5569	30.4534	33.8933	39.6485
99.5	-1.48047	1.12637	2.67282	3.45627	7.64883	11.9177	18.1216	23.7084	30.5952	33.9172	39.581
100.5	-1.57462	0.922089	2.58768	3.36914	7.51797	12.0985	18.272	23.7646	30.6534	33.9258	39.5704
101.5	-1.60391	0.874023	2.25604	3.19846	7.58829	11.7595	18.304	24.051	30.6432	34.1883	39.3673
102.5	-1.77228	0.529877	1.94003	3.23792	7.57071	11.952	18.4673	24.1463	30.8956	34.3145	39.2724
103.5	-1.67502	0.424408	1.88184	3.14963	7.51718	11.6735	18.6337	24.0948	30.6913	34.0066	39.2247
104.5	-1.75351	0.311523	1.63144	3.15234	7.50314	11.8817	18.9243	24.2986	30.8433	33.8832	39.3684
105.5	-2.04492	0.235748	1.63495	2.99533	7.58359	12.1782	19.0989	24.2823	30.8026	33.9547	39.2567
106.5	-2.24179	0.31662	1.6955	3.00821	7.38202	12.1106	19.5942	24.5197	30.9761	34.1301	39.1974
107.5	-2.35507	0.363495	1.85956	3.04532	7.42303	11.9649	19.7013	24.8483	30.8808	34.1465	39.0567
108.5	-2.35901	0.393158	1.88846	2.82617	7.34766	11.9821	20.1736	24.7713	30.9042	33.857	38.9388
109.5	-2.30508	0.483398	2.01697	2.71408	7.32928	12.2653	20.0446	24.9651	31.012	33.9441	39.1595
110.5	-2.29181	0.368164	2.25018	2.9133	7.50116	12.2563	19.9977	25.1041	31.3913	33.9883	39.0419
111.5	-2.22577	0.441986	2.04315	3.15002	7.5668	12.5645	19.8646	25.4998	31.5831	34.0504	39.0439
112.5	-2.21719	0.852173	2.32831	3.35861	7.50507	12.7376	19.8556	25.5994	31.7327	34.2477	39.2052
113.5	-2.48752	0.881439	2.41931	3.5672	7.80975	12.9751	20.3333	26.0107	31.821	34.4187	39.2642
114.5	-2.21213	1.13419	2.46777	3.80157	8.09024	13.0688	20.731	26.2361	32.2386	34.5129	39.3263
115.5	-1.97617	1.28107	2.83807	3.51212	8.39529	13.4536	20.9552	26.5338	32.5628	34.7844	39.3423
116.5	-1.94064	1.15527	3.02673	3.58282	8.67654	13.4641	21.2235	26.6643	32.7167	34.9847	39.3661
117.5	-1.90314	1.11465	2.88885	3.81915	8.54688	13.493	21.3454	26.8455	32.9929	35.1527	39.1743
118.5	-1.79453	1.07755	2.72168	3.68829	8.8074	13.7809	21.4532	26.733	33.0042	35.4082	38.9927
119.5	-1.85666	0.960358	2.51971	3.66605	8.63828	13.8446	21.4517	26.9104	32.8893	35.4207	38.8372
120.5	-2.08362	0.808014	2.45642	3.65509	8.78946	14.0223	21.4114	26.9537	32.6792	35.4504	38.8474
121.5	-2.07776	0.654114	2.43066	3.52032	8.47656	13.8474	21.4286	26.792	32.7839	35.4644	38.9075
122.5	-2.23401	0.569336	2.45721	3.29767	8.51874	13.7005	21.6173	26.7623	32.6929	35.4844	38.7896
123.5	-2.23557	0.638489	2.19278	3.31564	8.42148	13.7938	21.4989	26.933	32.6026	35.3789	38.7809
124.5	-2.30588	0.624817	2.1377	3.29456	8.36404	13.7723	21.4661	26.96	32.3604	35.2699	38.622
125.5	-2.29611	0.691986	2.13144	3.23868	8.04999	13.5954	21.4587	27.1721	32.2054	35.1469	38.5103
126.5	-2.47266	0.580658	2.04471	3.32581	8.1297	13.7157	21.597	27.1842	32.303	35.3406	38.2884
127.5	-2.77188	0.52597	1.85059	3.33829	7.94492	13.6841	21.7989	27.2686	32.414	35.2418	38.2505
128.5	-2.95432	0.363495	1.91855	3.3129	7.96759	13.6903	21.6833	27.242	32.7835	35.282	38.2661
129.5	-2.86642	0.44278	1.85135	3.35355	8.08789	13.8083	21.9755	27.3342	32.739	35.0844	38.147
130.5	-2.78827	0.290833	1.92636	3.4957	8.20779	13.9602	21.9427	27.5268	32.9351	35.1125	37.9208
131.5	-2.65625	0.414276	1.68338	3.40079	8.08594	14.0169	21.9716	27.6885	33.2331	34.9457	37.7255
132.5	-2.58478	0.421692	1.96973	3.31915	8.22382	13.9763	22.0645	27.8104	33.3913	34.7636	37.8134
133.5	-2.21799	0.397064	1.86426	3.35236	8.37656	14.1763	22.1563	27.8537	33.7526	34.9269	37.5775
134.5	-2.11993	0.578705	2.07089	3.42032	8.7211	14.2071	22.3337	27.9287	33.8796	35.0957	37.2665
135.5	-2.38828	0.59082	2.24353	3.62384	8.94687	14.2192	22.5489	28.0131	33.7944	34.889	37.4271
136.5	-2.30859	0.735748	2.19434	3.85941	9.25	14.3559	22.5833	28.2803	33.8429	35.3695	37.6075
137.5	-2.44141	0.722076	2.18533	3.89923	9.41837	14.6942	22.8114	28.4139	33.9229	35.6082	37.5899
138.5	-2.18088	0.878326	2.15448	4.04025	9.3461	14.9282	22.9708	28.5092	33.8858	35.5965	37.3993
139.5	-2.29922	0.845123	2.02127	3.59531	9.35977	14.9091	22.8774	28.5736	33.8944	35.5543	37.3028
140.5	-2.30313	0.893555	2.10059	3.43985	9.58594	15.0641	22.8419	28.3994	33.6382	35.4043	37.2438
141.5	-2.42151	0.813873	2.1998	3.3125	9.58594	15.0028	22.836	28.5545	33.7393	35.6223	37.1493
142.5	-2.23987	0.613098	2.20682	3.33829	9.30118	14.8712	22.7806	28.5717	33.7104	35.7031	37.0775
143.5	-2.43515	0.530273	2.22363	3.21094	9.13437	14.8098	22.7501	28.5303	33.5507	35.5215	36.8634
144.5	-2.64182	0.602936	1.96387	3.16565	8.88165	14.4771	22.7263	28.3514	33.3976	35.2691	36.6333
145.5	-2.53986	0.488495	1.73651	3.37735	8.98361	14.452	22.7997	28.6057	33.3292	35.4742	36.529
146.5	-2.8707	0.386536	1.78494	3.37424	8.74258	14.7141	22.6923	28.5608	33.2773	35.318	36.5575
147.5	-2.93399	0.247467	1.80762	3.39453	8.51837	14.2817	22.7677	28.4174	33.1894	35.2144	36.515
148.5	-2.77499	0.0603638	1.53259	3.35587	8.47461	14.2704	22.8271	28.224	33.1378	35.1297	36.3454
149.5	-2.76096	-0.0802612	1.47949	3.60861	8.4332	14.3544	22.6993	28.0643	32.8995	35.0855	36.2325
150.5	-2.77423	-0.233398	1.58182	3.44025	8.24179	14.3973	22.6446	28.4127	33.0015	34.9195	36.0599
151.5	-2.91992	0.013092	1.38104	3.53479	8.19376	14.286	22.6091	28.3912	33.2831	35.1344	36.0345
152.5	-2.91876	0.0693359	1.40369	3.27969	8.28241	14.1333	22.8571	28.4592	33.446	35.0008	36.0177
153.5	-2.91446	0.367401	1.34705	3.04651	8.32187	14.393	22.8681	28.3666	33.2761	34.877	35.9833
154.5	-2.83203	0.430664	1.52637	2.93088	8.42148	14.4657	23.1704	28.6764	33.248	35.1039	35.6989
155.5	-2.6301	0.454498	1.69705	3.09299	8.66016	14.8204	23.3931	29.0979	33.5015	35.1687	35.7743
156.5	-2.33829	0.730286	1.76697	3.11057	8.97891	14.8517	23.5837	29.2584	33.4604	35.1386	35.7263
157.5	-2.31485	0.898651	2.07907	3.31836	9.28946	14.9067	23.5747	29.6912	33.8702	35.3082	35.6165
158.5	-2.26718	1.19864	2.09277	3.39609	9.26837	15.0485	23.6177	29.599	33.7886	35.4777	35.6571
159.5	-2.18008	0.99707	2.11618	3.57306	9.26602	15.0848	23.8997	29.6717	33.7901	35.4988	35.6345
160.5	-2.05429	0.979492	2.37909	3.78519	9.34491	15.368	23.9099	29.6811	33.7894	35.3332	35.6513
161.5	-2.27969	0.853729	2.33142	3.84103	9.38007	15.3157	23.9681	29.6936	33.5382	35.3445	35.7068
162.5	-2.31406	0.772858	2.2244	3.8754	9.46173	15.288	23.8411	29.6065	33.6476	35.3531	35.7501
163.5	-2.25079	0.74826	2.26465	3.90939	9.39883	15.4513	23.8368	29.5908	33.6729	35.2562	35.7001
164.5	-2.35587	0.747467	2.06503	3.90781	9.26367	15.4489	23.9427	29.5682	33.7065	35.5136	35.3411
165.5	-2.31406	0.719727	1.80096	3.8551	9.20703	15.3536	23.7318	29.1834	33.5233	36.2719	35.4177
166.5	-2.58243	0.422089	1.86972	3.65625	9.0715	15.3138	23.6579	29.2131	33.485	37.0367	35.3794
167.5	-2.43048	0.395508	1.62283	3.75235	8.9953	15.268	23.5775	28.9424	33.1026	37.2383	35.413
168.5	-2.56952	0.193176	1.65292	3.61057	8.88907	15.1571	23.5349	29.026	33.0558	38.0219	35.6068
169.5	-2.61252	0.0291138	1.39706	3.70508	8.84335	15.1231	23.4114	28.8744	33.1655	38.2234	35.6774
170.5	-2.71915	-0.00955	1.22791	3.58282	8.69687	15.0048	23.4407	28.8092	33.0171	38.2777	35.5091
171.5	-2.59491	0.140839	1.12204	3.40118	8.7785	14.9567	23.5864	28.8908	32.9569	38.7371	35.627
172.5	-2.79532	0.229889	1.29395	3.65509	8.83633	14.8782	23.4731	29.0096	33.1405	38.9308	35.5958
173.5	-2.83673	0.398651	1.34549	3.39807	8.74179	14.8665	23.5661	28.9736	33.1686	38.8793	35.3825
174.5	-2.70938	0.450195	1.36972	3.55118	8.88907	14.8719	23.4727	28.976	33.221	39.0402	35.2603
175.5	-2.8121	0.381042	1.53183	3.44922	9.14218	14.9458	23.6118	29.0307	33.3058	39.334	35.2013
176.5	-2.77774	0.345123	1.45877	3.64258	9.23163	15.1466	23.6646	29.3096	33.623	39.5617	35.2329
177.5	-2.66171	0.563477	1.58612	3.64377	9.23788	15.4235	23.8267	29.5862	33.6847	39.6676	35.3118
178.5	-2.28555	0.792786	1.90253	3.80157	9.35312	15.5028	23.9853	29.9686	33.8792	39.9676	35.5321
179.5	-2.46484	0.819336	2.50174	4.02734	9.26563	15.4759	23.947	29.9424	33.8753	40.2406	35.3712
180.5	-2.04453	0.800598	2.29395	3.85355	9.20743	15.8395	24.0044	30.0018	34.121	34.7137	35.6333
181.5	-2.04727	0.699036	2.32791	4.04883	9.33945	15.9278	24.2524	29.9143	34.0175	33.0754	35.329
182.5	-2.14063	0.791595	2.13846	3.93127	9.45392	16.1079	24.2071	30.0463	33.9784	31.2734	35.3919
183.5	-2.10703	0.718567	1.94901	3.98752	9.2789	15.863	24.0317	29.7799	34.0522	30.5305	35.3048
184.5	-2.08127	0.618958	1.62909	3.85941	9.23126	15.6208	24.0321	29.6842	34.1768	31.9063	35.2052
185.5	-2.17188	0.521301	1.65878	3.68634	9.25076	15.3833	23.7556	29.8682	34.0937	33.1746	35.1974
186.5	-2.07813	0.657227	1.35135	3.76602	9.10822	15.2552	23.6454	29.8162	33.8007	33.4644	34.9915
187.5	-2.28711	0.335358	1.13846	3.46213	9.03671	15.0841	23.7872	29.5447	34.1483	35.3113	35.0833
188.5	-2.65509	0.355286	0.839233	3.59531	9.11053	15.1622	23.8411	29.4639	33.9745	38.9359	34.7696
189.5	-2.5719	-0.033783	1.06152	3.38049	9.24805	15.0142	23.9278	29.4033	33.7097	40.489	34.4372
190.5	-2.72852	-0.0423584	1.27518	3.30548	9.01874	14.8434	23.9114	29.4971	33.5648	40.4597	34.2286
191.5	-2.77579	-0.147461	1.37909	3.23282	9.1535	14.7017	23.8587	29.4545	33.3917	40.2148	34.1618
192.5	-2.73752	-0.289642	1.04941	3.29065	8.94962	14.636	23.6103	29.274	33.3335	40.1266	34.1517
193.5	-2.84531	-0.287292	1.23376	3.18945	8.8418	14.5712	23.5899	29.1443	33.146	40.1262	33.922
194.5	-3.01682	-0.250977	1.40097	3.16174	8.79181	14.4321	23.3833	29.1068	33.0499	40.3504	34.0575
195.5	-2.73087	-0.139252	1.47403	3.19611	8.95703	14.4591	23.4458	29.4346	33.2448	40.2082	34.1618
196.5	-2.60352	-0.0615234	1.58066	3.44455	9.02109	14.7805	23.5653	29.6045	33.544	40.3965	34.1208
197.5	-2.41757	0.218567	1.72205	3.45432	9.1922	14.8169	23.6368	29.6307	33.496	40.789	34.2095
198.5	-2.31485	0.367401	1.75644	3.82776	9.34335	15.0223	23.9407	29.8303	33.6702	40.934	34.411
199.5	-2.2457	0.694733	1.72519	3.90469	9.65079	15.1274	24.0466	29.9815	33.8515	41.0164	34.5818
200.5	-2.23788	0.762299	1.74472	3.82617	9.63593	15.3622	24.3024	30.2768	33.9351	41.0523	34.7169
201.5	-2.10156	0.698242	1.73691	3.95743	9.54257	15.4224	24.2852	30.0783	33.9706	41.132	34.5724
202.5	-2.02853	0.846283	1.8533	3.84924	9.76758	15.6844	24.5196	29.9276	34.1058	41.332	34.4946
203.5	-1.99609	0.679108	1.78067	3.92267	9.68124	15.7169	24.8161	29.8057	34.1104	41.3473	34.5755
204.5	-2.0715	0.692383	1.52478	3.90118	9.56836	15.6513	24.7978	29.7342	33.6917	41.5269	34.2978
205.5	-1.99765	0.608398	1.42676	3.91641	9.44766	15.5477	24.604	29.6119	33.6749	41.3836	34.2755
206.5	-2.14337	0.745117	1.46307	3.625	9.34726	15.386	24.445	29.392	33.4171	41.1359	34.1165
207.5	-2.39883	0.808014	1.34903	3.56604	9.16095	15.047	24.2372	29.4154	33.3827	41.0183	33.9892
208.5	-2.4328	0.634583	1.25916	3.29297	8.83945	15.1989	23.9962	29.3846	33.1905	41.2679	33.8603
209.5	-2.44962	0.666595	1.4205	3.23441	8.78711	15.061	24.0505	29.3369	33.2843	41.1121	33.7583
210.5	-2.64963	0.511139	1.2916	3.40588	8.64493	14.77	23.9271	29.269	33.2643	40.8992	33.4857
211.5	-2.98087	0.478333	1.0697	3.20938	8.65115	14.4559	23.8466	29.5334	33.2597	40.7852	33.3302
212.5	-10.4266	-6.93457	-8.7428	-7.44296	0.646881	14.2563	17.3458	21.276	25.4546	36.664	32.9165
213.5	13.0476	15.9193	25.1549	30.4313	24.8004	1.504	33.6622	44.8615	47.3722	42.2582	24.2231
214.5	17.8617	25.9842	27.6381	32.6688	46.9027	56.4981	67.2579	72.9619	76.7026	82.7101	59.6829
215.5	8.69687	12.3752	10.5143	13.1922	20.2785	45.0165	36.6446	36.2697	37.9171	48.6035	29.8267
216.5	3.27969	5.96307	4.8826	6.89767	12.575	23.588	27.2118	29.0104	31.3343	39.0871	25.6946
217.5	1.76212	4.22794	3.72754	5.3219	10.4121	17.2149	23.688	26.7166	29.1323	34.7957	22.795
218.5	0.929291	3.57129	3.68066	4.87109	9.94882	16.1005	23.1509	26.4846	29.5898	34.8898	22.7739
219.5	-0.205078	2.27911	2.88535	4.1543	9.46835	15.3356	22.5868	26.2338	29.2257	34.7933	22.8177
220.5	-0.278534	2.00684	2.84979	4.1586	9.61444	15.0438	22.5298	26.3588	29.4518	35.2699	22.5372
221.5	0.578491	2.44785	3.4744	4.91211	10.1926	15.1325	22.7622	27.2002	30.6351	35.7933	22.7005
222.5	-2.40781	-0.389648	0.210327	1.76447	8.00821	14.1895	20.3786	25.2955	27.61	33.943	21.0189
223.5	-3.60196	-0.978302	-0.999817	1.07852	6.15625	11.3981	18.1306	23.2881	26.0518	32.0059	18.5728
224.5	-3.94415	-0.885345	-1.3049	1.01331	5.75076	10.6938	17.856	22.7936	25.2882	31.2559	17.6005
225.5	-3.90155	-1.19238	-1.06583	1.04807	5.92383	10.6735	18.2126	22.9545	25.2018	31.175	17.9036
226.5	-4.42969	-1.49158	-1.36972	0.876953	5.82111	10.4301	18.2685	22.5674	24.9296	30.6527	17.6021
227.5	-4.1246	-2.09549	-1.72757	0.510162	5.35938	10.2938	18.1306	22.3408	24.4745	30.3254	17.295
228.5	-4.33517	-1.84158	-1.73145	0.887115	4.83673	10.4286	18.1231	22.0502	24.1593	30.4437	17.0134
229.5	-3.88986	-1.56387	-1.73886	1.31644	5.09491	10.6614	18.0493	21.9162	24.0694	30.6433	17.0427
230.5	-4.15469	-1.18457	-1.48654	0.911346	5.11874	10.5594	18.0814	21.9326	24.369	30.2816	16.9942
231.5	-4.03595	-0.981445	-0.968964	0.973846	5.23517	10.3692	18.2962	22.2686	24.3655	30.3184	16.6118
232.5	-4.2832	-1.54434	-0.912323	0.810547	5.39258	10.4282	18.2419	22.335	24.4651	30.5594	17.1724
233.5	-3.84299	-1.50528	-1.17093	0.65274	5.49805	10.5298	18.1825	22.0502	24.4062	30.2281	17.4548
234.5	-3.64377	-1.29901	-1.19122	0.278931	5.14529	10.2989	18.0595	21.9795	24.2616	29.943	16.6224
235.5	-3.76602	-0.883392	-0.893188	0.488281	5.11719	10.6649	18.1064	21.9686	24.3112	29.8473	16.6602
236.5	-4.22226	-1.25409	-1.28772	0.366425	4.88907	10.604	17.4759	21.5471	23.9815	29.5406	16.5095
237.5	-2.48242	0.897858	0.748627	2.67191	6.8078	11.1337	20.0571	23.7115	27.0042	31.8211	17.9091
238.5	-3.09375	0.00528	0.805664	2.49609	6.79337	12.0505	19.4372	22.8365	25.9679	31.2019	17.7329
239.5	-3.51447	-1.04199	-2.10803	-1.22186	6.62384	11.7309	19.0845	22.6198	25.4538	31.1461	16.7728
240.5	-15.9957	-12.6877	-3.13382	1.90234	-4.98282	2.81415	6.56845	9.06738	13.2491	14.9508	9.0083
241.5	50.4195	63.2518	59.2764	61.7824	43.7355	37.3001	62.6134	69.1264	68.2315	87.7457	38.4552
242.5	43.7031	39.5268	33.7396	30.8887	56.2887	62.5005	64.1435	66.01	69.61	72.2656	67.1497
243.5	15.7383	14.1139	11.4447	10.0223	28.6945	35.5349	37.8802	41.3928	44.0835	46.1906	40.2157
244.5	3.07617	4.63693	3.51114	4.07422	13.4121	19.0841	24.695	28.9955	31.1898	35.4652	23.777
245.5	-0.951172	1.02481	1.12204	1.82071	8.78867	13.9301	20.3821	23.669	26.5464	32.1328	18.7442
246.5	-2.39883	-0.008	-0.0709229	1.45117	7.40234	12.0852	18.9525	21.5627	25.4378	31.0316	17.6005
247.5	-3.00977	-0.182617	-0.758423	1.07697	6.43671	11.0118	18.3657	20.9615	24.5495	30.3152	16.8716
248.5	-3.05237	-0.65567	-1.28967	0.400787	5.41876	10.5657	17.6384	20.64	23.819	29.3418	16.4911
249.5	-3.33905	-0.164642	-0.674438	1.20471	5.14609	10.5208	17.1181	20.1131	23.7206	29.4847	15.8548
250.5	-2.10626	0.309967	-0.641235	1.21094	6.6199	11.3372	18.0778	21.3373	24.8089	30.4812	16.7591
251.5	-3.70117	-1.03925	-1.65372	-0.269897	4.6922	10.3247	17.2919	19.8674	23.36	29.252	15.2306
252.5	-4.59491	-1.6377	-2.13654	-0.342957	4.00626	9.345	16.1392	18.9323	22.3558	28.2758	14.2247
253.5	-4.31485	-1.9783	-2.26428	-0.634766	3.90234	9.28134	15.761	18.778	22.13	28.05	14.2689
254.5	-4.14963	-2.34863	-2.59122	-0.601929	3.74609	9.38446	15.9189	18.6303	21.9058	27.7215	13.9599
255.5	-4.37656	-2.46503	-2.20801	-0.411713	3.81445	9.60242	15.8138	18.6248	21.9026	27.7265	13.8427
256.5	-4.19922	-2.19043	-1.76895	0.136353	4.09491	9.48993	15.8685	18.4948	22.0901	27.8965	13.8911
257.5	-3.85901	-2.09824	-1.82599	0.37384	4.55624	10.0712	16.3681	18.701	22.0866	27.8289	14.2728
258.5	-3.80704	-1.85916	-1.90295	0.198456	4.659	9.93839	16.3962	18.4545	22.1511	27.8648	13.9845
259.5	-4.05624	-1.66699	-1.53967	0.447662	4.54883	9.73172	16.6079	18.6838	22.3112	27.5316	14.0704
260.5	-4.17697	-1.81503	-1.42676	0.862122	4.66602	9.50946	16.1595	19.044	22.2749	27.4359	14.1591
261.5	-4.16916	-1.93808	-1.81467	0.332825	4.42383	9.41806	15.5169	18.7904	21.9823	27.357	13.8755
262.5	-4.42188	-1.76855	-2.57678	-0.149597	3.93826	8.9126	15.5067	18.4111	22.1925	27.4488	13.7704
263.5	-4.82382	-1.76309	-2.69788	-0.0648193	3.95779	8.77353	15.5439	18.1475	21.8893	27.4187	13.8134
264.5	-5.06525	-1.83496	-2.93262	-0.216797	4.01797	9.08017	15.6454	17.9381	21.2659	27.1695	13.4704
265.5	-4.97971	-1.73105	-2.81387	-0.725372	4.11758	9.04617	15.7415	17.7854	21.2315	27.2726	12.9981
266.5	-4.64923	-1.79666	-2.78262	-0.578094	4.41876	9.36102	15.4548	17.8666	21.1796	27.0621	12.9364
267.5	-4.97461	-1.81503	-2.8963	-0.390228	4.2457	8.77313	15.0524	18.108	21.1315	26.9437	12.8255
268.5	-4.97305	-1.78027	-3.23535	-0.808197	4.10742	8.29578	14.5974	17.8444	20.9503	27.0394	12.7505
269.5	-4.97577	-1.89041	-3.5791	-0.978912	3.80118	8.00555	14.6216	17.5178	20.712	26.4926	12.4306
270.5	-5.07541	-2.11426	-3.62207	-1.06912	3.60312	8.02118	14.8583	17.4424	20.3042	25.9265	12.0196
271.5	-5.02423	-2.10684	-3.35684	-0.99646	3.26678	7.99344	14.7763	17.3819	19.7628	25.484	12.0118
272.5	-4.88907	-2.50528	-3.31232	-1.32538	3.52969	7.92392	14.6403	17.4948	19.7018	25.5871	11.7028
273.5	-4.81015	-2.62558	-3.15607	-1.07968	3.46445	8.12509	14.3759	17.2807	20.0687	25.882	11.7095
274.5	-4.52499	-2.87128	-2.85373	-1.42459	3.01602	8.01257	14.2403	17.0635	20.2682	26.1539	11.87
275.5	-4.25314	-2.78964	-2.40295	-1.27185	3.17267	7.98563	14.5306	16.8252	20.2983	26.0406	11.8599
276.5	-4.0629	-2.47089	-2.41544	-1.2402	3.03711	7.63562	14.7274	16.9178	19.9952	25.8762	11.613
277.5	-4.18555	-2.72794	-2.10059	-1.17184	3.30469	8.12079	14.9024	17.1436	19.7565	25.7086	11.8747
278.5	-4.52188	-2.80838	-1.82794	-1.35077	3.27264	8.16376	14.8314	17.2393	20.2507	25.7953	11.5837
279.5	-4.50079	-2.80136	-1.98886	-1.22498	3.14844	8.43015	14.9095	17.5076	20.2608	26.0684	11.404
280.5	-4.54141	-2.85565	-2.06622	-1.28357	3.091	8.53799	14.929	17.2858	20.6237	26.2	11.5786
281.5	-4.60782	-2.43533	-2.39044	-0.848053	3.22968	8.36337	14.7642	17.1404	20.8554	26.5152	11.8978
282.5	-5.1875	-2.84473	-2.70761	-0.948029	3.40546	8.51688	14.7732	17.2389	20.6245	26.366	11.6505
283.5	-5.2832	-2.74512	-2.60724	-0.881622	3.24725	7.92078	14.5653	17.2869	20.4229	25.9426	11.3388
284.5	-5.43985	-2.69669	-2.79199	-0.789429	3.40509	7.58914	14.1845	16.7623	20.2241	25.7629	11.0974
285.5	-5.32813	-3.42792	-3.08731	-0.974213	2.88751	7.52899	14.1153	16.3698	20.1573	25.416	11.0806
286.5	-5.05469	-3.61035	-2.91858	-1.17615	3.05508	7.74814	14.2091	16.533	20.1983	25.7621	10.7372
287.5	-4.71289	-3.58145	-3.20569	-1.15662	3.25351	7.62665	13.8509	16.6291	20.5663	25.8465	10.9911
288.5	-5.14883	-3.44394	-3.45529	-0.941406	3.00351	7.61298	13.7798	16.2584	20.5167	25.6031	10.8782
289.5	-5.59845	-3.65137	-3.74631	-1.13007	2.56952	7.17743	13.4517	16.1467	19.8851	25.6305	10.6064
290.5	-5.73361	-4.06424	-3.80685	-1.07187	2.41055	6.94385	13.363	15.7721	19.7546	25.1191	10.3138
291.5	-5.65509	-4.5166	-3.90683	-1.37381	2.72891	7.1329	13.1161	15.6686	19.1683	24.8555	10.1306
292.5	-5.98203	-4.50214	-3.89905	-1.73047	3.04611	6.88953	13.0321	15.5639	19.1089	24.8211	10.1313
293.5	-5.56992	-4.28534	-3.77246	-1.78983	2.65701	7.17078	13.3564	15.5627	19.4109	24.9875	10.2235
294.5	-5.53439	-4.20566	-3.97443	-1.77969	2.64218	7.57391	13.522	15.7737	19.1155	24.7488	10.2997
295.5	-6.04257	-3.95566	-3.99707	-1.88281	2.32928	7.37549	13.3208	15.7471	18.9374	24.2762	9.7009
296.5	-6.07776	-4.25488	-3.9549	-2.08514	2.19101	7.38367	12.9544	15.6904	18.6526	23.7754	9.7243
297.5	-5.59024	-4.37558	-4.00998	-2.00037	2.36172	7.50009	13.1817	15.308	18.7292	23.8558	9.40869
298.5	-5.5051	-4.0123	-4.11035	-2.05936	2.58673	7.27588	13.4489	15.3971	18.8804	24.3058	9.34579
299.5	-5.39767	-3.77597	-3.83261	-1.70233	2.36053	7.74619	13.5189	15.7361	19.0851	24.6703	9.86768
300.5	-5.45041	-3.53067	-3.46545	-1.6777	2.22617	8.33054	13.5716	15.9748	19.353	24.868	9.84659
301.5	-5.11719	-3.62833	-3.6752	-1.58981	2.25235	8.51962	13.5798	15.6354	19.2999	24.8656	9.56689
302.5	-5.13907	-3.42636	-3.53537	-1.81873	2.6539	7.89734	13.6095	15.6873	19.5038	24.7105	9.62744
303.5	-5.26602	-3.80176	-3.39319	-2.09607	2.89844	7.70438	13.3208	15.494	19.4991	24.6863	9.68604
304.5	-5.2496	-4.14081	-3.37207	-2.16602	2.86874	7.52002	13.2689	15.3096	19.1976	24.4996	9.57196
305.5	-5.70703	-3.95682	-3.50488	-1.94101	2.57578	7.28214	13.3419	15.3963	18.9085	24.6648	9.73215
306.5	-5.74765	-3.93338	-3.92715	-1.93085	2.10977	7.03836	13.3271	15.6588	18.8194	24.5148	9.59735
307.5	-5.54843	-4.14316	-4.11545	-2.1449	1.96173	6.6622	13.1095	15.4162	18.9147	24.3102	9.17197
308.5	-5.45782	-4.27322	-3.86154	-2.43164	2.21951	6.7114	12.6407	15.4217	18.3237	24.4016	9.02939
309.5	-5.78165	-4.25995	-3.7666	-2.59375	2.36603	6.6618	12.4348	15.3201	17.9667	24.2969	9.0376
310.5	-5.80273	-4.48184	-3.9584	-2.37967	2.07462	6.48837	12.3239	15.1002	18.098	24.3176	9.20596
311.5	-5.50586	-4.5455	-4.09396	-1.9664	1.52539	6.2829	12.7399	15.1287	18.0675	24.209	9.36493
312.5	-5.26132	-4.32986	-4.6131	-2.23434	1.26563	6.51102	12.8431	14.8549	17.7343	24.0375	9.12469
313.5	-5.24844	-4.56268	-4.81076	-2.40625	1.59805	6.58838	12.4126	15.2151	17.6886	24.25	8.88016
314.5	-5.74142	-4.59473	-4.43262	-2.3027	1.67813	6.51727	12.6942	15.2928	17.9011	24.0598	8.56534
315.5	-5.68555	-4.27832	-3.97327	-1.88397	1.80118	6.55283	12.5673	15.2479	18.0241	23.7773	8.61066
316.5	-5.4469	-4.27441	-3.79825	-1.95273	1.68439	6.65945	12.3607	14.9154	18.2272	23.9117	8.39346
317.5	-5.30899	-4.54044	-4.27011	-2.20703	1.59726	6.51453	12.4544	14.7061	18.1401	23.6668	8.42822
318.5	-5.40469	-4.29276	-4.92795	-2.31561	1.30389	6.46884	12.7864	14.4857	18.0925	23.6316	8.59189
319.5	-5.34885	-4.20721	-4.56232	-2.37381	1.30585	6.89697	12.5845	14.5963	18.2191	23.6508	8.43408
320.5	-5.71915	-4.10565	-3.94864	-2.06717	1.81525	6.92548	12.9251	14.6998	18.3995	23.7922	8.54776
321.5	-5.49219	-3.65994	-3.90921	-2.10156	1.92343	6.74149	13.0591	14.5365	18.3628	24.1133	8.36142
322.5	-5.14804	-3.37167	-3.33926	-1.86404	2.24374	6.88953	13.3927	14.6373	18.3804	23.5625	8.71689
323.5	-4.9953	-3.55762	-3.36349	-1.71054	2.45078	7.30164	13.522	14.9655	18.4202	23.5598	8.83878
324.5	-5.02774	-3.53494	-4.10138	-1.91873	2.00275	6.95047	13.4993	15.1725	18.2237	23.468	9.3212
325.5	-5.18088	-3.74277	-3.82559	-1.95389	1.70078	6.83679	13.1852	14.6565	18.0202	23.3551	9.00323
326.5	-5.55002	-4.0123	-3.73184	-1.96521	1.66602	7.07547	13.1208	14.3271	18.1183	23.4984	8.62158
327.5	-5.72385	-4.36621	-3.78458	-2.36404	1.6207	6.24539	12.7618	14.3354	17.9846	23.1828	8.45401
328.5	-5.63672	-4.65918	-4.03381	-2.45468	1.83203	6.10205	12.3044	14.0143	17.5772	23.4074	8.04465
329.5	-5.47031	-4.52948	-3.86584	-2.49374	1.74298	6.46179	12.3731	14.1373	17.4858	23.4355	7.49698
330.5	-5.92969	-4.17401	-4.2709	-2.58826	1.36328	6.55164	12.7184	13.9108	17.4245	23.4676	7.36807
331.5	-6.03165	-4.28848	-4.79785	-2.73788	1.32928	6.18604	12.3126	13.9143	17.1362	23.382	7.69696
332.5	-5.91602	-4.30917	-4.71973	-2.48633	1.37576	5.90164	11.6856	13.7479	17.1151	23.243	8.04541
333.5	-5.80078	-4.40448	-4.55411	-2.4613	1.42148	5.98602	11.5462	13.6959	17.237	23.1898	7.43799
334.5	-6.05078	-4.59357	-4.96155	-2.51559	1.63165	5.66571	11.7177	13.6072	17.1234	23.1699	7.00165
335.5	-5.94571	-4.34357	-4.57404	-2.66092	1.74103	5.82938	11.6396	13.7596	16.9105	22.9914	7.00754
336.5	-5.87228	-4.28067	-4.56622	-2.56601	1.71054	6.07938	11.5661	13.7635	16.8558	22.9258	6.72119
337.5	-5.91135	-4.21658	-5.06308	-2.8035	0.941803	6.26492	11.5771	13.8229	16.8058	22.6422	6.83954
338.5	-5.85196	-4.758	-5.07639	-2.71289	0.836334	6.10828	11.7325	14.0139	16.712	22.7176	7.1868
339.5	-5.88632	-4.4494	-4.70099	-2.72107	0.616028	6.00089	11.7064	14.085	16.848	22.6148	7.29385
340.5	-5.59219	-4.61035	-4.47949	-2.64569	0.744141	6.14188	11.7427	14.1287	16.7546	22.639	7.42236
341.5	-5.36017	-4.83847	-4.02441	-2.87537	1.04999	6.48251	12.1528	14.2393	16.8366	22.759	7.75089
342.5	-5.50079	-4.72598	-3.87012	-2.85312	0.869537	6.58838	12.3474	14.2752	16.9343	23.1086	7.88016
343.5	-5.4418	-4.63144	-3.72131	-2.61679	0.75	6.90714	12.6923	14.0365	17.1882	23.0476	7.99463
344.5	-5.44376	-4.22559	-3.3674	-2.47617	0.819519	6.80515	12.3575	14.5354	17.0745	22.9652	8.14502
345.5	-5.48672	-4.41153	-4.01233	-2.52109	1.51328	6.51883	12.0505	14.4565	17.1921	22.6871	8.49268
346.5	-5.48672	-4.59589	-4.11584	-2.03476	1.58398	6.54501	12.1462	13.8744	17.3538	22.8484	8.38486
347.5	-5.80978	-4.89471	-4.33459	-2.37225	1.56757	6.20868	11.9864	13.5799	17.5171	23.0484	8.08563
348.5	-6.05078	-4.91736	-4.60138	-2.84961	1.29062	5.97314	11.8669	13.4541	17.1835	22.8191	7.71689
349.5	-5.9668	-4.68182	-4.98459	-2.94257	0.943359	5.92197	11.9474	13.3475	16.7159	22.525	7.5368
350.5	-6.01602	-4.49158	-5.41272	-2.74414	0.87851	6.20166	11.7516	13.4311	16.4999	22.3886	7.29071
351.5	-5.88242	-4.46893	-5.38538	-2.72891	1.32968	6.30984	11.4849	13.4276	16.5952	22.2195	7.18094
352.5	-6.10626	-4.49863	-5.31036	-2.6785	1.61719	5.74658	11.2536	13.2639	16.6999	22.3648	7.09189
353.5	-6.53867	-4.59433	-5.29123	-2.43045	1.24454	5.42273	11.2813	13.076	16.3991	22.5242	7.04852
354.5	-6.38086	-4.70486	-5.30606	-2.82343	1.50156	5.5032	11.5392	13.1303	16.246	22.1285	6.89737
355.5	-6.23517	-5.09357	-5.31778	-2.91327	1.13593	5.44656	11.3888	13.042	15.9784	21.8636	6.67041
356.5	-5.93829	-4.98026	-5.25958	-2.91953	1.30508	5.25516	11.2599	13.1268	15.7788	21.673	6.40283
357.5	-5.9668	-4.73456	-5.14941	-2.94531	1.58633	5.51416	11.1259	13.0666	15.9487	21.7937	6.40555
358.5	-6.02228	-5.96463	-4.90021	-2.97421	1.53201	5.58133	10.8399	12.8479	15.9921	21.6773	6.62042
359.5	-5.79102	-8.10449	-4.88614	-2.97928	1.02655	5.10712	11.0622	12.6483	15.5964	21.5973	6.83994
360.5	-5.5582	-8.37869	-4.49084	-3.13437	1.10312	5.24814	11.0892	12.6447	15.6679	21.6844	6.67197
361.5	-5.71405	-8.24121	-4.35919	-3.2789	1.23126	5.50751	11.3653	12.9334	15.8253	21.7621	6.39777
362.5	-5.48788	-8.08301	-3.9588	-3.23553	1.33478	6.0372	11.9513	13.2666	15.9608	21.9566	6.45441
363.5	-5.45352	-7.53027	-3.60178	-3.04764	1.36093	5.8493	11.8712	13.5748	16.3706	22.0258	6.3876
364.5	-5.51682	-7.18808	-3.70645	-2.80585	1.23828	6.03094	11.731	13.6119	16.669	21.9828	6.74503
365.5	-5.48242	-7.61697	-3.61972	-2.96875	1.17462	5.72391	11.9599	13.6025	16.755	22.389	6.71454
366.5	-5.67853	-7.68732	-3.84006	-2.66641	1.3074	5.62119	11.847	13.3615	16.6065	22.2488	6.85986
367.5	-5.76602	-8.01425	-4.2381	-2.25232	1.17618	5.08133	11.6313	13.0815	16.6323	22.1953	6.50439
368.5	-5.89297	-8.43652	-4.11194	-2.36014	1.15314	4.64697	11.7915	13.3576	16.7038	22.0488	6.25128
369.5	-5.9465	-8.56464	-4.15762	-2.8035	1.03165	4.754	11.5755	13.3643	16.6765	22.0168	6.33878
370.5	-5.99844	-8.65839	-4.33615	-2.76874	1.36212	5.629	11.0794	13.0771	16.4651	21.9063	6.35516
371.5	-5.78281	-8.69434	-4.43222	-2.88162	1.38632	5.68759	11.131	12.8244	16.6464	21.9355	5.97784
372.5	-6.10196	-8.71503	-4.60568	-2.61914	1.42267	5.14853	11.2724	12.7803	16.603	21.7418	6.14502
373.5	-6.18164	-8.49902	-4.6459	-2.40546	1.17813	4.90439	11.304	12.8959	16.4417	21.8558	6.354
374.5	-6.09375	-8.53964	-4.54474	-2.61133	1.25	4.80127	10.9989	12.9232	16.378	21.7926	5.85516
375.5	-6.43164	-8.98065	-4.76309	-2.84726	1.284	4.73993	10.6235	12.8096	16.2554	21.3871	5.64191
376.5	-6.65469	-8.9826	-4.97208	-3.36093	1.00507	4.75244	10.5884	12.4783	15.6659	21.484	5.68213
377.5	-7.15781	-9.06699	-5.00333	-3.53476	0.923431	4.97861	10.6681	12.2283	15.8237	21.6594	5.92822
378.5	-6.95978	-8.71033	-5.01074	-3.29453	0.759003	5.54462	10.8161	12.1053	15.6612	21.6816	6.03995
379.5	-6.70587	-8.31113	-5.26309	-3.34766	0.826172	5.97156	10.4665	12.267	15.9288	21.5773	6.12744
380.5	-6.759	-8.31818	-4.98886	-3.70154	0.600006	5.98523	10.4341	12.0053	15.6593	21.3141	5.82391
381.5	-7.04922	-8.78809	-4.86545	-3.58395	0.452728	5.99072	10.6423	12.1912	15.4679	21.1101	5.28995
382.5	-6.37851	-8.96933	-4.7041	-3.23633	0.662903	6.15399	10.5915	12.2924	15.7175	20.9851	5.1954
383.5	-5.81876	-8.51074	-4.84473	-3.18085	0.880463	6.41766	10.6056	12.3596	15.8593	21.3504	5.55011
384.5	-5.63321	-8.01816	-4.5799	-2.90469	0.8703	6.36298	10.5806	12.074	16.105	21.359	5.80829
385.5	-5.70782	-8.19043	-4.47522	-2.82968	0.911713	6.26337	11.1142	12.2885	16.0101	21.502	5.81689
386.5	-5.71249	-8.3916	-4.55295	-2.78906	0.974609	6.26416	11.2513	12.3623	16.2296	21.6848	5.85791
387.5	-6.04065	-8.19824	-4.33926	-2.66055	1.3074	6.33878	11.2884	12.5647	16.2358	21.5059	5.66965
388.5	-5.88165	-7.79471	-3.9592	-2.78592	1.27499	6.17783	11.5294	12.7068	16.0749	21.5332	5.58017
389.5	-6.39218	-7.7666	-4.41193	-2.56171	1.32657	5.99579	11.5126	12.8436	15.8878	21.5418	5.70868
390.5	-6.48828	-8.49628	-4.98419	-3.00232	0.983612	5.38251	11.1751	12.6182	15.7765	21.4301	5.67783
391.5	-6.48868	-8.56268	-4.78458	-2.97421	0.948059	5.30945	11.1935	12.4775	15.7745	21.4105	5.38254
392.5	-6.05624	-8.32245	-4.64865	-3.40076	0.810547	5.32196	11.0981	12.6065	15.5491	21.298	4.98056
393.5	-6.25586	-8.80722	-4.62051	-3.35663	0.732422	5.24463	10.8896	12.7576	15.2507	21.1613	5.07236
394.5	-6.42712	-8.38651	-4.79449	-3.50186	1.03134	5.15048	10.9359	12.8469	15.4146	21.5204	5.40494
395.5	-3.48718	-5.46527	-2.36044	-0.645294	3.67142	5.10736	13.2907	15.6975	18.2166	21.8924	5.8811
396.5	-14.7515	-17.3079	-16.8024	-14.6168	-5.74509	6.33734	3.9173	5.05621	8.71265	20.114	5.33978
397.5	-24.318	-25.7045	-22.4034	-20.6555	-15.4395	-8.46085	-5.4342	-2.86362	0.754425	7.8385	-5.6442
398.5	-27.5573	-29.4698	-26.3139	-24.039	-18.6006	-12.6398	-8.83185	-5.67221	-2.38495	4.49414	-8.3114
399.5	-28.6787	-31.0928	-30.9258	-24.8813	-20.146	-14.8819	-9.98318	-6.71301	-3.33932	2.94592	-9.07553
400.5	-28.7103	-31.2654	-34.3221	-24.9594	-20.7433	-15.1935	-10.6943	-7.39105	-3.41541	2.33475	-8.67859
401.5	-28.7071	-30.7549	-34.9753	-24.6682	-20.6299	-15.087	-10.3721	-7.24869	-2.89151	2.36819	-7.98734
402.5	-28.6348	-29.8291	-35.2119	-24.7456	-20.4599	-15.1918	-10.1437	-7.20425	-3.19009	2.30701	-7.60294
403.5	-28.4455	-26.9309	-35.3749	-24.4902	-20.527	-15.3012	-9.73178	-6.92847	-3.76151	1.81662	-8.48734
404.5	-29.0275	-25.4514	-35.8771	-24.7133	-21.0812	-15.688	-10.1475	-7.07971	-4.27448	1.47037	-7.85013
405.5	-29.2105	-26.1335	-35.8447	-25.2944	-21.1722	-15.9499	-10.4656	-7.45837	-4.80347	1.53265	-10.0389
406.5	-29.5264	-26.2693	-36.0157	-25.4447	-21.2552	-16.2502	-10.6325	-7.92307	-5.03284	1.34717	-10.9204
407.5	-29.5977	-26.5352	-36.4571	-25.5572	-21.6088	-16.1939	-11.0151	-8.61627	-5.0723	1.42874	-11.3769
408.5	-30.1012	-26.5273	-36.8714	-25.6833	-21.7334	-16.3394	-11.4211	-8.98361	-4.94586	1.4942	-11.6693
409.5	-30.172	-26.8919	-37.1801	-26.274	-21.6252	-16.6945	-11.5219	-8.86478	-5.03415	1.5567	-11.4549
410.5	-30.1345	-26.8848	-37.2019	-26.0885	-21.7986	-16.9183	-11.4656	-8.91449	-5.23291	1.62375	-11.502
411.5	-29.928	-26.8209	-37.4564	-26.0754	-21.8645	-16.9061	-11.6591	-8.70697	-5.1619	1.28677	-11.4484
412.5	-30.0113	-26.2906	-37.3088	-25.5932	-21.4496	-16.7983	-11.6695	-8.42532	-5.17307	1.01138	-11.0037
413.5	-29.2267	-25.9929	-36.7535	-25.3631	-21.4933	-16.168	-11.1514	-7.93707	-5.11752	1.1235	-10.5894
414.5	-28.8047	-25.6728	-36.2419	-25.3469	-21.3074	-15.539	-10.6841	-7.51572	-4.85641	1.5824	-10.6761
415.5	-29.153	-25.8239	-36.0546	-25.166	-21.6133	-15.5275	-10.9852	-7.57886	-4.73972	1.61969	-10.7923
416.5	-29.1236	-26.262	-36.1192	-25.49	-21.7646	-16.1147	-11.1107	-7.48416	-4.68448	1.45795	-10.9218
417.5	-29.4268	-26.8269	-36.5686	-25.8916	-21.7323	-16.4813	-11.1873	-7.64215	-4.77783	1.63162	-10.9902
418.5	-29.6667	-27.5678	-37.3027	-26.158	-21.9621	-16.4753	-11.4551	-7.91684	-5.18253	0.990051	-11.5808
419.5	-29.7743	-27.1973	-37.5723	-25.7709	-21.8885	-16.6005	-11.3918	-8.14011	-5.15353	0.717346	-11.5018
420.5	-29.6629	-26.8297	-37.4206	-25.6263	-21.7765	-16.6195	-11.2219	-8.58417	-5.02237	0.7099	-10.5784
421.5	-29.6265	-27.1326	-37.3568	-25.861	-21.3551	-16.872	-11.5758	-8.92136	-5.26096	0.673279	-10.4203
422.5	-29.3394	-27.1025	-37.1809	-25.8116	-21.4665	-17.0898	-11.5063	-8.82941	-5.42142	0.840149	-10.526
423.5	-27.1244	-24.226	-34.6083	-23.0273	-19.73	-16.7493	-9.01239	-6.16043	-1.84509	2.47797	-9.00864
424.5	-26.1336	-23.7078	-34.6194	-23.0458	-18.818	-13.7967	-8.53857	-6.09634	-1.89011	4.24445	-8.29428
425.5	-25.9253	-23.0732	-33.978	-23.1081	-18.4598	-13.7503	-7.95053	-5.71542	-1.95908	4.05899	-8.09546

## Sheet: Fig4C SPR V606APB2 627-NPR416A
Time (s)	7.81nM	15.63nM	31.25nM	62.5nM	125nM	250nM	500nM	1000nM	2000nM	4000nM	8000nM
2.5	14.5756	13.8494	13.2938	12.5654	13.1836	12.8183	14.5964	12.6455	12.6724	12.1852	39.7433
3.5	-1.44235	-2.12561	-2.45853	-3.27017	-2.95859	-3.71765	-1.76923	-3.40054	-3.39328	-3.22452	24.2566
4.5	-3.0611	-3.20413	-3.74133	-4.68033	-3.94687	-5.25244	-3.43799	-4.83804	-5.11163	-4.28857	21.9308
5.5	-3.41345	-3.17603	-4.19055	-5.34946	-3.99103	-5.62	-3.63522	-5.13766	-5.8425	-4.69913	20.6402
6.5	-1.93063	-1.69205	-2.54251	-3.94516	-2.6629	-3.94266	-2.26727	-3.45172	-4.1507	-3.2175	21.4457
7.5	-2.01385	-1.72681	-2.62454	-3.59085	-2.40155	-3.32626	-1.98798	-2.67947	-3.6843	-2.92023	20.6215
8.5	-2.11893	-1.79788	-2.96866	-3.80768	-2.78281	-3.6196	-1.73721	-2.64899	-3.76788	-3.05695	14.4308
9.5	-2.15994	-1.53656	-2.86127	-3.67758	-2.87265	-3.70477	-1.89539	-2.77127	-3.99405	-3.46631	9.36562
10.5	-2.17673	-1.64203	-2.67142	-3.17838	-2.57501	-3.60983	-1.93484	-3.20917	-4.32101	-3.246	7.33321
11.5	-2.27985	-1.79202	-2.58118	-3.38345	-2.59415	-3.42078	-2.38446	-3.47281	-4.70694	-3.37064	4.31639
12.5	-1.87244	-1.89713	-2.58508	-3.45221	-2.54611	-3.36179	-1.8204	-3.31033	-4.68079	-4.02023	2.46132
13.5	-2.87869	-2.48853	-3.1507	-3.91901	-3.11249	-3.53915	-2.63406	-3.95132	-4.86203	-5.39249	0.288269
14.5	-3.82596	-2.8811	-3.34329	-4.31354	-3.53439	-3.68329	-3.07782	-3.87985	-4.84561	-5.82959	-1.58908
15.5	-3.95758	-3.2225	-3.50616	-4.21158	-4.12616	-4.14578	-3.01611	-4.05835	-4.78586	-5.50812	-2.56212
16.5	-3.52594	-3.27679	-3.83038	-4.39166	-4.18048	-4.26218	-3.30359	-4.47711	-4.89914	-5.17764	-3.05391
17.5	-3.49979	-3.48697	-4.09955	-4.59634	-4.26758	-4.81531	-3.55243	-4.77634	-5.19482	-5.24835	-3.90625
18.5	-3.40054	-3.53186	-4.14758	-4.32642	-4.10663	-5.20908	-3.41376	-4.75525	-5.29443	-5.27374	-4.37775
19.5	-3.28024	-3.6022	-4.03156	-4.54086	-4.18634	-5.36728	-3.56335	-4.57126	-5.46124	-5.5253	-4.99376
20.5	-3.35876	-4.07446	-3.62491	-4.76822	-4.63751	-5.30984	-3.48056	-4.62283	-5.22803	-5.73663	-5.43634
21.5	-3.03806	-3.71393	-3.04291	-4.80533	-4.2543	-4.99033	-3.28174	-4.74664	-4.90695	-5.4054	-5.37267
22.5	-2.63962	-3.49088	-2.76828	-4.71509	-3.94531	-4.55008	-3.14227	-4.39001	-4.42648	-4.76788	-4.96408
23.5	-2.27048	-3.32483	-2.8089	-4.62915	-3.84845	-3.94968	-3.13171	-4.39117	-4.17648	-4.33313	-4.74141
24.5	-1.724	-3.22681	-2.42804	-3.97446	-3.74063	-3.86765	-3.09891	-4.14157	-3.99289	-4.17453	-4.15587
25.5	-1.48416	-2.37329	-1.72922	-3.54752	-3.33124	-3.6954	-2.33289	-3.39081	-3.24875	-3.5593	-3.36485
26.5	-1.81384	-2.01587	-1.73587	-3.63541	-3.04102	-3.41376	-1.94852	-2.69745	-3.08859	-3.72766	-3.26915
27.5	-2.53964	-2.09906	-1.30618	-3.46548	-2.86603	-3.22235	-1.92313	-2.4357	-3.16867	-3.68741	-3.22227
28.5	-3.33026	-2.1221	-1.79953	-3.96078	-3.19727	-3.30124	-2.0665	-2.9072	-3.2468	-3.746	-3.57657
29.5	-3.74042	-2.49008	-2.72806	-4.19516	-3.78827	-3.40125	-2.75671	-3.63766	-3.82492	-4.25772	-4.54219
30.5	-4.0697	-2.73422	-3.00342	-4.67291	-4.26407	-3.48563	-3.07471	-3.92752	-4.53116	-4.82687	-5.18243
31.5	-3.8826	-2.36703	-3.27921	-4.33658	-3.88867	-3.82312	-3.00125	-3.64001	-4.53741	-5.16827	-4.92345
32.5	-3.8537	-2.26782	-3.81125	-4.4487	-4.27695	-3.85242	-3.38211	-3.83844	-4.35147	-5.27844	-5.54141
33.5	-4.03339	-2.62369	-3.59601	-4.28149	-4.24609	-3.92001	-3.51846	-3.94901	-4.5296	-5.43546	-6.41563
34.5	-3.67282	-2.87369	-3.54172	-3.75296	-3.84451	-3.92001	-3.43057	-3.64273	-4.29092	-4.84796	-6.23125
35.5	-4.07556	-3.52484	-3.72101	-4.39713	-3.88361	-4.10672	-3.63522	-3.92047	-4.5296	-4.94992	-5.63947
36.5	-4.06345	-3.99243	-3.83899	-4.48581	-4.26212	-5.02939	-4.18994	-4.60562	-4.83743	-5.5878	-5.6922
37.5	-3.95917	-4.17563	-4.26553	-4.15961	-4.35663	-5.15125	-4.1626	-4.81229	-5.1839	-5.53976	-5.82422
38.5	-4.43024	-4.28186	-4.14914	-4.05649	-4.17813	-5.11179	-3.74463	-4.68063	-5.22372	-5.60342	-6.24611
39.5	-5.03455	-4.35767	-4.03937	-4.45883	-4.21915	-5.04382	-3.37234	-4.63025	-5.49915	-5.33664	-6.26172
40.5	-4.55292	-4.10846	-3.63937	-4.92133	-3.91132	-4.78094	-3.14853	-4.21344	-5.4718	-4.90381	-6.29689
41.5	-3.98376	-3.92407	-3.65381	-5.07837	-3.60626	-4.4415	-3.14893	-4.31345	-4.71594	-4.63351	-5.8336
42.5	-3.7908	-3.55923	-3.45734	-4.55573	-3.54803	-4.0239	-2.79306	-3.69705	-4.51007	-4.21594	-5.05275
43.5	-2.53259	-2.4733	-1.78976	-2.83463	-2.92618	-3.30438	-2.21494	-2.94431	-3.95889	-3.26437	-3.95978
44.5	-0.263855	0.321625	0.501648	-1.0737	0.145325	-0.927429	0.322174	0.384583	-0.683105	-0.564362	-0.7547
45.5	0.0248413	0.312653	0.614532	-0.920166	-0.349609	0.603424	-0.0270386	0.174438	-0.325684	-0.321777	-0.50235
46.5	0.290833	0.315002	0.755951	-0.544006	-0.433594	0.743286	-0.154755	0.0658569	0.086792	0.10672	-0.602356
47.5	0.556458	0.310303	0.472351	-0.114685	-0.00977	0.937805	0.0831299	0.384979	0.402435	0.751648	-0.284378
48.5	0.949432	0.65094	0.372345	-0.184998	0.295715	1.01358	0.053833	0.343964	0.593445	0.917664	0.197647
49.5	0.603729	0.707184	0.540314	-0.294769	0.380859	1.01007	-0.458679	0.160004	0.323517	0.555939	0.187103
50.5	0.0713196	0.636475	0.443451	0.169678	0.0839844	0.701477	-0.196564	0.123657	0.407501	0.334473	0.305069
51.5	-0.0728149	0.204041	-0.0128174	0.224762	-0.136719	0.26593	-0.0489197	0.00842	0.285248	0.0641479	0.206253
52.5	0.0318604	-0.35141	-0.252258	-0.0787659	0.116394	0.0194397	-0.284058	0.0271912	-0.0370178	-0.0292053	-0.0539093
53.5	-0.0345459	-0.449829	-0.073761	-0.174866	0.120697	-0.474304	0.0487366	-0.115021	-0.266327	-0.252655	-0.201569
54.5	0.00412	-0.0393066	-0.104614	-0.140869	-0.184387	-0.512573	0.480774	-0.0443115	-0.389374	-0.116699	-0.255859
55.5	0.113098	0.246246	-0.199921	-0.518219	-0.450378	-0.29422	0.546783	0.0670166	-0.265137	0.145782	-0.295715
56.5	-0.212677	0.0942993	0.0574951	-0.97757	-0.628143	-0.468048	0.625702	0.131073	-0.347961	0.0520325	-0.355865
57.5	-0.750946	-0.201813	0.20282	-1.18384	-0.667572	-0.851654	0.781158	0.142792	-0.642487	-0.263184	-0.228531
58.5	-1.03534	-0.718597	-0.247955	-1.82916	-1.07306	-1.44226	0.395233	-0.108368	-1.13977	-0.602264	-0.873047
59.5	-0.484924	-0.767426	-0.54483	-1.64828	-0.862885	-1.35751	0.579224	-0.0892334	-1.22607	-0.38623	-1.06485
60.5	-0.21344	-0.636566	-0.844452	-1.1264	-0.71875	-0.982513	0.995636	0.158417	-0.926483	-0.408905	-1.26993
61.5	-0.702515	-0.390869	-0.910461	-0.509216	-0.864838	-0.393036	1.65109	0.186951	-1.10812	-0.499146	-1.25197
62.5	-0.575165	-0.217804	-0.555786	-1.21274	-0.728516	0.0639954	1.83038	0.304138	-0.524536	0.00125	-0.643372
63.5	-1.59549	-1.43304	0.893036	0.0982056	-1.66757	-0.815308	0.604218	-1.15369	-1.52493	-0.20929	-1.69922
64.5	6.82678	5.92517	9.33368	7.48492	4.49725	3.93744	6.35147	3.05063	2.19266	4.08914	2.2043
65.5	36.5229	33.4076	17.311	9.20328	19.1406	10.3737	19.6362	10.7518	6.63016	6.06921	16.8
66.5	20.6237	15.6724	7.38171	-2.02524	-11.7141	-8.10477	-21.7501	-29.4779	-35.5573	-22.4097	12.7457
67.5	14.1537	13.2377	10.6829	7.26694	4.46133	-6.48798	3.16397	1.28696	2.60086	3.46689	21.1746
68.5	9.59161	10.4544	9.19382	7.85016	9.25586	7.7886	11.6609	12.6295	16.4415	20.1009	31.0023
69.5	6.88187	7.91071	6.80399	5.49274	8.08594	9.13507	11.4636	13.2198	17.5743	22.5841	31.9922
70.5	4.96234	6.10056	4.94617	3.50522	6.09845	7.41476	10.0698	12.0112	16.3723	21.8321	30.9898
71.5	3.74435	4.7767	3.8454	2.16852	4.96484	5.81631	8.88858	11.0026	15.4181	20.7614	29.9937
72.5	3.02325	3.7814	3.1868	1.39505	3.97305	4.88507	8.32608	10.4627	14.6196	20.097	29.1578
73.5	2.00882	3.21149	2.75751	1.14935	3.34219	4.22455	7.82413	10.2862	14.7727	19.9427	28.9266
74.5	1.70764	2.70444	2.42508	1.09311	3.04843	3.9007	7.62296	10.2877	14.877	20.0891	28.7476
75.5	1.48694	2.25055	2.15869	0.947815	3.14804	3.74524	7.77219	10.3604	14.9251	20.286	28.7625
76.5	1.17249	1.83063	2.09811	0.618896	2.91992	3.79016	7.84952	10.4174	15.3872	20.4821	28.6508
77.5	0.834198	1.67242	2.10007	0.71225	2.78516	3.57416	7.83508	10.6573	15.9013	20.5274	28.7488
78.5	0.646698	1.52789	1.75751	0.667328	2.56836	3.53665	7.89914	11.0561	16.1118	20.6587	28.8402
79.5	0.371307	1.23959	1.37274	0.527496	2.46445	3.79834	7.95227	11.2967	16.3145	21.1243	28.7961
80.5	0.114288	0.990784	1.2825	0.534515	2.59885	3.82959	8.04834	11.3553	16.6501	21.2552	29.1145
81.5	-0.159149	0.756805	1.14072	0.394287	2.57928	3.98352	8.39679	11.7002	16.8024	21.3001	29.2164
82.5	-0.346283	0.585297	0.724701	0.318115	2.59454	4.01868	8.58624	11.7619	17.0591	21.8821	29.3418
83.5	-0.395477	0.543121	0.422333	0.235687	2.34531	3.9046	8.82413	11.8592	17.4798	21.9278	29.2804
84.5	-0.507202	0.43454	0.305145	0.193115	2.13281	3.85657	8.96085	11.9608	17.6696	21.9114	29.5953
85.5	-0.588837	0.145477	0.14267	0.175934	2.24609	4.01282	8.96204	11.9764	17.8384	22.0028	29.4895
86.5	-0.923218	0.0700684	-0.0667114	0.00366	2.2164	4.21475	9.19171	12.0975	18.0446	21.913	29.3777
87.5	-0.945496	-0.0654602	0.0762329	-0.0404663	2.09885	4.07336	9.46826	12.5123	18.2798	22.0587	29.434
88.5	-0.768524	-0.0014	0.106323	0.0704651	2.20975	4.41751	9.80264	12.7627	18.5388	22.5298	29.4473
89.5	-0.862274	-0.178741	0.184845	0.120453	2.3746	4.41241	10.2093	13.1248	18.6259	22.6599	29.6648
90.5	-1.16464	-0.0439758	0.181335	0.0978088	2.25116	4.54718	10.3523	13.3279	19.118	22.822	29.4054
91.5	-1.08102	-0.0397034	0.371948	0.197418	2.62109	4.82532	10.6249	13.3725	19.4915	22.8786	29.4371
92.5	-0.99823	0.191162	0.707092	0.177094	2.87811	5.04407	10.8769	14.0323	20.1646	22.9661	29.6937
93.5	-0.636108	0.316956	1.09189	0.473969	2.92813	5.38156	11.0694	14.5463	20.345	23.1981	29.7012
94.5	-0.612671	0.720062	1.16336	0.600922	3.06641	5.56436	11.4206	14.8522	20.7208	23.638	30.0555
95.5	-0.416199	0.886475	1.19736	0.605621	3.23944	5.77335	11.6687	15.2733	21.343	23.9321	30.2961
96.5	-0.58493	1.05484	1.00671	0.591156	3.44415	5.87805	11.7206	15.4772	21.4895	24.3181	30.3777
97.5	-0.643127	0.984528	1.00516	0.624359	3.52188	5.97571	11.6253	15.5307	21.6106	24.6095	30.3734
98.5	-0.790405	0.688049	0.803986	0.556	3.62225	6.03156	11.5843	15.6256	21.8094	24.9142	30.3016
99.5	-0.913849	0.341949	0.816864	0.606781	3.58554	6.45578	11.8148	15.8549	21.8337	25.322	30.2383
100.5	-1.09705	0.0931396	0.679382	0.539581	3.33749	6.42532	11.9808	15.9139	21.9337	25.1473	30.3328
101.5	-0.929077	0.113831	0.432892	0.39389	3.37851	6.28	11.9976	16.1198	21.9321	25.172	30.323
102.5	-1.01852	-0.182678	0.0594482	0.27243	3.36679	6.07767	12.0999	16.1905	22.1681	25.4227	30.1738
103.5	-1.22906	-0.620178	-0.233917	0.288422	3.25821	6.04367	12.3105	16.1131	22.0833	25.3321	30.2508
104.5	-1.19745	-0.806091	-0.280396	0.156799	3.24298	6.11478	12.5335	16.2686	21.8005	25.0278	30.2359
105.5	-1.38455	-0.759613	-0.483124	0.0638123	3.27579	6.21085	12.7046	16.1463	21.9348	24.9817	30.1601
106.5	-1.56854	-0.635406	-0.483124	0.0587463	3.1004	6.33118	13.0081	16.3405	22.0974	25.0934	30.0477
107.5	-1.9064	-0.473297	-0.395233	0.199371	2.8797	6.13898	13.3933	16.5862	22.0891	24.9423	30.1062
108.5	-1.9455	-0.458069	-0.131165	-0.00922	2.92578	6.14133	13.6281	16.6494	22.1458	24.8157	29.9976
109.5	-1.84314	-0.392029	-0.0643616	-0.334625	2.80936	6.24094	13.8097	16.5358	22.1473	24.7442	30.0679
110.5	-1.84274	-0.34906	0.0715637	-0.125641	2.92264	6.53506	13.6573	16.8381	22.4067	24.8544	30.2012
111.5	-1.73883	-0.41507	0.143829	0.129822	3.1207	6.63507	13.3765	17.1709	22.7833	24.9915	30.0488
112.5	-1.72009	-0.211945	0.259064	0.313812	3.10822	6.84094	13.3874	17.3213	22.9149	25.2024	30.243
113.5	-1.90094	0.188446	0.742279	0.573975	3.43048	7.08975	13.562	17.5799	23.0532	25.4395	30.3246
114.5	-1.99078	0.287262	0.637177	0.591553	3.65976	7.24405	14.1585	17.9912	23.4247	25.7028	30.5066
115.5	-1.47284	0.55835	1.0032	0.771637	3.98944	7.51749	14.4304	18.2912	23.8368	25.8005	30.6078
116.5	-1.37753	0.565002	1.31454	0.73999	4.29221	7.82727	14.7558	18.3639	24.1595	26.2271	30.7265
117.5	-1.33298	0.447418	1.35086	0.892334	4.35547	7.70853	14.9542	18.6397	24.2778	26.3794	30.6781
118.5	-1.2326	0.433746	1.21533	0.906006	4.3703	7.82883	15.0476	18.6272	24.4325	26.6005	30.5629
119.5	-1.30328	0.36734	0.903595	0.883331	4.39493	8.1304	15.1019	18.4479	24.2993	26.754	30.4527
120.5	-1.51581	0.298981	0.755951	0.784912	4.35703	8.23001	14.853	18.6506	24.1149	26.7106	30.2785
121.5	-1.70331	0.0466309	0.621582	0.513428	4.28906	8.09055	14.9589	18.5565	24.0181	26.7591	30.2808
122.5	-1.67593	0.0220337	0.579376	0.394287	4.23712	7.90735	14.9265	18.3694	24.0934	26.9208	30.4047
123.5	-1.93024	-0.0432129	0.402435	0.327484	3.95352	7.93118	15.0253	18.2807	23.9962	26.8602	30.2844
124.5	-1.93219	-0.0471191	0.363739	0.323181	3.92108	7.93506	14.9038	18.3924	23.6954	26.7017	30.1074
125.5	-1.91464	-0.0596008	0.215698	0.254059	3.57889	7.79172	14.7315	18.5455	23.4618	26.4907	30.0805
126.5	-1.98807	-0.153351	0.187195	0.204041	3.48749	7.72025	14.814	18.6447	23.4892	26.4981	29.9625
127.5	-2.26501	-0.215851	0.000458	0.230621	3.46719	7.68744	14.9968	18.8963	23.6829	26.5481	29.7777
128.5	-2.48492	-0.246735	-0.0635986	0.164215	3.27655	7.6929	15.0577	18.7705	23.9344	26.4317	29.7816
129.5	-2.60214	-0.368988	-0.0979614	0.322815	3.46875	7.8132	15.0331	18.8776	24.1724	26.4067	29.9555
130.5	-2.36774	-0.474854	-0.198364	0.288025	3.59491	7.93665	15.3472	19.0737	24.2067	26.2341	29.7812
131.5	-2.25174	-0.483063	-0.0901489	0.263824	3.69336	8.04211	15.246	19.1893	24.4478	26.2114	29.4394
132.5	-2.13181	-0.369385	-0.149933	0.318115	3.59259	8.16867	15.4714	19.294	24.8032	25.9169	29.4277
133.5	-1.95953	-0.329132	0.059082	0.18335	3.81876	8.19717	15.5749	19.444	25.1274	26.0446	29.4898
134.5	-1.61032	-0.204132	0.00476	0.269684	4.15781	8.39679	15.63	19.4901	25.3931	26.2645	29.1973
135.5	-1.62323	-0.147888	0.334076	0.49585	4.51993	8.45889	15.9558	19.6791	25.3806	26.1841	29.0972
136.5	-1.87283	-0.0838318	0.488739	0.750549	4.87891	8.52725	16.1616	19.8924	25.338	26.4751	29.2586
137.5	-1.81815	0.052887	0.314148	0.92749	4.98593	8.8042	16.2538	20.2119	25.4942	26.8028	29.45
138.5	-1.94781	0.164215	0.386017	0.981781	5.3707	9.2421	16.6452	20.2026	25.6251	27.0626	29.4219
139.5	-1.74744	0.189606	0.333679	0.829041	5.22421	9.36478	16.4476	20.3823	25.5911	26.8489	29.243
140.5	-1.90564	0.113831	0.252441	0.412262	5.29688	9.37375	16.4167	20.4158	25.5349	26.7977	29.2023
141.5	-1.8869	0.156403	0.346558	0.514191	5.48633	9.46045	16.2937	20.335	25.381	26.9235	29.0723
142.5	-1.9064	-0.076416	0.47821	0.338043	5.30038	9.32843	16.2671	20.4799	25.2048	26.9071	28.9254
143.5	-1.93179	-0.288513	0.334442	0.164581	5.04922	9.35266	16.1335	20.4081	25.2024	26.9403	28.827
144.5	-2.15485	-0.210785	0.217255	0.0106812	4.57346	8.98819	16.169	20.4073	24.9513	26.718	28.6527
145.5	-2.19821	-0.238922	0.0364075	0.21109	4.58868	8.9761	16.2011	20.2389	24.881	26.6555	28.4426
146.5	-2.3439	-0.498291	-0.248352	0.333344	4.47031	9.0011	16.1425	20.3424	24.8138	26.763	28.4492
147.5	-2.61072	-0.609222	-0.175323	0.316956	4.23944	8.8046	16.0945	20.1245	24.8567	26.5013	28.5269
148.5	-2.45718	-0.836182	-0.13858	0.24234	4.0625	8.64407	16.1874	19.9565	24.7169	26.4806	28.5402
149.5	-2.3111	-0.961182	-0.380402	0.513031	4.02969	8.6265	16.0964	19.8467	24.5392	26.5169	28.5516
150.5	-2.34079	-1.1264	-0.45929	0.456787	3.9418	8.66946	16.0163	19.924	24.5446	26.3743	28.5133
151.5	-2.3201	-1.01743	-0.54953	0.288025	3.75742	8.55618	16.044	20.0217	24.7083	26.2532	28.5035
152.5	-2.38376	-0.831482	-0.597565	0.322418	3.81329	8.59561	16.1554	20.11	25.0649	26.3634	28.4363
153.5	-2.57361	-0.772125	-0.589752	-0.135803	3.88907	8.54483	16.2655	20.142	24.9673	26.2958	28.5137
154.5	-2.49588	-0.331482	-0.542511	-0.0514221	4.08243	8.77103	16.3675	20.174	24.9661	26.2368	28.3547
155.5	-2.25055	-0.281097	-0.230774	-0.0533752	4.27148	9.04132	16.7542	20.778	25.0309	26.4298	28.3183
156.5	-2.04041	-0.142822	-0.0702209	-0.0221252	4.6207	9.28937	17.0265	21.0959	25.2087	26.4872	28.3742
157.5	-1.85681	0.171234	0.035614	0.232941	4.89804	9.31436	17.137	21.5869	25.3731	26.7083	28.4215
158.5	-1.82831	0.406403	0.285614	0.30954	4.98553	9.39133	17.1507	21.5717	25.6462	26.7888	28.3535
159.5	-1.65955	0.357971	0.283691	0.511475	5.07773	9.48392	17.4175	21.6494	25.5411	26.9688	28.3898
160.5	-1.65448	0.180237	0.48172	0.639191	5.0379	9.61868	17.5089	21.7026	25.454	26.8317	28.4004
161.5	-1.73572	0.21228	0.654388	0.989594	5.17462	9.75891	17.4722	21.7076	25.3302	26.7325	28.55
162.5	-1.85956	0.181793	0.468445	0.92984	5.13788	9.76321	17.3433	21.7928	25.2364	26.7044	28.5398
163.5	-1.88571	0.136078	0.473114	0.841156	5.27499	9.92804	17.3085	21.66	25.4884	26.4614	28.6816
164.5	-1.82361	0.00406	0.348511	0.952087	5.05859	9.86398	17.3843	21.5674	25.4782	26.5907	28.5914
165.5	-2.02948	-0.00336	0.0403137	0.975525	4.97461	9.88312	17.2964	21.3037	25.302	26.6685	28.175
166.5	-2.14978	-0.235016	-0.118286	0.787659	4.83673	9.62415	17.2531	21.1158	25.1353	26.4993	28.4066
167.5	-2.11032	-0.386169	-0.24054	0.841949	4.67072	9.57416	17.1968	21.1385	24.9317	26.3368	28.373
168.5	-2.14508	-0.677979	-0.348755	0.747406	4.57968	9.56006	17.1906	20.8967	24.7032	26.5356	28.689
169.5	-2.31503	-0.820557	-0.532349	0.596252	4.50235	9.35577	16.9175	20.7221	24.736	26.6251	28.7766
170.5	-2.42908	-0.908844	-0.853424	0.613037	4.48868	9.3667	16.8843	20.7619	24.6989	26.4712	28.6109
171.5	-2.44977	-0.834625	-1.00342	0.595459	4.29572	9.19406	16.9944	20.6256	24.6516	26.4415	28.659
172.5	-2.47791	-0.681488	-0.831573	0.638428	4.47226	9.20813	17.0452	20.7686	24.7786	26.6032	28.6707
173.5	-2.49704	-0.549469	-0.705383	0.68454	4.43204	9.0636	16.9835	20.9295	24.8989	26.4419	28.6242
174.5	-2.43103	-0.356873	-0.799927	0.468903	4.47421	9.2515	16.948	21.0287	24.911	26.3298	28.4398
175.5	-2.383	-0.373688	-0.692505	0.516174	4.7836	9.32022	17.0569	21.0131	25.0645	26.4813	28.4344
176.5	-2.60681	-0.447113	-0.580383	0.606018	5.03986	9.31085	17.2327	21.1151	25.3177	26.7399	28.5082
177.5	-2.47479	-0.249451	-0.403046	0.786469	5.05899	9.56516	17.305	21.6295	25.6837	26.8372	28.5269
178.5	-2.15759	-0.13501	-0.127655	0.9646	4.98087	9.86282	17.4413	21.8389	25.7763	27.0001	28.7324
179.5	-2.07596	0.158752	0.476257	1.09039	4.99609	10.0148	17.5948	22.0272	25.9598	27.1665	28.8582
180.5	-1.98065	0.0817871	0.637177	1.11774	5.00156	10.1843	17.5862	21.9854	26.1106	26.0235	28.9027
181.5	-1.68298	-0.00806	0.474304	1.1138	5.04532	10.387	17.7484	22.1842	26.2669	20.2224	28.9375
182.5	-1.76932	-0.110382	0.298523	1.20013	5.13397	10.5976	17.9987	22.058	26.0696	19.4872	28.8394
183.5	-1.77554	0.0388184	0.112976	1.08334	5.14102	10.6296	17.7952	22.0901	26.1852	17.822	28.6766
184.5	-1.75055	-0.162354	-0.229218	1.20563	4.92889	10.1648	17.5351	21.7932	26.2423	17.7157	28.7195
185.5	-1.84744	-0.0744629	-0.260864	0.925537	4.95624	10.0683	17.3819	21.867	26.3723	19.3849	28.6102
186.5	-1.6951	-0.145935	-0.32843	0.822418	4.97385	9.79797	17.2323	21.9717	26.1263	20.1438	28.6051
187.5	-1.84158	-0.156097	-0.826477	0.77475	4.91641	9.64874	17.2409	21.7119	26.0794	20.752	28.5933
188.5	-2.22165	-0.304932	-1.16791	0.588806	4.95197	9.55695	17.3511	21.5721	26.347	23.0435	28.6043
189.5	-2.51581	-0.648285	-1.23587	0.561462	4.75977	9.58389	17.4128	21.5116	25.9106	26.3399	28.0578
190.5	-2.47049	-1.08694	-0.98468	0.216553	4.8172	9.37961	17.5796	21.5194	25.6923	26.9532	27.8406
191.5	-2.55603	-1.07367	-0.651093	0.158356	4.73126	9.1171	17.5132	21.5639	25.5138	26.6649	27.6652
192.5	-2.57675	-1.16196	-0.774536	0.239197	4.69882	9.05579	17.2187	21.4963	25.4431	26.3841	27.6344
193.5	-2.55878	-1.29517	-0.828033	0.211487	4.5293	8.97806	17.0905	21.2393	25.2868	26.3591	27.5008
194.5	-2.70367	-1.26117	-0.581177	0.14743	4.49924	8.93546	16.9651	21.1752	25.1192	26.4864	27.5176
195.5	-2.72986	-1.16977	-0.505798	0.288818	4.49609	8.76202	16.7425	21.4569	25.2056	26.6325	27.673
196.5	-2.39822	-0.987732	-0.407349	0.309906	4.55899	9.04993	16.9765	21.7381	25.5235	26.7489	27.6262
197.5	-2.2912	-0.851807	-0.265533	0.544281	4.8176	9.25967	17.1745	21.7862	25.6731	26.8954	27.7367
198.5	-2.18298	-0.611969	-0.161255	0.586853	5.01797	9.3765	17.4565	21.9713	25.7977	27.2837	27.9707
199.5	-1.91229	-0.312347	-0.0206299	0.875153	5.29257	9.77725	17.5714	22.1209	25.9876	27.3614	28.1711
200.5	-1.88885	0.0165405	0.0731201	0.95755	5.52225	9.84131	17.798	22.3256	26.1794	27.4173	28.3875
201.5	-1.87674	0.0220337	-0.23938	1.04312	5.33438	10.0526	18.0905	22.4323	26.2884	27.5368	28.3797
202.5	-1.69977	-0.0869446	-0.0374146	1.01654	5.49023	10.0913	18.2448	22.335	26.4305	27.7255	28.3441
203.5	-1.74979	-0.103363	-0.0155334	0.943115	5.61758	10.4769	18.5402	22.1033	26.504	27.843	28.4019
204.5	-1.72321	-0.0814819	-0.132721	1.02905	5.44141	10.2613	18.7343	21.9951	26.3368	27.8977	28.3652
205.5	-1.74042	-0.183044	-0.563995	0.996246	5.24374	10.2495	18.5706	21.799	25.9102	28.004	28.0887
206.5	-1.81931	-0.142029	-0.356171	0.719299	5.13126	10.0773	18.2902	21.7202	25.8517	27.7263	28.0504
207.5	-2.08533	0.068512	-0.533112	0.52243	5.15936	9.83624	18.0233	21.6205	25.6048	27.5509	28.0156
208.5	-2.1861	-0.0666504	-0.609283	0.469299	4.70157	9.70383	17.6003	21.6729	25.4259	27.5708	27.7695
209.5	-2.17517	-0.116241	-0.579224	0.203674	4.46484	9.64249	17.5421	21.662	25.4435	27.5938	27.7348
210.5	-2.29938	-0.28891	-0.577271	0.33493	4.38046	9.35733	17.6323	21.5971	25.395	27.3009	27.3961
211.5	-2.67517	-0.240479	-0.716705	0.375153	4.26288	9.03665	17.3944	21.6686	25.3684	27.2157	27.1727
212.5	-5.37399	-2.76898	-3.98428	-3.41196	1.77695	8.70694	15.3542	19.1799	22.9841	25.7704	27.0004
213.5	-0.217346	2.16031	3.98523	5.99118	7.27383	4.26398	18.4441	24.2467	27.8419	25.9848	23.8793
214.5	23.0545	26.5115	30.1466	30.8005	37.5816	20.473	50.6609	57.2889	57.5544	57.2165	44.4703
215.5	16.8346	21.8822	21.3915	26.2361	27.3758	44.8765	36.6218	37.2487	41.2755	28.1122	8.71132
216.5	6.0174	9.92123	8.80829	11.2728	20.6125	41.223	39.0468	39.3108	43.5575	50.6618	38.9039
217.5	2.65021	5.39273	4.57272	5.9892	11.4707	21.8831	25.2757	27.1612	31.1384	32.7384	27.9344
218.5	1.50256	3.91852	3.73874	4.44583	9.58829	16.2261	22.2503	25.1783	28.9309	29.113	24.35
219.5	0.168182	2.66968	3.21375	3.76813	8.67813	14.657	21.1112	24.2006	28.6173	28.5708	24.0015
220.5	-0.824768	1.60797	2.28641	3.04117	8.25275	13.646	20.2894	23.976	28.1411	28.354	23.6316
221.5	-0.558777	1.21384	2.07391	2.79156	7.98712	13.2351	19.9515	23.8963	28.2255	28.3227	22.8746
222.5	-1.2951	0.219299	0.972748	2.18921	7.29453	12.4026	18.9386	23.4475	27.7622	27.5032	22.1441
223.5	-4.16736	-2.04752	-2.03586	-0.546722	4.93359	10.6374	16.4444	21.2635	24.7286	25.5009	20.3441
224.5	-4.54391	-1.95883	-2.22491	-0.405334	3.82928	8.39639	15.0296	19.7932	23.8497	24.1532	18.3555
225.5	-4.48883	-1.88812	-2.17297	-0.238922	4.02734	8.42453	15.3058	20.0229	23.3521	23.9821	18.5504
226.5	-4.84744	-2.20023	-2.15616	-0.472107	4.07928	8.52725	15.7851	20.1248	23.3059	23.8267	18.6566
227.5	-5.14276	-2.7233	-2.74954	-0.597504	3.63086	8.14993	15.5753	19.6366	23.0305	23.2224	18.2898
228.5	-4.95953	-3.15884	-2.89212	-0.792816	3.05585	8.17142	15.5085	19.312	22.4513	22.9653	18.0793
229.5	-4.88339	-2.62796	-2.86319	-0.243591	2.86014	8.57336	15.5784	19.1158	22.1895	23.2227	17.8742
230.5	-4.51111	-2.26117	-2.54718	-0.0885315	3.26797	8.65775	15.6655	19.0702	22.4309	23.1665	18.1277
231.5	-4.79196	-2.05023	-2.19757	-0.531891	3.25116	8.48273	15.7573	19.3533	22.6454	22.9306	17.9047
232.5	-4.73026	-2.11038	-1.75616	-0.382263	3.52539	8.27725	15.8839	19.5975	22.9032	23.1153	17.7426
233.5	-4.48688	-2.54007	-1.9292	-0.742035	3.53906	8.48624	15.914	19.5932	22.9544	23.2259	18.548
234.5	-4.0318	-2.38501	-2.09055	-0.91507	3.51483	8.47687	16.0038	19.3416	22.8645	22.9251	18.3219
235.5	-3.79626	-1.88657	-1.85928	-1.02292	3.14648	8.58939	15.8847	19.1631	22.8188	22.7102	17.7684
236.5	-4.09589	-1.43384	-1.57608	-0.516266	3.51718	8.92764	15.8921	19.2819	23.0431	23.0149	18.0734
237.5	-3.50369	-0.91391	-0.948364	0.500549	4.57306	9.3511	16.8343	20.2737	24.329	23.8849	18.8594
238.5	-2.55643	0.298981	0.529755	2.06305	5.77109	10.0632	18.3898	21.4963	26.0313	25.1681	19.6742
239.5	-3.70993	-1.27094	-0.767517	0.241943	5.0285	10.2577	17.1019	20.0471	24.4067	24.1536	18.6226
240.5	-6.60565	-3.63892	-0.29837	1.44977	2.32266	7.60422	14.073	16.8827	21.6544	20.6497	16.2406
241.5	13.5377	21.0212	27.4341	31.5814	16.5828	18.4347	30.9616	34.6225	38.4513	41.4973	26.3582
242.5	65.8205	72.5998	64.6505	63.3189	61.9906	57.8026	77.4101	82.3444	83.5376	93.8583	62.7574
243.5	33.0119	25.3447	20.588	16.5955	48.3524	57.2898	53.8433	55.1061	60.7653	53.5114	65.5312
244.5	8.12131	8.28256	6.41611	5.21735	18.3535	24.223	28.5343	32.5952	35.6962	33.4302	32.1535
245.5	0.375214	1.65836	1.16061	1.23257	9.00821	14.2421	20.0991	23.6815	27.0681	26.5829	22.4168
246.5	-2.33923	-0.578369	-0.404205	0.0161743	6.14844	10.8351	17.1831	19.6764	24.411	24.6704	19.3301
247.5	-3.23611	-0.956482	-1.4628	-0.246338	4.99686	9.4046	16.1859	18.4494	23.5317	23.8321	18.5687
248.5	-3.63885	-1.4053	-2.11127	-0.845551	3.8176	8.47766	15.5558	17.8705	22.5845	22.956	18.2109
249.5	-3.80719	-1.44125	-1.95108	-0.526428	3.11368	8.21008	14.9198	17.5967	22.1555	22.4536	17.5582
250.5	-2.56149	-0.333832	-1.26166	0.365784	4.56174	9.23547	15.7003	18.644	23.3876	23.7208	18.4859
251.5	-2.96854	-1.15649	-2.10461	-0.702209	4.10858	9.04291	15.6776	18.2506	22.9966	23.3329	18.0594
252.5	-4.57089	-2.4975	-2.88156	-1.76978	2.29257	7.74329	14.5081	16.8576	21.3427	22.0727	16.4129
253.5	-4.91345	-2.79947	-3.1796	-1.80219	1.88281	7.34796	13.4937	16.1487	20.8204	21.4294	16.0308
254.5	-4.49664	-3.24554	-3.26672	-1.95221	1.88086	7.44992	13.6815	16.2065	20.6931	21.1427	16.1699
255.5	-4.47284	-3.53149	-3.19681	-1.66782	1.91406	7.68314	13.5952	16.0342	20.5282	20.952	15.9844
256.5	-4.67557	-3.45258	-2.72571	-1.27835	2.26056	7.95383	13.5249	16.0217	20.8114	21.1044	16.0785
257.5	-4.17401	-3.11313	-2.40109	-0.683838	2.70938	7.95459	13.9765	15.9854	20.8677	21.1231	16.2711
258.5	-3.85095	-2.95377	-2.59756	-0.666656	3.01678	8.32767	14.5363	16.017	21.0024	21.0305	16.325
259.5	-4.0744	-2.49945	-2.29877	-0.617035	3.15234	8.20422	14.5276	16.2838	21.1489	20.9126	16.3426
260.5	-4.17242	-2.36118	-2.09131	-0.207275	3.01172	7.86203	14.48	16.5018	21.3063	20.7056	16.5742
261.5	-4.18805	-2.65024	-2.20148	-0.201416	2.99609	7.6546	13.8511	16.6987	20.9759	20.679	16.3519
262.5	-4.30252	-2.49554	-2.8671	-0.832275	2.68475	7.32022	13.5233	16.2303	20.9278	20.8255	16.1152
263.5	-4.61151	-2.29788	-3.44916	-1.16507	2.341	6.98468	13.4921	15.7635	20.9751	20.9727	16.1465
264.5	-5.04001	-2.35492	-3.64993	-0.934998	2.4039	7.20538	13.7753	15.5803	20.4911	20.5755	16.0891
265.5	-5.0455	-2.20493	-3.57922	-1.32681	2.58359	7.41711	13.9214	15.4635	20.0587	20.4704	15.616
266.5	-4.79391	-2.17252	-3.32532	-1.44476	2.90549	7.46164	13.7843	15.3803	20.0169	20.468	15.2344
267.5	-4.86697	-2.24399	-3.38156	-1.22641	2.9711	7.44992	13.3839	15.6936	19.936	20.3423	15.1754
268.5	-4.974	-2.16937	-3.54837	-1.36118	2.79297	6.82571	12.8194	15.7209	19.8849	20.2642	14.9711
269.5	-4.90485	-2.16666	-4.09329	-1.85257	2.48007	6.23117	12.7073	15.278	19.5763	19.8911	14.8301
270.5	-4.70175	-2.37836	-4.15579	-1.82877	2.19962	6.155	12.8808	15.0916	19.1442	19.2911	14.3387
271.5	-4.86618	-2.49518	-4.11829	-1.73541	1.91681	6.24915	13.08	15.0799	18.6602	18.7591	14.0457
272.5	-4.63611	-2.47366	-3.78781	-1.77954	1.91562	6.13702	12.8331	15.1584	18.3521	18.7184	13.8859
273.5	-4.52362	-2.96274	-3.58078	-1.9686	2.14102	6.25226	12.6483	15.1557	18.5907	19.0915	13.8148
274.5	-4.19745	-3.02954	-3.25031	-1.93423	1.82578	6.49954	12.4382	14.9764	19.0923	19.3001	13.9394
275.5	-3.80719	-3.08383	-2.79092	-2.04987	1.50702	6.41711	12.6245	14.7557	19.2243	19.3665	14.0844
276.5	-3.54041	-2.77759	-2.47571	-1.77875	1.87891	6.18314	12.9589	14.7217	18.9962	19.2204	14.0012
277.5	-3.47244	-2.51859	-2.2886	-1.77679	1.79102	6.45187	13.1648	15.0018	18.7192	19.0833	13.9992
278.5	-3.76892	-2.6608	-1.93234	-1.71313	2.06134	6.84836	13.3589	15.1893	18.8247	18.9438	14.132
279.5	-4.00681	-2.69516	-1.63272	-1.77643	1.99805	7.02921	13.3198	15.4444	19.2462	19.2274	13.8078
280.5	-3.85095	-2.63306	-1.81125	-1.54596	1.8035	7.24368	13.3882	15.4006	19.6079	19.4591	13.7855
281.5	-3.90369	-2.46936	-2.09836	-1.43854	1.9715	7.29327	13.3167	15.3096	19.8606	19.7259	13.9449
282.5	-4.21463	-2.39594	-2.51752	-1.20181	2.02811	7.11633	13.2491	15.1955	19.779	19.8282	14.1395
283.5	-4.68533	-2.61664	-2.60226	-1.20377	2.07501	6.93314	13.3085	15.2784	19.6368	19.3864	13.8144
284.5	-4.77478	-2.54007	-2.54251	-1.04007	1.98749	6.24719	12.914	15.1272	19.5954	19.1306	13.5031
285.5	-4.6951	-2.89087	-2.77649	-1.03696	2.04413	6.22922	12.5769	14.5295	19.3087	18.7977	13.3246
286.5	-4.61893	-3.66156	-3.00186	-1.34479	1.78867	6.27179	12.9948	14.5108	19.3653	18.9067	13.1777
287.5	-4.08572	-3.5596	-2.90616	-1.48346	2.10391	6.42453	12.7808	14.6315	19.5891	19.1368	13.1074
288.5	-4.19275	-3.37094	-3.35577	-1.31976	2.13712	6.29367	12.4769	14.5022	19.797	19.1477	13.2828
289.5	-4.87009	-3.51508	-3.53156	-0.980713	1.6297	6.00656	12.3206	14.0983	19.4579	18.9231	12.9414
290.5	-5.14703	-3.85806	-3.70148	-1.33383	1.28671	5.64053	12.0851	14.0042	18.8735	18.5028	12.6734
291.5	-5.06735	-4.33929	-3.71866	-1.36978	1.57187	5.48273	11.869	13.6408	18.6981	18.0731	12.5012
292.5	-5.24823	-4.65649	-3.8046	-1.7514	1.88165	5.80814	11.8007	13.5912	18.1833	17.9571	12.3266
293.5	-5.2951	-4.29712	-3.83353	-2.05923	1.82346	5.68118	11.9218	13.528	18.3208	18.1188	12.4433
294.5	-4.91266	-4.19516	-3.76828	-2.02252	1.67227	6.03391	12.2542	13.5865	18.3153	18.0079	12.5039
295.5	-5.12323	-4.1561	-3.90189	-1.99167	1.409	6.26749	12.264	13.9647	18.2141	17.6114	12.2688
296.5	-5.54901	-4.03656	-3.83469	-2.1897	1.17227	6.02493	11.8862	13.7635	17.8114	17.0497	11.8586
297.5	-5.19275	-4.35141	-3.91632	-2.3096	1.24179	6.24054	11.8562	13.6108	17.8442	16.9595	11.7211
298.5	-4.733	-4.08578	-3.84525	-2.13345	1.53827	6.19916	12.1632	13.5529	17.9704	17.1931	11.4832
299.5	-4.59235	-3.65219	-3.87491	-2.1604	1.55548	6.31085	12.3062	13.835	18.3204	17.7271	11.9906
300.5	-4.70758	-3.31741	-3.496	-1.61859	1.23672	7.04678	12.4409	14.028	18.5974	18.1974	12.3242
301.5	-4.56424	-3.26859	-3.32336	-1.8139	1.2496	7.55499	12.5206	14.176	18.7442	18.0396	12.1976
302.5	-4.32947	-3.20688	-3.41046	-1.73541	1.54141	7.1265	12.4968	13.835	18.8274	18.0462	11.9574
303.5	-4.43298	-3.39984	-3.16397	-2.07916	1.93359	6.57727	12.389	13.8076	18.9532	17.9591	12.1625
304.5	-4.49042	-3.80298	-3.02493	-2.24554	2.0961	6.39639	12.1851	13.6112	18.8055	17.8196	12.0793
305.5	-4.56815	-3.85608	-3.15967	-2.04868	1.86758	6.19876	12.2487	13.5244	18.2899	17.8263	11.9836
306.5	-4.89862	-3.73306	-3.43079	-2.01782	1.49765	6.01672	12.2792	13.8792	18.1602	17.9274	11.9504
307.5	-4.80487	-3.78891	-3.95343	-2.07526	1.11444	5.67413	12.0769	13.7213	18.2388	17.6438	11.7508
308.5	-4.60837	-3.99673	-3.93585	-2.48969	1.21405	5.43936	11.696	13.8741	17.9235	17.6013	11.4168
309.5	-4.72009	-3.93384	-3.61282	-2.70258	1.43866	5.38156	11.2651	13.8467	17.4095	17.706	11.3285
310.5	-5.10135	-4.10452	-3.73547	-2.70963	1.38632	5.24249	11.2159	13.6408	17.3368	17.5641	11.4863
311.5	-4.9451	-4.50375	-3.89874	-2.32797	0.933594	5.22141	11.339	13.4522	17.3575	17.5887	11.5617
312.5	-4.52948	-4.30533	-4.25656	-2.11081	0.429688	5.13977	11.7749	13.3491	17.0091	17.3521	11.6281
313.5	-4.27673	-4.31274	-4.64288	-2.39984	0.4664	5.47256	11.5706	13.4928	16.8321	17.2411	11.3179
314.5	-4.70758	-4.52094	-4.40189	-2.39008	0.857025	5.45383	11.453	13.6963	16.9985	17.4177	11.1094
315.5	-4.99197	-4.21429	-3.97842	-2.10571	0.874603	5.43585	11.5507	13.6905	17.3813	16.9286	10.8004
316.5	-4.71503	-3.96429	-3.55383	-1.80063	0.819519	5.53821	11.3296	13.2592	17.4771	16.8704	10.6953
317.5	-4.37048	-4.06741	-3.53897	-2.14008	0.662506	5.39795	11.3257	13.0467	17.5075	17.0411	10.6684
318.5	-4.40564	-4.20377	-4.2132	-2.27759	0.649231	5.47296	11.5815	12.7651	17.5337	16.6602	10.6785
319.5	-4.31891	-3.79126	-4.41281	-2.32877	0.453888	5.60147	11.7562	12.7092	17.5771	16.7993	10.7484
320.5	-4.51501	-3.84204	-3.82336	-2.17252	0.778503	5.94797	11.8608	12.9885	17.8634	16.9997	10.7441
321.5	-4.55643	-3.36197	-3.3511	-1.96042	1.21133	5.84875	12.262	12.9858	17.8747	17.2685	10.9051
322.5	-4.3244	-3.05258	-3.09485	-1.7858	1.38907	5.85306	12.4851	12.8947	17.9548	17.0887	10.9832
323.5	-3.94196	-2.89594	-2.79327	-1.49789	1.72696	6.24564	12.7308	13.258	18.0302	16.6911	11.3164
324.5	-3.81384	-2.98892	-3.25656	-1.60025	1.64569	6.28625	12.6382	13.4475	17.8517	16.7438	11.6348
325.5	-4.05719	-3.17172	-3.61047	-1.70572	0.922272	5.76907	12.4777	13.2975	17.6274	16.6184	11.6148
326.5	-4.41071	-3.47446	-3.08899	-1.80768	0.939453	6.01672	12.2315	12.7029	17.6114	16.7837	11.1918
327.5	-4.66266	-3.79828	-3.13586	-2.08267	0.810944	5.69641	12.0144	12.6889	17.6122	16.7067	10.8418
328.5	-4.70291	-4.2182	-3.29092	-2.29477	1.08984	5.04092	11.4738	12.4944	17.3263	16.5192	10.5656
329.5	-4.58804	-4.27368	-3.35541	-2.53305	1.10858	5.27493	11.2937	12.3264	17.072	16.8231	9.88475
330.5	-4.84744	-3.94946	-3.55969	-2.48151	0.761719	5.32571	11.7355	12.3615	16.9751	16.7071	9.55663
331.5	-5.06775	-3.73538	-4.15381	-2.73032	0.524231	5.33389	11.6823	12.1237	16.7009	16.7966	9.74532
332.5	-5.03104	-3.9725	-4.39993	-2.59906	0.46405	4.89758	10.9519	12.2959	16.5325	16.5099	10.1332
333.5	-4.83377	-4.00024	-4.19641	-2.42877	0.744537	4.70773	10.4741	12.1467	16.5669	16.5571	9.83046
334.5	-4.87674	-3.99478	-4.30069	-2.39008	0.850769	4.7507	10.3788	12.0205	16.6552	16.5185	9.10664
335.5	-5.05017	-4.07095	-4.27219	-2.68228	0.928894	4.58899	10.7011	12.1123	16.3739	16.1794	9.13594
336.5	-4.91266	-3.8428	-3.9343	-2.51352	0.951569	5.08118	10.589	12.2315	16.2997	16.1044	8.75038
337.5	-4.96735	-3.87955	-4.21866	-2.48697	0.569916	5.1593	10.6757	12.2444	16.2813	15.9895	8.73164
338.5	-4.94275	-4.18774	-4.62531	-2.91351	-0.101959	5.38431	10.7487	12.2877	16.2618	15.7286	9.11482
339.5	-4.80093	-4.33813	-4.36984	-2.6358	-0.141418	5.04446	10.7749	12.6151	16.2059	15.847	9.43358
340.5	-4.73962	-4.185	-3.96631	-2.74438	-0.289063	5.13196	10.7991	12.6553	16.3853	15.8481	9.70546
341.5	-4.39938	-4.41391	-3.53275	-2.69244	0.125793	5.44366	11.0374	12.7264	16.2954	15.7907	10.0273
342.5	-4.25095	-4.35452	-3.1304	-2.71469	0.323822	5.86319	11.5109	12.8526	16.4809	16.2477	10.2769
343.5	-4.26111	-4.20493	-2.97455	-2.59164	-0.0117188	5.97806	11.7733	12.7651	16.6958	16.545	10.4555
344.5	-4.37244	-3.92523	-2.69366	-2.44907	0.0691528	6.12686	11.8249	12.8424	16.7899	16.2485	10.5609
345.5	-4.37048	-3.72366	-2.93936	-2.30063	0.498444	5.86633	11.2921	13.2787	16.7368	16.1555	10.9086
346.5	-4.4408	-4.07056	-3.47647	-2.19907	0.964844	5.68976	11.2218	12.7983	17.0223	16.006	10.991
347.5	-4.60214	-4.38696	-3.5683	-1.84985	0.93634	5.61008	11.3093	12.2119	17.152	16.2571	10.8586
348.5	-4.93533	-4.56937	-3.86398	-2.31976	0.766022	5.17374	11.1163	11.9588	17.1126	16.2462	10.3445
349.5	-4.90604	-4.25024	-4.18195	-2.70923	0.546875	5.09406	11.0749	11.9991	16.5235	15.8802	10.0031
350.5	-4.88611	-4.10062	-4.68936	-2.41156	0.228912	5.15619	10.9386	12.0444	16.0989	15.8094	9.54024
351.5	-5.01385	-4.07446	-4.99405	-2.47369	0.504303	5.38391	10.7698	11.9795	16.0837	15.5431	9.46834
352.5	-4.95798	-4.09946	-4.95187	-2.32877	0.919922	5.13666	10.4757	11.86	16.27	15.4973	9.31133
353.5	-5.30292	-4.04282	-4.79132	-2.18814	0.911713	4.39209	10.2878	11.7901	16.0903	15.6602	9.27266
354.5	-5.60916	-4.28384	-4.83899	-2.34595	0.71524	4.29602	10.5925	11.6537	15.8841	15.6009	9.23436
355.5	-5.30759	-4.52213	-4.84485	-2.68579	0.795715	4.4718	10.5827	11.6385	15.6341	15.2368	8.97694
356.5	-5.05563	-4.7897	-4.78391	-2.70493	0.69101	4.35071	10.4265	11.6846	15.3395	14.8122	8.68983
357.5	-4.81033	-4.21313	-4.68118	-2.67917	1.08359	4.30264	10.4081	11.6705	15.3747	14.752	8.47224
358.5	-4.97946	-4.51041	-4.53976	-2.77914	1.20819	4.64563	9.98898	11.5338	15.4954	14.8509	8.70665
359.5	-4.69901	-6.19672	-4.21985	-2.76627	0.657043	4.24484	10.0186	11.2198	15.3579	14.7571	8.78984
360.5	-4.43179	-7.96744	-4.03311	-2.82407	0.303131	4.07452	10.2241	11.2408	15.095	14.6524	8.93437
361.5	-4.26425	-7.66547	-3.61594	-2.87094	0.65155	4.45578	10.3445	11.3701	15.3145	14.9321	8.69881
362.5	-4.28729	-7.25336	-3.36594	-3.14673	0.674988	4.89874	11.0163	11.7498	15.3587	14.8509	8.56013
363.5	-4.11853	-7.14594	-2.76788	-2.85416	0.816803	5.03195	11.2937	12.1447	15.8845	15.188	8.71288
364.5	-4.28766	-6.52914	-2.73157	-2.71899	0.857422	4.92453	11.0882	12.426	16.3009	15.2505	8.68944
365.5	-4.18143	-6.37955	-2.75381	-2.6889	0.538269	5.08899	11.078	12.3651	16.463	15.4829	9.14571
366.5	-4.3486	-6.70767	-2.86163	-2.50882	0.614441	4.68976	11.2065	12.2252	16.4024	15.8028	9.13515
367.5	-4.51697	-7.07407	-3.32883	-1.95416	0.769135	4.44055	11.1468	11.9213	16.3845	15.4696	8.99062
368.5	-4.5033	-7.39594	-3.32803	-1.87564	0.507019	3.87494	10.9769	12.0768	16.4771	15.4052	8.59724
369.5	-4.84039	-8.0022	-3.28821	-2.15884	0.569916	3.54718	11.0366	12.3612	16.6528	15.3005	8.56444
370.5	-4.78845	-8.08423	-3.45929	-2.29907	0.630096	4.10187	10.5229	12.1502	16.413	15.0907	8.72578
371.5	-4.7951	-8.16547	-3.63858	-2.42252	0.816803	4.92999	10.1902	11.7467	16.2923	15.0126	8.34138
372.5	-4.68103	-8.31665	-3.78937	-2.2612	0.981628	4.50031	10.4003	11.5506	16.5681	15.1145	8.22304
373.5	-4.91971	-8.14203	-3.77454	-2.01196	0.739838	3.95343	10.5601	11.5678	16.4384	15.0884	8.58632
374.5	-5.09354	-7.9393	-3.89328	-1.89206	0.685547	3.746	10.3339	11.728	16.1661	15.0638	8.32735
375.5	-5.09744	-8.25806	-3.99719	-2.38657	0.809753	3.7468	9.99445	11.6561	16.0544	14.7798	7.88243
376.5	-5.47791	-8.55298	-4.21008	-2.77133	0.633606	3.73624	9.72687	11.5987	15.7083	14.4759	7.87929
377.5	-5.93765	-8.51547	-4.37415	-3.1893	0.344147	3.79718	9.72531	11.0752	15.3454	14.8845	8.10585
378.5	-5.99118	-8.35257	-4.57767	-3.11313	0.240997	4.27805	9.85852	10.835	15.5645	14.9306	8.33788
379.5	-5.71188	-7.89047	-4.56555	-2.9487	0.208984	5.04056	10.0031	10.9487	15.5587	14.8923	8.34608
380.5	-5.72906	-7.80923	-4.47842	-3.31744	0.130463	5.35501	9.60577	10.8862	15.5685	14.6419	8.17305
381.5	-5.82361	-7.80414	-4.17218	-3.25336	-0.0328064	5.26944	9.59094	10.833	15.2325	14.1993	7.61913
382.5	-5.47284	-8.37485	-4.23001	-3.07172	-0.055481	5.36789	9.755	10.9565	15.2681	14.1739	7.36601
383.5	-4.849	-8.19672	-4.00735	-2.73657	0.238678	5.67258	9.69797	11.0963	15.6282	14.3185	7.65779
384.5	-4.46033	-7.59164	-4.08078	-2.5596	0.313293	5.83078	9.68195	11.042	15.8493	14.6653	8.09492
385.5	-4.33102	-7.34515	-3.871	-2.37485	0.398834	5.72531	10.0097	10.9682	15.9052	14.7294	8.24452
386.5	-4.43378	-7.50922	-3.79327	-2.17133	0.546875	5.52335	10.4898	11.2654	16.0294	15.0134	8.18007
387.5	-4.63104	-7.43304	-3.69836	-2.17096	0.702332	5.50735	10.6108	11.2994	16.2165	14.9833	7.96208
388.5	-4.86032	-7.29556	-3.3382	-2.10611	0.967194	5.64874	10.7663	11.583	16.1763	14.8368	7.89726
389.5	-4.9689	-6.92914	-3.34055	-2.09985	0.835541	5.35617	10.9257	11.7412	15.8634	14.8946	7.99727
390.5	-5.41385	-7.5022	-4.08469	-2.18658	0.721497	4.88742	10.814	11.6053	15.7442	14.7856	8.59843
391.5	-5.2865	-7.95142	-4.27454	-2.62875	0.442596	4.40775	10.405	11.4842	15.6114	14.6841	8.34492
392.5	-5.17206	-7.79517	-3.80695	-2.77252	0.378906	4.50266	10.4476	11.3182	15.6044	14.695	7.93828
393.5	-4.92557	-8.02719	-3.86438	-2.87915	0.0625	4.44916	10.2245	11.5147	15.3774	14.5446	7.74297
394.5	-5.78214	-8.27338	-4.44431	-3.54947	-0.154144	4.2796	9.74585	11.469	14.9859	14.8648	8.01546
395.5	-0.455872	-3.02603	0.358032	1.66763	4.67297	3.93936	13.9434	16.3301	19.4592	15.641	8.69789
396.5	-13.2501	-17.0406	-17.4381	-15.3659	-6.21945	7.3204	3.15735	3.69312	7.89273	14.3053	8.4756
397.5	-26.503	-28.5937	-25.8325	-24.2889	-19.3823	-11.3483	-10.0142	-7.68976	-3.01263	-1.58194	-6.58345
398.5	-31.6252	-34.2725	-30.3131	-29.2639	-24.4063	-18.2263	-15.4369	-12.3938	-7.97241	-7.37711	-11.3123
399.5	-33.5116	-36.7134	-35.1261	-30.9261	-26.6392	-21.6617	-17.3302	-14.1242	-9.76938	-9.85654	-13.2975
400.5	-33.7894	-37.4077	-39.7216	-31.2131	-27.8489	-22.5717	-18.3902	-15.2909	-10.1873	-10.672	-13.1263
401.5	-33.7547	-36.7897	-40.7448	-30.9103	-27.6462	-22.4912	-18.1201	-14.9769	-9.33264	-10.6581	-12.7448
402.5	-34.1903	-36.8443	-41.2588	-31.1336	-27.4819	-22.7466	-17.7978	-15.2673	-9.92178	-11.1119	-11.7743
403.5	-33.742	-33.9467	-41.3773	-30.9226	-27.6928	-22.8148	-17.5031	-14.8656	-10.5123	-11.4194	-13.1138
404.5	-34.4707	-31.7117	-42.0389	-31.0659	-28.3218	-23.3628	-17.728	-15.0828	-11.2483	-12.1345	-11.9227
405.5	-34.7773	-32.2737	-42.134	-31.9307	-28.5652	-23.6627	-18.2295	-15.4679	-11.8263	-11.8824	-14.2443
406.5	-35.1974	-32.6349	-42.2621	-32.1109	-28.9321	-24.12	-18.1891	-15.9646	-12.3004	-12.1435	-15.3614
407.5	-35.2425	-33.0718	-42.9113	-32.436	-29.2295	-24.1212	-18.9003	-17.0152	-12.5645	-12.203	-16.2189
408.5	-35.9959	-33.0684	-43.2559	-32.5286	-29.3799	-24.3307	-19.4919	-17.4466	-12.4234	-12.0728	-16.5637
409.5	-36.2755	-33.6844	-43.8295	-33.2705	-29.3795	-24.7727	-19.7238	-17.3609	-12.5893	-12.1934	-16.599
410.5	-36.2313	-33.8476	-43.817	-33.1497	-29.5002	-25.1637	-19.8546	-17.5313	-12.6338	-11.8984	-16.713
411.5	-35.9759	-33.7188	-44.3693	-33.1977	-29.6842	-25.0512	-20.0211	-17.2562	-12.637	-12.3955	-16.7417
412.5	-36.2659	-33.3338	-44.2539	-32.6936	-29.3202	-25.0923	-20.16	-17.0484	-12.9846	-12.8687	-16.3527
413.5	-35.424	-32.9398	-43.4456	-32.5953	-29.4059	-24.4747	-19.6609	-16.4824	-12.9965	-12.8512	-15.5899
414.5	-34.7841	-32.422	-42.9759	-32.2922	-28.9216	-23.6249	-18.8994	-15.7324	-12.5547	-12.2015	-15.5348
415.5	-34.9959	-32.4671	-42.4684	-32.0189	-29.4269	-23.4313	-19.1448	-15.8065	-12.2471	-11.9858	-15.5429
416.5	-35.1355	-32.9633	-42.535	-32.271	-29.6289	-23.9463	-19.3991	-15.5106	-12.2048	-12.1731	-15.6674
417.5	-35.4879	-33.8099	-42.9845	-32.8321	-29.5385	-24.5626	-19.3892	-15.7396	-12.1581	-11.863	-15.5246
418.5	-35.8519	-34.7579	-43.9456	-33.2676	-30.0048	-24.6398	-19.7423	-16.123	-12.7405	-12.8046	-16.4398
419.5	-36.0663	-34.337	-44.5205	-33.0196	-29.8152	-24.8251	-19.7847	-16.3593	-12.9101	-13.1087	-16.7632
420.5	-36.0782	-33.9277	-44.3126	-32.7106	-29.9197	-24.9855	-19.591	-16.8563	-12.5648	-13.2864	-15.8634
421.5	-35.9521	-34.2415	-44.4326	-33.1146	-29.3962	-25.2387	-19.973	-17.4209	-12.9218	-13.4235	-15.8328
422.5	-35.9327	-34.4948	-44.421	-33.2041	-29.4769	-25.5393	-20.1816	-17.6727	-13.4301	-13.1435	-15.664

## Sheet: Fig5 CD
Wavelength [nm]	WT	D605A	V606A
260	58513.8	8149.33	21695.3
259.8	63167.3	3854.07	23551.6
259.6	64295.3	11391.4	29846.5
259.4	58970.2	6805.37	24122.3
259.2	48271.9	4476.91	10726.4
259	38510.4	868.556	-1474.84
258.8	32982.1	-3674.87	-12261.9
258.6	27171.3	15.6117	-10203.8
258.4	34445.9	1392.03	-7934.57
258.2	38651.6	1471.03	-721.67
258	42144.2	6113.29	7679.35
257.8	46857.9	1258.85	11065.3
257.6	55999.4	7374.85	18407.9
257.4	57718.2	17154.9	24635.8
257.2	58975.4	21084.6	23676.4
257	58780.8	22867.8	20724
256.8	53028.6	23172.7	19174.1
256.6	49305.2	18336.5	10737.6
256.4	49785.7	12202	4365.18
256.2	49432.6	4689.5	2754.59
256	46019.2	1162.33	1654.44
255.8	50924.1	119.192	6685.9
255.6	54905.8	4611.58	14227.3
255.4	54783.5	11254.2	16206.8
255.2	56574.6	15086.7	15287.2
255	55074.6	20879.4	15905.9
254.8	57072.3	26632.8	16119.1
254.6	59357.7	36854.3	16977.8
254.4	62445.6	40166.5	12152.5
254.2	56130.3	39840.9	5536.06
254	49222.5	30627.5	-4691.26
253.8	48843.6	23446	-12766.5
253.6	49629	17212.6	-6478.74
253.4	59428.3	11502.6	592.568
253.2	67584.7	18319.6	12430.2
253	60339.4	11496.1	14030.3
252.8	56002.9	12175.3	11431.7
252.6	52355.2	16911.6	8321.74
252.4	52083.1	10224.1	2728.66
252.2	57082.7	11485.1	6309.32
252	61684.4	10662.1	10481.9
251.8	71580.3	11819.7	11970.1
251.6	61124.7	14012.2	10462.2
251.4	52660	13634.4	8071
251.2	52036.6	14198.8	9490.59
251	42724.6	5701.55	11966.6
250.8	45969.3	2761.11	16153.4
250.6	34256.5	-3073.61	14141
250.4	25859	-2480.1	14669.8
250.2	17535.6	2189.85	10965.6
250	6863.01	-1886.85	393.416
249.8	10031.9	-3000.85	-5264.15
249.6	17802.5	-6138.54	-9373.43
249.4	21331.3	-6944.79	-10496.5
249.2	25926.2	-12223.6	-12984.8
249	23584	-14684.8	-20244.1
248.8	23899.1	-13696.3	-19765.8
248.6	27043.9	-17634.9	-21243.1
248.4	26077.7	-16882.1	-23333.3
248.2	23776.8	-20413.8	-24861.9
248	20985.1	-26214.4	-30035.7
247.8	12472.3	-27163.1	-36696.7
247.6	3861.2	-33623.4	-40834.1
247.4	-800.828	-26580.3	-36297
247.2	-8609.33	-29827.7	-40164.7
247	-13798.4	-31554.6	-48469.9
246.8	-12492.9	-29761.2	-50149.8
246.6	-8347.56	-34284.8	-54451.1
246.4	-5197.63	-34540.3	-57115.1
246.2	-4074.75	-36820.4	-52439.5
246	-1586.16	-43196.8	-56469.5
245.8	-7305.62	-54663.3	-62856
245.6	-16197.4	-62538	-66352.2
245.4	-24779.2	-73318.6	-69734.3
245.2	-39414.5	-79231.3	-73244.2
245	-45242.5	-80946.8	-77001.1
244.8	-46882	-82038.9	-80327.2
244.6	-49997.5	-78208.9	-87150.2
244.4	-49336.2	-81794.7	-85908.6
244.2	-51736.9	-87093.5	-87486.8
244	-55994.2	-95190.5	-87013.8
243.8	-65562.9	-101099	-92888.7
243.6	-69079.6	-106709	-109740
243.4	-79316.4	-109368	-115871
243.2	-88580.2	-119488	-125645
243	-90621	-136694	-129640
242.8	-92415.6	-149414	-135486
242.6	-98946.2	-157769	-146034
242.4	-111232	-166758	-161242
242.2	-116032	-162399	-177206
242	-129317	-164605	-184219
241.8	-142057	-174750	-189322
241.6	-143600	-179501	-192630
241.4	-151389	-190204	-196714
241.2	-157598	-198157	-207650
241	-161614	-213447	-224209
240.8	-168131	-228049	-240092
240.6	-192376	-244055	-254826
240.4	-208622	-260426	-263193
240.2	-225122	-271153	-268814
240	-245102	-276806	-280899
239.8	-250532	-285357	-294750
239.6	-257526	-299610	-310198
239.4	-277057	-314254	-322937
239.2	-287192	-331784	-326356
239	-296227	-347508	-329732
238.8	-313306	-358408	-340614
238.6	-328169	-368043	-350380
238.4	-347415	-386724	-368899
238.2	-366927	-403139	-392175
238	-384720	-423317	-412381
237.8	-400545	-439156	-439067
237.6	-415666	-455208	-459193
237.4	-428069	-461798	-473698
237.2	-450604	-476760	-486039
237	-465142	-491815	-501571
236.8	-481373	-501430	-521501
236.6	-506571	-529236	-541334
236.4	-524029	-552896	-569685
236.2	-544188	-577232	-586984
236	-575485	-602592	-612397
235.8	-598160	-620557	-638476
235.6	-619252	-629394	-656200
235.4	-644637	-644407	-670230
235.2	-660513	-667903	-687510
235	-674199	-689998	-700120
234.8	-690317	-717332	-712601
234.6	-705797	-748848	-738559
234.4	-723282	-761372	-760161
234.2	-745688	-774888	-785994
234	-770991	-795874	-814117
233.8	-801338	-812278	-840396
233.6	-826579	-840648	-867519
233.4	-860248	-869091	-887128
233.2	-884636	-890659	-908805
233	-907777	-915314	-932877
232.8	-933049	-934106	-954189
232.6	-955534	-961996	-969997
232.4	-987511	-982381	-998597
232.2	-1020000	-1010000	-1020000
232	-1060000	-1030000	-1040000
231.8	-1080000	-1060000	-1060000
231.6	-1100000	-1090000	-1070000
231.4	-1130000	-1120000	-1080000
231.2	-1140000	-1140000	-1110000
231	-1150000	-1160000	-1140000
230.8	-1170000	-1180000	-1190000
230.6	-1190000	-1190000	-1230000
230.4	-1220000	-1210000	-1270000
230.2	-1260000	-1230000	-1310000
230	-1300000	-1260000	-1330000
229.8	-1340000	-1300000	-1350000
229.6	-1360000	-1330000	-1380000
229.4	-1390000	-1350000	-1400000
229.2	-1420000	-1390000	-1420000
229	-1440000	-1410000	-1450000
228.8	-1470000	-1430000	-1470000
228.6	-1500000	-1460000	-1490000
228.4	-1530000	-1490000	-1530000
228.2	-1560000	-1530000	-1560000
228	-1600000	-1560000	-1610000
227.8	-1640000	-1590000	-1660000
227.6	-1660000	-1620000	-1680000
227.4	-1690000	-1640000	-1720000
227.2	-1730000	-1680000	-1750000
227	-1760000	-1710000	-1770000
226.8	-1780000	-1750000	-1810000
226.6	-1810000	-1790000	-1830000
226.4	-1830000	-1810000	-1860000
226.2	-1860000	-1840000	-1890000
226	-1900000	-1860000	-1910000
225.8	-1930000	-1880000	-1940000
225.6	-1970000	-1900000	-1970000
225.4	-2010000	-1930000	-1990000
225.2	-2040000	-1960000	-2020000
225	-2070000	-1990000	-2040000
224.8	-2080000	-2020000	-2060000
224.6	-2110000	-2030000	-2090000
224.4	-2130000	-2040000	-2120000
224.2	-2160000	-2060000	-2140000
224	-2190000	-2090000	-2150000
223.8	-2210000	-2120000	-2180000
223.6	-2230000	-2140000	-2190000
223.4	-2250000	-2170000	-2220000
223.2	-2260000	-2190000	-2250000
223	-2270000	-2200000	-2270000
222.8	-2290000	-2210000	-2300000
222.6	-2300000	-2220000	-2320000
222.4	-2310000	-2250000	-2330000
222.2	-2330000	-2280000	-2350000
222	-2340000	-2290000	-2360000
221.8	-2350000	-2300000	-2370000
221.6	-2360000	-2310000	-2380000
221.4	-2390000	-2310000	-2400000
221.2	-2410000	-2320000	-2390000
221	-2420000	-2320000	-2380000
220.8	-2420000	-2310000	-2380000
220.6	-2430000	-2290000	-2390000
220.4	-2430000	-2310000	-2390000
220.2	-2420000	-2320000	-2410000
220	-2430000	-2340000	-2430000
219.8	-2410000	-2350000	-2440000
219.6	-2410000	-2350000	-2440000
219.4	-2410000	-2340000	-2420000
219.2	-2420000	-2330000	-2420000
219	-2410000	-2330000	-2410000
218.8	-2420000	-2350000	-2410000
218.6	-2420000	-2360000	-2420000
218.4	-2420000	-2370000	-2420000
218.2	-2430000	-2380000	-2410000
218	-2420000	-2360000	-2420000
217.8	-2410000	-2350000	-2430000
217.6	-2400000	-2350000	-2420000
217.4	-2380000	-2350000	-2420000
217.2	-2380000	-2330000	-2420000
217	-2390000	-2330000	-2390000
216.8	-2390000	-2320000	-2370000
216.6	-2410000	-2290000	-2360000
216.4	-2410000	-2310000	-2340000
216.2	-2400000	-2320000	-2350000
216	-2400000	-2340000	-2360000
215.8	-2390000	-2380000	-2370000
215.6	-2400000	-2390000	-2360000
215.4	-2400000	-2370000	-2350000
215.2	-2400000	-2330000	-2350000
215	-2410000	-2310000	-2340000
214.8	-2390000	-2280000	-2340000
214.6	-2390000	-2260000	-2340000
214.4	-2380000	-2250000	-2350000
214.2	-2340000	-2230000	-2360000
214	-2340000	-2240000	-2360000
213.8	-2340000	-2260000	-2360000
213.6	-2350000	-2270000	-2330000
213.4	-2360000	-2280000	-2300000
213.2	-2350000	-2270000	-2280000
213	-2350000	-2240000	-2260000
212.8	-2350000	-2230000	-2290000
212.6	-2340000	-2230000	-2340000
212.4	-2360000	-2220000	-2340000
212.2	-2360000	-2230000	-2390000
212	-2370000	-2260000	-2390000
211.8	-2390000	-2260000	-2370000
211.6	-2420000	-2330000	-2380000
211.4	-2440000	-2330000	-2340000
211.2	-2450000	-2310000	-2320000
211	-2440000	-2330000	-2320000
210.8	-2430000	-2310000	-2330000
210.6	-2430000	-2340000	-2320000
210.4	-2440000	-2400000	-2360000
210.2	-2450000	-2410000	-2400000
210	-2450000	-2460000	-2400000
209.8	-2480000	-2440000	-2440000
209.6	-2480000	-2420000	-2460000
209.4	-2510000	-2380000	-2460000
209.2	-2520000	-2350000	-2470000
209	-2500000	-2350000	-2460000
208.8	-2490000	-2380000	-2530000
208.6	-2470000	-2360000	-2490000
208.4	-2450000	-2380000	-2520000
208.2	-2440000	-2370000	-2530000
208	-2400000	-2370000	-2470000
207.8	-2410000	-2360000	-2490000
207.6	-2420000	-2380000	-2420000
207.4	-2420000	-2380000	-2410000
207.2	-2440000	-2360000	-2370000
207	-2420000	-2340000	-2390000
206.8	-2370000	-2180000	-2450000
206.6	-2350000	-2030000	-2390000
206.4	-2280000	-2030000	-2440000
206.2	-2230000	-2030000	-2360000
206	-2200000	-2080000	-2200000
205.8	-2160000	-2300000	-2070000
205.6	-2130000	-2310000	-1890000
205.4	-2090000	-2310000	-1780000
205.2	-2020000	-2400000	-1750000
205	-1990000	-2400000	-1890000
204.8	-1910000	-2480000	-2050000
204.6	-1860000	-2370000	-1920000
204.4	-1790000	-2180000	-2000000
204.2	-1690000	-2040000	-1730000
204	-1580000	-1810000	-1630000
203.8	-1510000	-2000000	-1350000
203.6	-1460000	-2020000	-1100000
203.4	-1390000	-1760000	-892358
203.2	-1310000	-1600000	-313760
203	-1250000	-666643	-468695
202.8	-1190000	183634	-950000
202.6	-1140000	786274	-347296
202.4	-1090000	1550000	-602915
202.2	-905480	1510000	-771335
202	-775453	1280000	612638
201.8	-594466	1400000	-22773.6
201.6	-559143	679986	-1390000
201.4	-540065	558865	-1340000
201.2	-364253	38918.7	-2400000
201	-323805	-1220000	-2190000
200.8	-126319	-2080000	120143
200.6	-89815	-1640000	1410000
200.4	-122956	-1720000	2120000
200.2	-39927.7	-1590000	2810000
200	-6458.29	-2070000	2610000
199.8	210139	-2500000	763618
199.6	523488	-2540000	-547953
199.4	956454	-2360000	-218329
199.2	1260000	-1090000	-1580000
199	1660000	-423393	-184892
198.8	1660000	-935908	571378
198.6	1740000	-1170000	74360
198.4	1760000	779301	940101
198.2	2030000	725247	1640000
198	2250000	2590000	2180000
197.8	2460000	2960000	2410000
197.6	3860000	2780000	2710000
197.4	2970000	3030000	1730000
197.2	1740000	2530000	200679
197	1020000	2090000	-365249
196.8	92617.1	-683452	-907828
196.6	-815005	-2760000	-2280000
196.4	-211551	-4760000	-1530000
196.2	55257.1	-4210000	-887380
196	-804307	-1150000	-568340
195.8	-23348	-149974	-314232
195.6	-1800000	447464	90811.8
195.4	-2910000	355315	-1510000
195.2	-4170000	-662739	-3760000
195	-5910000	-364934	-2730000
194.8	-4890000	370206	-3520000
194.6	-4230000	-703094	-2840000
194.4	-3970000	-1570000	-290693
194.2	-2860000	-2520000	-496203
194	-102017	-1530000	-200130
193.8	977651	-285062	564829
193.6	2490000	-459541	21166.8
193.4	4390000	367549	-179821
193.2	614519	-422840	-491185
193	-1550000	-1194.5	-33656.9
192.8	-3860000	-393317	250531
192.6	-7050000	-539704	1160000
192.4	-6850000	87047.5	1960000
192.2	-5720000	-282899	1280000
192	-2430000	-171975	91234.3
191.8	2120000	933745	577111
191.6	5050000	1440000	-499661
191.4	3810000	-725810	11483.6
191.2	1460000	-66673.3	1730000
191	-298948	-1210000	1930000
190.8	-3870000	-393061	489196
190.6	-2110000	2190000	239892
190.4	-2620000	2180000	-2590000
190.2	-1970000	2510000	-2980000
190	-997754	1010000	-1740000
